# Supplementary material
Source: publisher site journal article supplement (https://www.dovepress.com/get_supplementary_file.php?f=496124.xlsx)
Supplement: Supplementary file 1 [file get_supplementary_file.php]

## Sheet: Index
Supplementary Table Index
Supplementary Table 1: Quantification of Drug Dosage
Supplementary Table 2: Summary of Targets for TSD, YJD, PQT, and LDH
Supplementary Table 3: TSD-PPI
Supplementary Table 4: YJD-PPI
Supplementary Table 5: PQT-PPI
Supplementary Table 6: LDH-PPI
Supplementary Table 7: VIKOR Calculation Results for TSD, YJD, PQT, and LDH Targets
Supplementary Table 8: Final Score Calculation Results for TSD, YJD, PQT, and LDH Targets
Supplementary Table 9: Thermal Hyperalgesia Test Results

## Sheet: Table 1
Supplementary Table 1: Quantification of Drug Dosage
Drug name	Accepted scientific name	Herb weight_TSD(dose)	Herb weight_YJD(dose)	Herb weight_PQT(dose)
Tao Ren	Prunus persica (L.) Batsch	4	9	\
Hong hua	Carthamus tinctorius L.	4	6	0.025
Shu Di Huang	Rehmannia glutinosa (Gaertn.) DC.	8	\	\
Bai Shao	Paeonia lactiflora Pall.	8	\	\
Dang Gui	Angelica sinensis (Oliv.) Diels	8	9	0.125
Chuan Xiong	Conioselinum anthriscoides 'Chuanxiong'	4	9	\
Sheng Di Huang	Rehmannia glutinosa (Gaertn.) DC.	\	9	\
Chuan Niu Xi	Cyathula officinalis K.C.Kuan	\	12	\
Di Long	(an annelid)-Pheretima aspergillum (E. Perrier)	\	6	\
Fu Ling	(fungus)-Wolfiporia cocos (F.A. Wolf) Ryvarden & Gilb.	\	9	\
Gan Cao	Glycyrrhiza glabra L.	\	3	\
Pan Long Qi	Bergenia scopulosa T.P.Wang	\	\	0.05
Zhuang Jin Dan	Silene tatarinowii Regel	\	\	0.01
Wu Jia Pi	Eleutherococcus nodiflorus (Dunn) S.Y.Hu	\	\	0.05
Du Zhong	Eucommia ulmoides Oliv.	\	\	0.05
Zhu Zi Shen	Panax japonicus (T.Nees) C.A.Mey.	\	\	0.005
Qing Wa Qi	Iris tectorum Maxim.	\	\	0.005
Guo Shan Long	Rhaphidophora decursiva (Roxb.) Schott	\	\	0.025
Qin Jiao	Gentiana macrophylla Pall.	\	\	0.05
Mu Xiang	Dolomiaea costus (Falc.) Kasana & A.K.Pandey	\	\	0.025
Zu Si Ma	Daphne giraldii Nitsche	\	\	0.005
Luo Shi Teng	Trachelospermum jasminoides (Lindl.) Lem.	\	\	0.025
Chuan Wu	Aconitum carmichaelii Debeaux	\	\	0.005
Bai Mao Qi	Chloranthus multistachys C.Pei	\	\	0.01
Tie Bang Chui	Aconitum pendulum N.Busch	\	\	0.005
Cao Wu	Aconitum kusnezoffii Rchb.	\	\	0.005
Lao Shu Qi	Hylomecon japonica (Thunb.) Prantl	\	\	0.01
Zhi Zhu Liao	Bistorta suffulta (Maxim.) Greene ex H.Gross	\	\	0.025
Mo Yao	Commiphora myrrha (T.Nees) Engl.	\	\	0.025
Zhu Gen Qi	Disporopsis fuscopicta Hance	\	\	0.025
Xie Cao	Valeriana officinalis L.	\	\	0.05
Shen Jin Cao	Lycopodium clavatum L.	\	\	0.01
Niu Xi	Achyranthes bidentata Blume	\	\	0.05
Dan Shen	Salvia miltiorrhiza Bunge	\	\	0.075
Yang Jiao Qi	Aconitum henryi E.Pritz. ex Diels	\	\	0.025
Ba Li Ma	Sambucus javanica Reinw. ex Blume	\	\	0.025
Chong Lou	Paris yunnanensis Franch.	\	\	0.075
Ru Xiang	Boswellia sacra Flück.	\	\	0.025

## Sheet: Table 2
Supplementary Table 2: Summary of Targets for TSD, YJD, PQT, and LDH
TSD-target	YJD-target	PQT-target	LDH-target
ABCB1	AAK1	AADAT	ABCA1
ABCC1	ABAT	ABAT	ABCA4
ABCG2	ABCB1	ABCB1	ABCB1
ABL1	ABCC1	ABCB11	ABCB1B
ACACA	ABCG2	ABCC1	ABCB6
ACACB	ABL1	ABCC8	ABCC1
ACE	ACACA	ABCC9	ABCC4
ACE2	ACACB	ABCG2	ABCC5
ACHE	ACE	ABHD6	ACACA
ACLY	ACE2	ABL1	ACADM
ACP1	ACHE	ACACA	ACAN
ADAM17	ACKR3	ACACB	ACAP3
ADAMTS5	ACLY	ACE	ACE
ADCY1	ACP1	ACE2	ACIN1
ADK	ACVR1	ACHE	ACTB
ADORA1	ADA	ACKR3	ACTR3
ADORA2A	ADAM10	ACLY	ADAM33
ADORA2B	ADAM17	ACP1	ADAMTS1
ADORA3	ADAM33	ACPP	ADAMTS17
ADRA1A	ADAMTS4	ACVRL1	ADAMTS3
ADRA1B	ADAMTS5	ADA	ADAMTS4
ADRA1D	ADCY1	ADAM10	ADAMTS6
ADRA2A	ADCY5	ADAM17	ADAMTSL1
ADRA2C	ADK	ADAM9	ADGRG6
AGPAT2	ADORA1	ADAMTS4	ADH1B
AGTR1	ADORA2A	ADAMTS5	ADK
AGTR2	ADORA2B	ADCY1	ADORA1
AHR	ADORA3	ADCY10	ADORA2A
AKR1A1	ADRA1A	ADK	ADORA3
AKR1B1	ADRA1B	ADORA1	ADRB2
AKR1B10	ADRA1D	ADORA2A	AGT
AKR1C1	ADRA2A	ADORA2B	AGTR1A
AKR1C2	ADRA2B	ADORA3	AHR
AKR1C3	ADRA2C	ADRA1A	AIF1L
AKR1C4	ADRB1	ADRA1B	AIMP2
AKT1	ADRB2	ADRA1D	AKR1A1
ALDH2	AGPAT2	ADRA2A	AKR1C1
ALK	AGTR1	ADRA2B	AKR1C2
ALOX12	AGTR2	ADRA2C	AKR1C3
ALOX15	AHCY	ADRB1	AKT1
ALOX5	AHR	ADRB2	AKT2
ALOX5AP	AKR1A1	ADRB3	AKT3
ALPG	AKR1B1	AGL	ALAS1
ALPL	AKR1B10	AGPAT2	ALB
AMPD1	AKR1C1	AGTR1	ALDH1A1
AMPD2	AKR1C2	AGTR2	ALDH2
AMPD3	AKR1C3	AHCY	ALDOA
AMY1A	AKR1C4	AHR	AMH
ANPEP	AKT1	AKR1A1	ANGPTL3
AOC3	AKT2	AKR1B1	ANO9
APEX1	ALB	AKR1B10	ANPEP
APH1A	ALDH2	AKR1C1	AP2B1
APH1B	ALK	AKR1C2	APAF1
APP	ALOX12	AKR1C3	APOA1
AR	ALOX15	AKR1C4	APOA4
ARG1	ALOX15B	AKT1	APOC1
ASAH1	ALOX5	AKT2	APOE
ATIC	ALOX5AP	AKT3	APP
ATM	ALPG	ALDH1A1	APRT
ATP12A	ALPL	ALDH2	ARL6IP5
ATP2A1	AMPD1	ALDH3A1	ARPP19
ATP4A	AMPD2	ALK	ARRB2
ATP4B	AMPD3	ALKBH3	ARTN
AURKA	AMY1A	ALOX12	ASIC1
AURKB	AMY2A	ALOX15	ASIC2
AVPR1A	ANPEP	ALOX5	ASIC3
AVPR2	AOC3	ALOX5AP	ASL
AXL	APEX1	ALPL	ASPN
BACE1	APH1A	AMPD1	ASTN2
BACE2	APH1B	AMPD2	ATF4
BCHE	APP	AMPD3	ATM
BCL2	AR	AMY1A	ATP2A1
BCL2A1	ARG1	AMY2A	ATP5F1E
BCL2L1	ASAH1	ANPEP	ATP6V0B
BDKRB1	ASF1A	AOC3	ATP6V0D1
BLK	ATIC	APEX1	ATR
BMX	ATM	APH1A	ATRAID
BRAF	ATP12A	APH1B	AURKA
BRD2	ATP1A1	APP	B2M
BRD3	ATP2A1	AR	B4GALT1
BRD4	ATP4A	ARG1	BAD
BRD9	ATP4B	ASAH1	BAK1
BRSK2	ATR	ASF1A	BAP1
BTK	AURKA	ASIC3	BAX
C3AR1	AURKB	ATAD2	BAZ1B
C5AR1	AVPR1A	ATIC	BBC3
CA1	AVPR2	ATM	BBLN
CA12	AXL	ATP12A	BBOF1
CA13	BACE1	ATP1A1	BCAR3
CA14	BACE2	ATP2A1	BCL2
CA2	BAD	ATP4A	BCL2L1
CA3	BAZ2A	ATP4B	BCL2L11
CA4	BAZ2B	ATR	BDNF
CA5A	BCAT2	AURKA	BDNF-AS
CA5B	BCHE	AURKAIP1	BGLAP
CA6	BCL2	AURKB	BID
CA7	BCL2A1	AVPR1A	BIN1
CA9	BCL2L1	AVPR2	BIRC5
CACNA2D1	BDKRB1	AXL	BLMH
CACNA2D2	BLK	BACE1	BMF
CALCRL	BMP1	BACE2	BMP2
CALM1	BMP4	BAD	BMP6
CAMK2B	BMX	BAZ2A	BMP7
CAMKK2	BRAF	BAZ2B	BNIP3L
CAPN1	BRD2	BCAT2	BRCA1
CAPN2	BRD3	BCHE	BRD4
CAPNS1	BRD4	BCL2	BTG1
CASP1	BRD9	BCL2A1	BTN3A2
CASP3	BRPF1	BCL2L1	BZW1
CASP6	BRSK2	BDKRB1	CA5BP1
CASP7	BTK	BDKRB2	CACNG1
CBR1	C3AR1	BIRC2	CACNG6
CCKAR	C5AR1	BIRC3	CALCA
CCKBR	CA1	BLK	CALM1
CCNA1	CA12	BMP1	CALM3
CCNA2	CA13	BMX	CANX
CCNB1	CA14	BRAF	CAPN1
CCNB2	CA2	BRD2	CAPN2
CCNB3	CA3	BRD3	CAPNS1
CCNC	CA4	BRD4	CAPSL
CCND1	CA5A	BRD9	CAPZA1
CCNE1	CA5B	BRPF1	CAPZA2
CCNE2	CA6	BRS3	CARMN
CCNT1	CA7	BRSK2	CASP1
CCR1	CA9	BTK	CASP3
CCR2	CACNA1B	C3AR1	CASP6
CCR3	CACNA2D1	C5AR1	CASP7
CCR9	CACNA2D2	CA1	CASP8
CD38	CALCA	CA12	CASP9
CD81	CALCRL	CA13	CAST
CDC25A	CALM1	CA14	CAT
CDC25B	CAMK2B	CA2	CAV1
CDC25C	CAMKK2	CA3	CCDC26
CDC7	CAPN1	CA4	CCL11
CDK1	CAPN2	CA5A	CCL19
CDK2	CAPNS1	CA5B	CCL2
CDK4	CASK	CA6	CCL3
CDK5	CASP1	CA7	CCL4
CDK5R1	CASP3	CA9	CCL5
CDK6	CASP6	CACNA1B	CCN2
CDK8	CASP7	CACNA1C	CCNA2
CDK9	CASP8	CACNA1G	CCNB1
CES1	CASR	CACNA1H	CCND1
CES2	CBR1	CACNA1S	CCND3
CETP	CCKAR	CACNA2D1	CCNE1
CFD	CCKBR	CALCRL	CCNJ
CFTR	CCNA1	CALM1	CCR3
CHEK1	CCNA2	CAMK1	CD151
CHRM1	CCNB1	CAMK2B	CD24
CHRM2	CCNB2	CAMK2D	CD274
CHRM3	CCNB3	CAMK2G	CD36
CHRNA7	CCNC	CAMK4	CD40LG
CISD1	CCND1	CAMKK2	CD44
CLK3	CCND2	CAPN1	CD55
CMA1	CCND3	CAPN2	CD6
CNR1	CCNE1	CAPNS1	CD74
CNR2	CCNE2	CASK	CD79A
COMT	CCNT1	CASP1	CD8A
COQ8B	CCR1	CASP2	CDC25A
CPA1	CCR2	CASP3	CDC37
CPT1A	CCR3	CASP6	CDC42
CPT1B	CCR4	CASP7	CDH1
CPT2	CCR9	CASP8	CDH2
CREBBP	CD38	CASP9	CDK19
CRHR1	CD81	CASR	CDK2
CSF1R	CDA	CBFB	CDK3
CSK	CDC25A	CBR1	CDK4
CSNK1D	CDC25B	CBX4	CDKN1A
CSNK2A1	CDC25C	CBX7	CDKN1B
CTNNB1	CDC42	CBX8	CDKN2A
CTRB1	CDC42BPA	CCKBR	CDKN2B-AS1
CTRC	CDC7	CCNA1	CDS1
CTSA	CDK1	CCNA2	CEBPB
CTSB	CDK2	CCNB1	CENPS
CTSD	CDK3	CCNB2	CEP68
CTSH	CDK4	CCNB3	CES1
CTSK	CDK5	CCNC	CES2
CTSL	CDK5R1	CCND1	CES2C
CTSS	CDK6	CCND2	CES2E
CTSV	CDK7	CCND3	CFLAR
CXCR1	CDK8	CCNE1	CHD2
CXCR2	CDK9	CCNE2	CHD7
CYP11B1	CES1	CCNH	CHEK2
CYP11B2	CES2	CCNT1	CHI3L1
CYP17A1	CETP	CCR1	CHKA
CYP19A1	CFD	CCR2	CHMP1A
CYP1A1	CFTR	CCR3	CHRNA3
CYP1B1	CHEK1	CCR4	CHRNA5
CYP26A1	CHEK2	CCR5	CHUK
CYP26B1	CHRM1	CCR8	CILP
CYP2C19	CHRM2	CCR9	CKB
CYP2C9	CHRM3	CD38	CKS1B
CYP3A4	CHRM4	CD81	CLC
CYP51A1	CHRM5	CDC25A	CLDN7
DAO	CHRNA4	CDC25B	CLEC3B
DAPK1	CHRNA7	CDC25C	CLIP3
DAPK3	CHRNB2	CDC42	CLK2
DGAT1	CHUK	CDC42BPA	CLK3
DHCR7	CISD1	CDC45	CM034958-377
DHFR	CLK1	CDC7	CM034958-378
DHODH	CLK3	CDK1	CMET
DNMT1	CMA1	CDK13	CNMD
DNMT3B	CNOT7	CDK2	COL10A1
DRD1	CNR1	CDK3	COL11A1
DRD2	CNR2	CDK4	COL11A2
DRD3	COMT	CDK5	COL1A1
DRD4	COQ8B	CDK5R1	COL1A2
DYRK1A	CPA1	CDK6	COL26A1
DYRK1B	CPT1A	CDK7	COL2A1
ECE1	CPT1B	CDK8	COL3A1
EDNRA	CPT2	CDK9	COL4A2
EDNRB	CREBBP	CDKL3	COL5A1
EGFR	CRHR1	CDKL5	COL5A2
EGLN1	CSF1R	CECR2	COL7A1
EIF4H	CSK	CENPE	COL9A1
ELANE	CSNK1A1	CES1	COL9A2
ENGASE	CSNK1D	CES2	COL9A3
EPAS1	CSNK1G1	CETP	COMP
EPHA1	CSNK1G2	CFD	COMT
EPHA2	CSNK2A1	CFTR	COX1
EPHA3	CTNNB1	CHEK1	COX2
EPHA4	CTRB1	CHEK2	COX5A
EPHA5	CTRC	CHIA	CPNE1
EPHA6	CTSA	CHRM1	CPT1A
EPHB2	CTSB	CHRM2	CRACR2B
EPHB3	CTSD	CHRM3	CREBBP
EPHB4	CTSG	CHRM4	CRH
EPHX1	CTSH	CHRM5	CRP
EPHX2	CTSK	CHRNA1	CS
ERBB2	CTSL	CHRNA2	CSF1
ERBB4	CTSS	CHRNA3	CSF2
ERN1	CTSV	CHRNA4	CSF3R
ESR1	CXCR1	CHRNA5	CSNK2A1
ESR2	CXCR2	CHRNA6	CSTA
ESRRA	CXCR3	CHRNA7	CTNNB1
EZH2	CXCR4	CHRNB1	CTSB
EZR	CYP11B1	CHRNB2	CTSG
F10	CYP11B2	CHRNB3	CTSL
F13A1	CYP17A1	CHRNB4	CX3CL1
F2	CYP19A1	CHRND	CX3CR1
F2R	CYP1A1	CHRNG	CXCL1
F2RL1	CYP1A2	CHUK	CXCL10
F9	CYP1B1	CISD1	CXCL5
FAAH	CYP26A1	CLK1	CXCL6
FABP1	CYP26B1	CLK2	CXCL8
FABP2	CYP27A1	CLK3	CXCL9
FABP3	CYP2A6	CLK4	CXCR3
FABP4	CYP2C19	CMA1	CYBA
FABP5	CYP2C9	CNR1	CYBB
FAP	CYP2D6	CNR2	CYC1
FASN	CYP3A4	COMT	CYP1A1
FBP1	CYP51A1	COQ8B	CYP1A2
FDFT1	CYSLTR1	CPA1	CYP1B1
FFAR1	DAGLA	CPB1	CYP2B6
FGF1	DAO	CPB2	CYP2C19
FGF2	DAPK1	CPT1A	CYP2C9
FGFR1	DAPK2	CPT2	CYP2E1
FGR	DAPK3	CREBBP	CYP3A4
FKBP1A	DBF4	CRHR1	CYP3A9
FKBP5	DBH	CSF1R	CYP4A10
FLT1	DCTPP1	CSK	CYP4A11
FLT3	DGAT1	CSNK1A1	CYSLTR1
FLT4	DHCR7	CSNK1D	CYSLTR2
FNTA	DHFR	CSNK1E	DAP
FNTB	DHODH	CSNK1G1	DCD
FOLR1	DNM1	CSNK1G2	DCN
FOLR2	DNMT1	CSNK1G3	DCT
FPGS	DNMT3B	CSNK2A1	DDIT3
FPR1	DNTT	CSNK2A2	DDX18
FPR2	DPP4	CTRC	DDX5
FTO	DRD1	CTSA	DEFA5
FUCA1	DRD2	CTSB	DEK
FYN	DRD3	CTSC	DENND5A
G6PC	DRD4	CTSD	DGCR2
G6PD	DRD5	CTSG	DIABLO
GABBR1	DSTYK	CTSH	DLG1
GABRA1	DUSP3	CTSK	DLG2
GABRA2	DUT	CTSL	DLG3
GABRA3	DYRK1A	CTSS	DLG4
GABRA5	DYRK1B	CTSV	DLG5
GABRB2	DYRK2	CX3CR1	DLGAP1
GABRB3	ECE1	CXCL8	DLGAP2
GABRG2	EDNRA	CXCR1	DLGAP3
GALR1	EDNRB	CXCR2	DLGAP4
GALR2	EGFR	CXCR3	DLGAP5
GART	EGLN1	CXCR4	DLST
GBA	EHMT1	CYP11B1	DNM1L
GCGR	EHMT2	CYP11B2	DNMT1
GCK	EIF2AK3	CYP17A1	DNMT3A
GLI1	EIF4A1	CYP19A1	DNMT3B
GLI2	EIF4E	CYP1A1	DUSP1
GLO1	ELANE	CYP1A2	DUSP5
GLRA1	ENGASE	CYP1B1	DUSP6
GLRA2	ENPP1	CYP24A1	E2F1
GLUL	ENPP2	CYP26A1	EDNRB
GNRHR	EP300	CYP26B1	EEF1A1
GPBAR1	EPAS1	CYP27A1	EGFR
GPR139	EPHA1	CYP2A6	EGR1
GPR35	EPHA2	CYP2C19	EGR4
GPR88	EPHA3	CYP2C9	EHHADH
GRIK1	EPHA4	CYP2D6	EHMT2
GRIK2	EPHA5	CYP3A4	EIF2S2
GRIN2B	EPHA6	CYP51A1	EIF4EBP1
GRK6	EPHA7	CYSLTR1	ELF4
GRM1	EPHA8	DAGLA	ELN
GRM2	EPHB1	DAO	ELOVL5
GRM4	EPHB2	DAPK1	ENPP2
GRM5	EPHB3	DAPK2	ENSG00000253926
GSK3A	EPHB4	DAPK3	ENSG00000285108
GSK3B	EPHX1	DBF4	ENTPD2
GSR	EPHX2	DCTPP1	ENTPD4
GSTA1	ERBB2	DDAH1	EPDR1
GSTM1	ERBB4	DDOST	EPHX2
GUSB	ERCC5	DHCR7	ERBB2
HAO1	ERN1	DHFR	ERBIN
HCK	ESR1	DHODH	ERCC5
HCRTR1	ESR2	DKK1	EREG
HCRTR2	ESRRA	DMPK	ESR1
HDAC1	ESRRB	DNASE1L3	ETS2
HDAC10	ESRRG	DNM1	EVI2B
HDAC11	EZH2	DNMT1	EYS
HDAC2	EZR	DNMT3A	EZR
HDAC3	F10	DNTT	F2
HDAC6	F11	DPP4	F2R
HDAC7	F13A1	DPP7	F2RL1
HDAC8	F2	DPP8	F9
HIF1A	F2R	DPP9	FAM27E3
HK1	F2RL1	DRD1	FAS
HK2	F3	DRD2	FASLG
HLA-DRB1	F7	DRD3	FAT3
HMGCR	F9	DRD4	FBN1
HPSE	FAAH	DRD5	FBN2
HRAS	FABP1	DSTYK	FBXL3
HRH1	FABP2	DUSP1	FBXO11
HRH3	FABP3	DUSP3	FCER1A
HRH4	FABP4	DUT	FCER1G
HSD11B1	FABP5	DYRK1A	FDFT1
HSD11B2	FAP	DYRK1B	FER
HSD17B1	FASN	DYRK2	FGA
HSD17B2	FBP1	EBP	FGB
HSD17B3	FCER2	ECE1	FGF2
HSP90AA1	FDFT1	EDNRA	FGF9
HSP90AB1	FEN1	EDNRB	FGFR1
HSPA1A	FFAR1	EED	FGG
HTR1A	FGF1	EGFR	FGR
HTR2A	FGF2	EGLN1	FLII
HTR2B	FGFR1	EHMT2	FLOT2
HTR2C	FGFR2	EIF2AK1	FMOD
HTR6	FGFR3	EIF2AK3	FN1
HTR7	FGFR4	EIF4A1	FOS
ICAM1	FGR	EIF4H	FOSB
IDE	FKBP1A	ELANE	FOSL1
IDH1	FKBP4	ELAVL1	FOSL2
IDO1	FKBP5	ELOVL6	FPR1
IGF1R	FLT1	ENPP2	FPR2
IGFBP3	FLT3	EP300	FSIP1
IGFBP5	FLT4	EPAS1	FST
IKBKB	FNTA	EPHA1	FURIN
IKBKE	FNTB	EPHA2	FXR2
IL1B	FOLH1	EPHA3	G0S2
IL2	FOLR1	EPHA4	G6PC3
IL6	FOLR2	EPHA5	G6PD
IL6ST	FPGS	EPHA6	GABARAP
IMPDH1	FPR1	EPHA7	GADD45A
IMPDH2	FPR2	EPHA8	GAL
INSR	FTO	EPHB1	GALR2
IRAK4	FUCA1	EPHB2	GAP43
ITGA2	FYN	EPHB3	GAS6
ITGA4	G6PC	EPHB4	GAST
ITGAL	G6PD	EPHX1	GATD3
ITGAV	GAA	EPHX2	GC
ITGB1	GABBR1	ERAP2	GDF15
ITGB2	GABRA1	ERBB2	GDF5
ITK	GABRA2	ERBB4	GDNF
JAK1	GABRA3	ERCC5	GFAP
JAK2	GABRA4	ERG	GFRA3
JAK3	GABRA5	ERN1	GGT1
JUN	GABRA6	ESR1	GHITM
KCNA3	GABRB2	ESR2	GHR
KCNA5	GABRB3	ESRRA	GJA1
KCNE1	GABRG2	ESRRB	GKN1
KCNH2	GALR1	EZH2	GNB2
KCNJ1	GALR2	EZR	GNLY
KCNJ11	GAPDH	F10	GP1BA
KCNJ3	GART	F11	GP6
KCNJ5	GBA	F12	GPC6
KCNJ6	GCG	F13A1	GPT
KCNK3	GCGR	F2	GPX1
KCNMA1	GCK	F2R	GSDMC
KCNQ1	GDA	F2RL1	GSK3B
KDM1A	GGH	F3	GSN
KDM4C	GIPR	F7	GSR
KDM4D	GLI1	F9	GSTA1
KDM4E	GLI2	FAAH	GSTA2
KDM5A	GLO1	FABP1	GSTM1
KDM5B	GLP1R	FABP2	GSTM3
KDM6B	GLRA1	FABP3	GSTO1
KDR	GLRA2	FABP4	GSTP1
KIF11	GLUL	FABP5	GSTT1
KIT	GNRHR	FADS1	GSTT2
KLK1	GPBAR1	FAP	GTF2I
KLK2	GPR139	FARS2	GTPBP2
KLK5	GPR35	FASN	GUK1
KNG1	GPR84	FBP1	GZMA
LANCL2	GPR88	FDFT1	H2AX
LCK	GRIA1	FEN1	H4C16
LDHA	GRIA2	FFAR1	HBEGF
LGALS3	GRIK1	FFAR4	HBG2
LGALS9	GRIK2	FGF1	HCCAT5
LGMN	GRIN1	FGF2	HCK
LIMK2	GRIN2A	FGFR1	HCLS1
LRRK2	GRIN2B	FGFR3	HCP5
LTA4H	GRK1	FGR	HDAC1
LTB4R	GRK2	FKBP1A	HDAC3
LYN	GRK6	FKBP5	HDAC4
MAOA	GRK7	FLT1	HDC
MAOB	GRM1	FLT3	HDGF
MAP2K1	GRM2	FLT4	HGD
MAP2K2	GRM4	FNTA	HGF
MAP3K20	GRM5	FNTB	HIF1A
MAP3K5	GSK3A	FOLH1	HLA-DQB1
MAP3K7	GSK3B	FOS	HLA-DRB1
MAP3K9	GSR	FOXO1	HLA-G
MAPK1	GSTA1	FPR1	HLCS
MAPK10	GSTM1	FPR2	HMGB1
MAPK11	GSTM2	FTO	HMMR
MAPK14	GSTP1	FUCA1	HMOX1
MAPK3	GUSB	FUT7	HNF1A
MAPK8	GYS1	FYN	HNMT
MAPK9	HAO1	G6PD	HNRNPA1
MAPKAPK2	HCAR2	GAA	HNRNPC
MAPT	HCK	GABBR1	HNRNPDL
MARK1	HCRTR1	GABBR2	HNRNPU
MARK3	HCRTR2	GABRA1	HNRNPUL1
MC4R	HDAC1	GABRA2	HOTAIR
MCL1	HDAC10	GABRA3	HPGD
MDM2	HDAC11	GABRA4	HPGDS
MDM4	HDAC2	GABRA5	HRH1
MERTK	HDAC3	GABRA6	HSF1
MET	HDAC4	GABRB2	HSP90AB1
METAP2	HDAC5	GABRB3	HSPA12A
MGAT2	HDAC6	GABRG2	HSPA1A
MIF	HDAC7	GAPDH	HSPA5
MKNK1	HDAC8	GART	HSPA7
MKNK2	HDAC9	GBA	HSPB1
MME	HEXA	GBA2	HTRA1
MMP1	HEXB	GC	IARS1
MMP12	HIF1A	GCGR	IBSP
MMP13	HIPK4	GCK	ICAM1
MMP14	HK1	GHSR	ICAM3
MMP16	HK2	GLI1	ID2
MMP2	HLA-DRB1	GLI2	IDO1
MMP3	HMGCR	GLO1	IFI30
MMP7	HNF4A	GLP1R	IFNA1
MMP8	HPGD	GLRA1	IFNG
MMP9	HPGDS	GLRA2	IFT27
MPEG1	HPRT1	GLUL	IGF1
MPG	HPSE	GNRHR	IGF2
MPI	HRH1	GPBAR1	IGF2R
MPO	HRH3	GPER1	IGLC2
MTNR1A	HRH4	GPR119	IKBKB
MTNR1B	HSD11B1	GPR139	IL10
MTOR	HSD11B2	GPR142	IL12A
MYLK	HSD17B1	GPR18	IL12B
NAE1	HSD17B14	GPR35	IL12RB2
NAMPT	HSD17B2	GPR39	IL13
NCOR1	HSD17B3	GPR55	IL15
NCOR2	HSF1	GPR88	IL17A
NCSTN	HSP90AA1	GRB2	IL17B
NEK2	HSP90AB1	GRIA1	IL17RA
NEK6	HSP90B1	GRIA2	IL18
NEU4	HSPA1A	GRIK1	IL18R1
NMUR2	HSPA5	GRIK2	IL18RAP
NOS2	HSPA8	GRIN1	IL1A
NOX4	HSPB1	GRIN2A	IL1B
NPC1L1	HTR1A	GRIN2B	IL1R1
NPEPPS	HTR1B	GRK2	IL1R2
NPY2R	HTR2A	GRK3	IL1RAPL2
NPY5R	HTR2B	GRK5	IL1RL1
NQO2	HTR2C	GRK6	IL1RL2
NR1H2	HTR3A	GRK7	IL1RN
NR1H3	HTR6	GRM1	IL2
NR1H4	HTR7	GRM2	IL20
NR1I2	HTT	GRM4	IL21
NR1I3	IARS	GRM5	IL23A
NR3C1	ICAM1	GSK3A	IL23R
NR3C2	IDE	GSK3B	IL24
NR4A1	IDH1	GSR	IL2RA
NR5A1	IDO1	GSTA1	IL2RB
NTRK1	IGF1R	GSTK1	IL2RG
NTRK2	IGFBP1	GSTM1	IL4
NTRK3	IGFBP2	GSTM2	IL4R
NTSR1	IGFBP3	GSTP1	IL5
NUAK1	IGFBP4	GUSB	IL5RA
ODC1	IGFBP5	GYS1	IL6
OGA	IGFBP6	H1F0	IL6R
OPRD1	IKBKB	HAO1	IL6ST
OPRK1	IKBKE	HAO2	IL7
OPRL1	IL1B	HASPIN	IL7R
OPRM1	IL2	HCAR2	ILK
OXER1	IL6	HCK	INSIG1
OXTR	IL6ST	HCN1	IQGAP2
P2RX3	IMPDH1	HCN4	IRF1
P2RX7	IMPDH2	HCRTR1	IRF9
PABPC1	INCENP	HCRTR2	IRS1
PARP1	INSR	HDAC1	ITGA2
PARP10	IRAK1	HDAC10	ITGA2B
PARP14	IRAK4	HDAC11	ITGA5
PARP15	ITGA2	HDAC2	ITGAM
PARP2	ITGA2B	HDAC3	ITGB2
PARP3	ITGA4	HDAC4	ITGB3
PCSK7	ITGAL	HDAC5	ITGB4
PDE10A	ITGAV	HDAC6	JUN
PDE1B	ITGB1	HDAC7	JUNB
PDE1C	ITGB2	HDAC8	JUND
PDE2A	ITGB3	HDAC9	KAT7
PDE3A	ITGB5	HIF1A	KCNE1
PDE3B	ITGB7	HIPK4	KCNH2
PDE4A	ITK	HLA-DRB1	KCNK10
PDE4B	JAK1	HMGCR	KCNK2
PDE4C	JAK2	HMOX1	KCNK4
PDE4D	JAK3	HNF4A	KCNK9
PDE5A	JUN	HPGD	KCNMB4
PDE6D	KAT2A	HPGDS	KCNQ1
PDE7A	KAT2B	HPRT1	KCTD13
PDE9A	KCNA3	HPSE	KDM3A
PDF	KCNA5	HRAS	KDM5B
PDGFRA	KCNE1	HRH1	KIAA1217
PDGFRB	KCNH2	HRH2	KIF20B
PDPK1	KCNJ1	HRH3	KIF21A
PER2	KCNJ11	HRH4	KIF3A
PFKFB3	KCNJ3	HSD11B1	KLRB1
PGD	KCNJ5	HSD11B2	KNG1
PGK1	KCNJ6	HSD17B1	KPNA3
PGR	KCNK3	HSD17B14	LAMC2
PI4KB	KCNK9	HSD17B2	LCK
PIK3C3	KCNMA1	HSD17B3	LCN2
PIK3CA	KCNQ1	HSD17B7	LCT
PIK3CB	KDM1A	HSD3B1	LDLR
PIK3CD	KDM4A	HSD3B2	LEP
PIK3CG	KDM4B	HSF1	LEPR
PIK3R1	KDM4C	HSP90AA1	LIF
PIM1	KDM4D	HSP90AB1	LIG1
PIM2	KDM4E	HSP90B1	LILRA2
PIM3	KDM5A	HSPA1A	LINC00472
PKN1	KDM5B	HSPA5	LINC00976
PLA2G10	KDM5C	HTR1A	LINC00977
PLA2G1B	KDM6B	HTR1B	LINC-PINT
PLA2G2A	KDR	HTR1D	LINC-ROR
PLA2G4A	KIF11	HTR1E	LMNA
PLA2G5	KISS1R	HTR1F	LMO7
PLA2G7	KIT	HTR2A	lnc-FGD3-1
PLAA	KLK1	HTR2B	LOC126863084
PLG	KLK2	HTR2C	LPA
PLK1	KLK5	HTR3A	LTA
PNP	KMT5A	HTR3B	LTC4S
POLA1	KNG1	HTR4	LY9
POLB	LANCL2	HTR5A	LYN
PPARA	LCK	HTR6	MADD
PPARD	LDHA	HTR7	MAP2K1
PPARG	LDHB	HUNK	MAP2K2
PPIA	LDLR	IARS	MAP2K5
PPP1CA	LGALS3	ICAM1	MAP4K4
PPP1CC	LGALS4	ICK	MAPK1
PPP2CA	LGALS8	ICMT	MAPK12
PPP5C	LGMN	IDE	MAPK14
PRCP	LIMK2	IDH1	MAPK3
PREP	LIPC	IDO1	MAPKAPK3
PRKCA	LIPE	IGF1R	MCAM
PRKCB	LIPG	IGFBP1	MCL1
PRKCD	LNPEP	IGFBP2	MCM5
PRKCE	LRRK2	IGFBP3	MCM6
PRKCG	LSS	IGFBP4	MDM2
PRKCH	LTA4H	IGFBP5	MED4
PRKCQ	LTB4R	IGFBP6	MET
PRKDC	LYN	IKBKB	MFN1
PRLHR	MALT1	IKBKE	MIF
PRSS1	MAOA	IL1B	MIR1197
PSEN1	MAOB	IL2	MIR1227
PSEN2	MAP2K1	IL6	MIR1306
PSENEN	MAP2K2	IL6ST	MIR155
PTAFR	MAP2K3	ILK	MIR17
PTGDR	MAP2K4	IMPDH1	MIR199B
PTGDR2	MAP3K1	IMPDH2	MIR21
PTGER1	MAP3K12	INCENP	MIR223
PTGER2	MAP3K20	INSR	MIR26B
PTGER4	MAP3K5	INSRR	MIR29A
PTGES	MAP3K7	IRAK4	MIR31HG
PTGIR	MAP3K8	ITGA1	MIR4306
PTGS1	MAP3K9	ITGA2	MIR495
PTGS2	MAP4K4	ITGA2B	MIR497
PTK2	MAPK1	ITGA4	MIR519D
PTK2B	MAPK10	ITGA5	MIR663B
PTK6	MAPK11	ITGAL	MKI67
PTPN1	MAPK13	ITGAV	MLF2
PTPN11	MAPK14	ITGB1	MMP1
PTPN2	MAPK3	ITGB2	MMP11
PTPN22	MAPK8	ITGB3	MMP13
PTPN6	MAPK9	ITGB5	MMP14
PTPRF	MAPKAPK2	ITGB7	MMP17
PTPRS	MAPKAPK5	ITK	MMP19
PTPsigma	MAPT	JAK1	MMP2
PYGL	MARK1	JAK2	MMP3
PYGM	MARK2	JAK3	MMP7
QPCT	MARK3	JUN	MMP8
RAF1	MARS	KAT2B	MMP9
RARA	MBD2	KCNA3	MOB2
RARB	MC4R	KCNA5	MPO
RARG	MCHR1	KCNE1	MPZL1
RBP4	MCL1	KCNH2	MR1
REN	MDH2	KCNJ1	MRPL46
RET	MDM2	KCNJ11	MS4A2
RHOA	MDM4	KCNJ3	MSH6
ROCK1	ME1	KCNJ5	MT1
ROCK2	MELK	KCNJ6	MT1A
RORA	MERTK	KCNK2	MTA1
RORB	MET	KCNK3	MTOR
RORC	METAP2	KCNK9	MTRF1LP2
RPS6KA2	MGAM	KCNMA1	MTTP
RPS6KA3	MGAT2	KCNQ1	MX1
RPS6KA5	MGLL	KDM1A	MYC
RPS6KB1	MGMT	KDM2A	MYD88
RXRA	MIF	KDM3A	MYF5
RXRG	MKNK1	KDM4A	MYOD1
S1PR1	MKNK2	KDM4C	MYOG
S1PR3	MME	KDM4D	NAA15
SAE1	MMP1	KDM4E	NAA38
SCARB1	MMP10	KDM5A	NAT1
SCD	MMP12	KDM5B	NAT2
SCN10A	MMP13	KDM5C	NCF1
SCN5A	MMP14	KDM6B	NCF2
SCN9A	MMP15	KDR	NCLN
SELE	MMP16	KEAP1	ND1
SELL	MMP2	KHK	ND3
SELP	MMP25	KIF11	NDST2
SERPINA6	MMP26	KISS1R	NDUFS4
SERPINE1	MMP3	KIT	NEFL
SF3B3	MMP7	KLK1	NFE2L2
SGK1	MMP8	KLK2	NFKB1
SHBG	MMP9	KMO	NFKBIA
SHH	MPEG1	KMT5A	NFKBIB
SIGMAR1	MPG	KNG1	NFKBIZ
SIRT1	MPI	LAP3	NGF
SIRT2	MPO	LCK	NGFR
SLC13A5	MST1R	LDHA	NINJ1
SLC19A1	MT-ND4	LDHB	NKG7
SLC22A12	MTNR1A	LDLR	NKX2-1
SLC28A3	MTNR1B	LGALS3	NLRP3
SLC29A1	MTOR	LGALS9	NLRX1
SLC2A1	MYLK	LIMK1	NME6
SLC2A2	NAAA	LIPA	NOLC1
SLC2A3	NAALAD2	LIPE	NOS2
SLC37A4	NAE1	LIPG	NOS3
SLC46A1	NAMPT	LNPEP	NOTCH3
SLC5A1	NCOR1	LRRK2	NOX4
SLC5A2	NCOR2	LSS	NPEPPS
SLC6A1	NCSTN	LTA4H	NPPB
SLC6A15	NEK1	LTB4R	NPR1
SLC6A2	NEK2	LYN	NPY
SLC6A3	NEK6	LYPLA2	NQO1
SLC6A4	NEU4	MAK	NQO2
SLC6A5	NFKB1	MALT1	NR1I2
SLC6A9	NLRP3	MAN1B1	NR3C1
SMO	NMT1	MAN2A1	NR4A3
SNCA	NMUR2	MAOA	NRCAM
SOAT1	NOS1	MAOB	NRF1
SORD	NOS2	MAP2	NUBP2
SORT1	NOX1	MAP2K1	OAS1
SQLE	NOX4	MAP2K2	ODC1
SRC	NPC1L1	MAP2K3	OLR1
SREBF2	NPEPPS	MAP2K4	OPRD1
SSTR1	NPY1R	MAP2K6	OPRK1
SSTR2	NPY2R	MAP2K7	OPRM1
SSTR3	NPY5R	MAP3K1	ORC4
SSTR4	NQO1	MAP3K10	OSM
SSTR5	NQO2	MAP3K11	OSR1
ST6GAL1	NR1D1	MAP3K12	OTC
STAT1	NR1H2	MAP3K13	P2RY1
STAT3	NR1H3	MAP3K14	P2RY12
STAT6	NR1H4	MAP3K15	P4HTM
STS	NR1I2	MAP3K5	PAG1
SYK	NR1I3	MAP3K6	PARP1
TAAR1	NR3C1	MAP3K7	PAX3
TACR1	NR3C2	MAP3K8	PAX6
TACR2	NR4A1	MAP3K9	PCBP1
TACR3	NR5A1	MAP4K2	PCDH17
TAS2R31	NTRK1	MAP4K4	PCNP
TBK1	NTRK2	MAPK1	PCSK1
TBXA2R	NTSR1	MAPK10	PCSK1N
TBXAS1	NUAK1	MAPK11	PCSK7
TDO2	OAT	MAPK13	PDCD10
TEK	ODC1	MAPK14	PDGFB
TERT	OGA	MAPK15	PDLIM5
TGFBR1	OPRD1	MAPK3	PDLIM7
TGFBR2	OPRK1	MAPK8	PDYN
TGM1	OPRL1	MAPK9	PECAM1
TGM2	OPRM1	MAPKAPK2	PEF1
THRA	OXER1	MAPKAPK5	PEPD
THRB	OXTR	MAPT	PER1
TLR9	P2RX3	MARK1	PF4
TNF	P2RX7	MARK3	PF4V1
TNKS	P2RY12	MARS	PFKFB3
TNKS2	P4HTM	MAST1	PFN1
TOP1	PABPC1	MAST3	PHB1
TOP2A	PAK1	MC1R	PHB2
TP53	PAK4	MC4R	PI4KB
TRHR	PARP1	MC5R	PICALM
TRPA1	PARP10	MCHR1	PIK3C2A
TRPM8	PARP14	MCL1	PIK3CA
TRPV1	PARP15	MDM2	PIK3CB
TRPV4	PARP2	MDM4	PIK3CD
TSPO	PARP3	MELK	PIK3CG
TTK	PBRM1	MERTK	PIK3R1
TTR	PCNA	MET	PINK1
TUBB1	PCSK7	METAP1	PITRM1
TXK	PDCD4	METAP2	PITX1
TYK2	PDE10A	MGAM	PLA2G1B
TYMS	PDE1B	MGLL	PLA2G2A
TYR	PDE1C	MIF	PLA2G4A
TYRO3	PDE2A	MINK1	PLA2G6
UBA2	PDE3A	MKNK1	PLAT
UGCG	PDE3B	MKNK2	PLAU
UGT2B7	PDE4A	MLX	PLAUR
VCAM1	PDE4B	MME	PLCD4
VCP	PDE4C	MMP1	PLD2
VDR	PDE4D	MMP12	PLIN2
VEGFA	PDE5A	MMP13	PMAIP1
WEE1	PDE6D	MMP14	PMS2
WNT3	PDE7A	MMP16	POLR2A
WNT3A	PDE9A	MMP2	POMC
XDH	PDF	MMP3	PON1
YES1	PDGFRA	MMP7	POR
	PDGFRB	MMP8	PPARA
	PDK1	MMP9	PPARD
	PDPK1	MPEG1	PPARG
	PER2	MPG	PPARGC1A
	PFKFB3	MPI	PPBP
	PGD	MPO	PPIB
	PGF	MRGPRX1	PPIG
	PGGT1B	MSR1	PPP1R12A
	PGK1	MST1R	PPP1R15A
	PGR	MTAP	PPP1R2
	PHKG2	MT-ND4	PPP4C
	PI4KB	MTNR1A	PRCD
	PIK3C2G	MTNR1B	PRDX2
	PIK3C3	MTOR	PREP
	PIK3CA	MTTP	PRH2
	PIK3CB	MUSK	PRKAA1
	PIK3CD	MYLK	PRKCB
	PIK3CG	MYLK2	PRKCD
	PIK3R1	NAAA	PRKCE
	PIM1	NAE1	PRKN
	PIM2	NAMPT	PRL
	PIM3	NAT1	PRNP
	PIP4K2C	NCOR1	PSAT1
	PIP5K1C	NCOR2	PSD
	PITRM1	NCSTN	PSMC6
	PKM	NEK1	PSMD12
	PKN1	NEK2	PTGDR
	PLA2G10	NEK6	PTGDR2
	PLA2G1B	NEU2	PTGER2
	PLA2G2A	NEU3	PTGER3
	PLA2G4A	NEU4	PTGES
	PLA2G5	NFKBIA	PTGIR
	PLA2G7	NLK	PTGS1
	PLAA	NLRP3	PTGS2
	PLAT	NMT1	PTK2B
	PLAU	NMUR2	PTN
	PLCG1	NOD1	PTP4A1
	PLEC	NOS1	PTPRCAP
	PLG	NOS2	PUM2
	PLK1	NOS3	PURA
	PLK3	NOX4	PUS1
	PLK4	NPBWR1	PVT1
	PNMT	NPC1L1	PWAR1
	PNP	NPEPPS	PXN
	POLA1	NPY1R	PYGL
	POLB	NPY2R	RAB2A
	PON1	NPY5R	RAB40C
	PPARA	NQO1	RABGGTA
	PPARD	NQO2	RAC1
	PPARG	NR0B2	RAF1
	PPIA	NR1D1	RALB
	PPM1B	NR1H2	RANBP2
	PPP1CA	NR1H3	RB1
	PPP1CC	NR1H4	REEP6
	PPP2CA	NR1I2	REG1A
	PPP2R5A	NR1I3	RELA
	PPP5C	NR3C1	REN
	PRCP	NR3C2	RGS7BP
	PREP	NR4A1	RHOG
	PRF1	NR5A1	RIPK1
	PRKACA	NTRK1	RNASE1
	PRKCA	NTRK2	RNASE6
	PRKCB	NTSR1	RND2
	PRKCD	NUAK1	RNF26
	PRKCE	NUDT1	RNU6-1
	PRKCG	OAT	RPL34
	PRKCH	OGA	RPN1
	PRKCI	OGFRL1	RPS16
	PRKCQ	OPRD1	RPS19
	PRKCZ	OPRK1	RPS27A
	PRKD1	OPRL1	RPS6
	PRKDC	OPRM1	RPS6KB1
	PRKG2	OXER1	S100A11
	PRLHR	OXSR1	S100A4
	PROKR1	OXTR	S100B
	PRSS1	P2RX3	SAT1
	PSEN1	P2RX4	SBSN
	PSEN2	P2RX7	SCARB1
	PSENEN	P2RY1	SCFD2
	PSMB5	P2RY12	SCN1B
	PTAFR	PABPC1	SCN9A
	PTGDR	PADI1	SDC4
	PTGDR2	PADI2	SDS
	PTGER1	PADI3	SEC13
	PTGER2	PADI4	SELENOM
	PTGER3	PAK3	SELL
	PTGER4	PAK4	SELP
	PTGES	PAM	SERPINA1
	PTGFR	PARP1	SERPINA3
	PTGIR	PARP10	SERPINB1
	PTGS1	PARP14	SERPINB2
	PTGS2	PARP15	SERPINB5
	PTK2	PARP2	SFPQ
	PTK2B	PARP3	SFTPD
	PTK6	PASK	SI
	PTPN1	PBK	SIAH2
	PTPN11	PBRM1	SIRT1
	PTPN2	PCSK7	SIX6
	PTPN22	PDCD4	SLC13A1
	PTPN6	PDE10A	SLC16A1
	PTPRF	PDE11A	SLC22A1
	PTPRS	PDE1C	SLC22A11
	PTPsigma	PDE2A	SLC22A2
	PYGL	PDE3A	SLC22A6
	PYGM	PDE3B	SLC22A7
	QDPR	PDE4A	SLC22A8
	QPCT	PDE4B	SLC22A9
	RAC1	PDE4C	SLC25A29
	RAF1	PDE4D	SLC25A5
	RARA	PDE5A	SLC2A1
	RARB	PDE7A	SLC2A4
	RARG	PDE8B	SLC6A12
	RASGRP3	PDE9A	SLC6A2
	RBP4	PDF	SLC6A4
	RELA	PDGFRA	SLC7A11
	REN	PDGFRB	SLPI
	RET	PDK1	SMAP2
	RHOA	PDPK1	SMC4
	RIPK1	PEPD	SMURF1
	RNASEH1	PER2	SMURF2
	ROCK1	PFKFB3	SNCA
	ROCK2	PGA5	SNHG12
	RORA	PGD	SNORD118
	RORB	PGF	SNRNP35
	RORC	PGGT1B	SOCS2
	ROS1	PGK1	SOD1
	RPS6KA1	PGR	SOD2
	RPS6KA2	PHF8	SOD2-OT1
	RPS6KA3	PHKG2	SOX9
	RPS6KA4	PHLPP2	SP4
	RPS6KA5	PHOSPHO1	SPAG6
	RPS6KB1	PI4KB	SPARC
	RXRA	PIK3C2G	SPG25
	RXRG	PIK3CA	SPP1
	S1PR1	PIK3CB	SPTAN1
	S1PR2	PIK3CD	SRPX
	S1PR3	PIK3CG	SSR3
	SAE1	PIK3R1	ST1A8
	SCARB1	PIM1	STAB2
	SCD	PIM2	STAMBP
	SCN10A	PIM3	STAT3
	SCN2A	PIN1	STAT5B
	SCN5A	PIP4K2C	STAT6
	SCN9A	PITRM1	STK10
	SELE	PKM	STOX1
	SELL	PKN1	STRN4
	SELP	PKN2	STXBP1
	SERPINA6	PLA2G10	SUGT1P3
	SERPINE1	PLA2G1B	SULT1A1
	SETD7	PLA2G2A	SULT1A3
	SF3B3	PLA2G4A	SUMO1
	SGK1	PLA2G5	SUMO3
	SHBG	PLA2G7	SUN2
	SHH	PLAA	TACC3
	SIGMAR1	PLAT	TAF6
	SIRT1	PLAU	TAP2
	SIRT2	PLAUR	TBC1D10B
	SIRT3	PLD1	TBL1X
	SLC10A2	PLD2	TBX21
	SLC13A5	PLEC	TBXA2R
	SLC16A1	PLG	TBXAS1
	SLC19A1	PLK1	TCF4
	SLC1A3	PLK2	TCIRG1
	SLC22A12	PLK3	TEK
	SLC22A6	PLK4	TERT
	SLC28A2	PNMT	TF
	SLC28A3	PNP	TFAM
	SLC29A1	POLA1	TFE3
	SLC2A1	POLB	TFF2
	SLC2A2	POLR1A	TFG
	SLC2A3	PON1	TGFA
	SLC37A4	PORCN	TGFB1
	SLC46A1	PPARA	TGFB2
	SLC5A1	PPARD	TGFB3
	SLC5A2	PPARG	TGFBR2
	SLC5A4	PPIA	TGIF1
	SLC5A7	PPM1A	THBS1
	SLC6A1	PPOX	THBS2
	SLC6A15	PPP1CA	THBS2-AS1
	SLC6A2	PPP2CA	THBS4
	SLC6A3	PPP5C	THRB
	SLC6A4	PRCP	TIMM17B
	SLC6A5	PREP	TIMP1
	SLC6A9	PRF1	TIMP3
	SLC9A1	PRKAA2	TLR3
	SMARCA2	PRKAB1	TMED9
	SMARCA4	PRKACA	TMEM205
	SMO	PRKAG1	TMOD4
	SNCA	PRKCA	TMSB4X
	SOAT1	PRKCB	TNF
	SOAT2	PRKCD	TNFAIP6
	SORT1	PRKCE	TNFRSF10A
	SPHK1	PRKCG	TNFRSF10B
	SPHK2	PRKCH	TNFRSF10D
	SQLE	PRKCI	TNFRSF11A
	SRC	PRKCQ	TNFRSF11B
	SRD5A1	PRKCZ	TNFRSF18
	SRD5A2	PRKD1	TNFRSF1A
	SREBF2	PRKD3	TNFRSF1B
	SRM	PRKDC	TNFRSF25
	SSTR3	PRLHR	TNFSF10
	ST6GAL1	PRMT1	TNFSF11
	STAT1	PRMT3	TNFSF18
	STAT3	PRMT6	TNNI3
	STAT5B	PRMT8	TNS3
	STAT6	PRNP	TOB1
	STK10	PRPF4	TOMM20
	STK16	PRPF4B	TOP3B
	STK17B	PRSS1	TP53
	STS	PRSS3	TP53I13
	SYK	PRUNE1	TPD52L2
	TAAR1	PSEN1	TRA2B
	TACR1	PSEN2	TRAC
	TACR2	PSENEN	TRAF6
	TACR3	PSMB1	TRAPPC6A
	TAOK1	PSMB2	TRIM21
	TAOK2	PSMB5	TRIT1
	TAOK3	PTAFR	TRP53
	TAS2R31	PTGDR	TRP-AGG2-6
	TBK1	PTGDR2	TRPM4
	TBXA2R	PTGER1	TRP-TGG3-1
	TBXAS1	PTGER2	TRPV1
	TDO2	PTGER3	TSLP
	TEK	PTGER4	TSNAX
	TERT	PTGES	TSPAN3
	TGFB1	PTGES2	TUBA1A
	TGFBR1	PTGFR	TUG1
	TGFBR2	PTGIR	TXNRD1
	TGM1	PTGS1	TYK2
	TGM2	PTGS2	TYMP
	THRA	PTK2	TYR
	THRB	PTK2B	UBA2
	TIE1	PTK6	UBE2A
	TK1	PTP4A3	UBE2B
	TKT	PTPN1	UBE2K
	TLR9	PTPN11	UBE3C
	TNF	PTPN2	UBE4A
	TNKS	PTPN22	UBR3
	TNKS2	PTPN6	UBTD1
	TNNC1	PTPRA	UGT1A1
	TNNI3	PTPRC	UGT1A10
	TNNI3K	PTPRCAP	UGT1A3
	TNNT2	PTPRF	UGT1A6
	TOP1	PTPRG	UGT1A7
	TOP2A	PTPRS	UGT1A8
	TP53	PYGL	UGT2B7
	TRAP1	PYGM	UNG
	TREH	QDPR	UQCRC2
	TRHR	QPCT	USP15
	TRPA1	QPCTL	VAMP1
	TRPM8	RAC1	VAV1
	TRPV1	RAD51	VCAM1
	TRPV4	RAF1	VCAN
	TSPO	RAMP1	VCL
	TTK	RARA	VDAC1
	TTL	RARB	VDR
	TTR	RARG	VEGFA
	TUBB1	RASGRP1	VIP
	TUBB3	RASGRP3	VKORC1
	TXK	RBBP4	VPS4A
	TYK2	RBBP7	VWA1
	TYMP	RBP4	WARS1
	TYMS	RELA	WBP2
	TYR	REN	WIF1
	TYRO3	RET	WNT1
	UBA2	RHOA	XDH
	UBLCP1	RIPK2	XIAP
	UGT2B7	ROCK1	XRCC3
	UQCRB	ROCK2	XRCC6
	UTS2R	RORA	YAP1
	VAV1	RORB	YWHAE
	VCAM1	RORC	YWHAQ
	VCP	ROS1	YWHAZ
	VDR	RPS27	ZFAS1
	VEGFA	RPS6KA1	ZMPSTE24
	WDR5	RPS6KA2	ZNF37A
	WEE1	RPS6KA3	ZNF385A
	WNT3	RPS6KA4	ZSCAN16
	WNT3A	RPS6KA5
	XDH	RPS6KB1
	XIAP	RXRA
	XPO1	RXRB
	YES1	RXRG
	YWHAG	S1PR1
	ZAP70	S1PR2
		S1PR3
		S1PR4
		SAE1
		SBK1
		SCARB1
		SCD
		SCN10A
		SCN2A
		SCN4A
		SCN5A
		SCN9A
		SELE
		SELL
		SELP
		SERPINA6
		SERPINE1
		SF3B3
		SGK1
		SHBG
		SHH
		SIGMAR1
		SIRT1
		SIRT2
		SIRT3
		SLC10A2
		SLC13A5
		SLC16A1
		SLC18A2
		SLC18A3
		SLC1A3
		SLC22A1
		SLC22A12
		SLC22A2
		SLC22A6
		SLC27A1
		SLC27A4
		SLC28A2
		SLC29A1
		SLC2A1
		SLC47A1
		SLC5A1
		SLC5A2
		SLC5A4
		SLC6A2
		SLC6A3
		SLC6A4
		SLC6A5
		SLC6A9
		SLC9A1
		SMARCA4
		SMO
		SMYD2
		SNCA
		SNRK
		SOAT1
		SOAT2
		SORD
		SORT1
		SPHK1
		SPHK2
		SQLE
		SRC
		SRD5A1
		SRD5A2
		SREBF2
		SSTR3
		SSTR4
		ST6GAL1
		STAT1
		STAT3
		STK17A
		STK17B
		STK26
		STK3
		STK33
		STK38
		STK39
		STS
		SUZ12
		SYK
		TAAR1
		TAC3
		TACR1
		TACR2
		TACR3
		TAOK1
		TAOK2
		TAOK3
		TAS2R31
		TBK1
		TBXA2R
		TBXAS1
		TDO2
		TDP1
		TDP2
		TEC
		TEK
		TERT
		TGFBR1
		TGM2
		TH
		THRA
		THRB
		TK1
		TKT
		TLR4
		TLR9
		TNF
		TNK2
		TNKS
		TNKS2
		TNNC1
		TNNI3
		TNNT2
		TOP1
		TOP2A
		TP53
		TRAP1
		TRHR
		TRPA1
		TRPC3
		TRPC6
		TRPM8
		TRPV1
		TRPV3
		TRPV4
		TSPO
		TTK
		TTL
		TTR
		TUBB1
		TUBB3
		TXK
		TYK2
		TYMP
		TYMS
		TYR
		TYRO3
		UBA2
		UBLCP1
		UGCG
		UGT2B7
		UPP1
		UQCRB
		USP47
		USP7
		UTS2R
		VAV1
		VCAM1
		VCP
		VDR
		VEGFA
		WEE1
		WNK2
		WNT3
		WNT3A
		XBP1
		XDH
		XIAP
		YARS
		YES1
		YWHAG
		ZAP70

## Sheet: Table 3
Supplementary Table 3: TSD-PPI
target name	Betweenness_unDir	Degree_unDir	Closeness_unDir
TP53	59741.5	132	0.000729395
SRC	18334.8	112	0.000669792
STAT3	14295.6	96	0.000685401
HSP90AA1	17570.6	84	0.000693481
AKT1	17600.1	86	0.000684463
ESR1	14687.9	76	0.000680735
PIK3CA	7839.32	96	0.000664011
MAPK1	8409.69	86	0.000677048
MAPK3	7867.81	84	0.000671592
CTNNB1	12913.7	70	0.000667557
PIK3R1	7204.28	100	0.000634518
EGFR	8401.31	82	0.000655738
HSP90AB1	8004.39	64	0.000665336
JUN	7622.33	54	0.000656168
PIK3CB	3291.13	90	0.000606428
PIK3CD	3092.44	88	0.000606061
BCL2	8063.37	56	0.000642674
HRAS	5278.75	68	0.000628141
PTK2	4833.49	68	0.000621504
CREBBP	7071.26	44	0.000641026
HIF1A	5987.09	48	0.000635324
CASP3	8939.61	46	0.000620347
AR	7855.7	36	0.000636132
HDAC1	4611.59	52	0.000619579
PTPN11	2090.61	70	0.00059453
MAPK8	2210.48	48	0.000630517
PTGS2	16319.1	32	0.000594177
STAT1	2864.99	44	0.000621504
ERBB2	622.842	44	0.00062422
ABL1	11219.8	40	0.000588928
NCOR1	7093.46	46	0.000589623
PRKCA	5525.1	46	0.000595593
TNF	5865.21	40	0.000604961
MAPK9	1586.83	42	0.000618047
CCND1	1995.7	36	0.000620347
GSK3B	4879.06	38	0.000604595
SIRT1	7832.45	36	0.000595948
ITGB1	9267.56	42	0.000578035
MAPK14	1941.47	42	0.000606428
FYN	5705	44	0.000585138
MAPT	7902.57	36	0.000589275
CDK1	4072.01	50	0.000577034
MAPK11	1413.43	38	0.000605694
CAMK2B	11417.3	26	0.00058548
IL6	2535.65	40	0.000595238
JAK2	745.951	56	0.000571429
MTOR	2627.09	36	0.000600601
RAF1	854.461	42	0.000595948
NR3C1	4931.91	26	0.000607533
BCL2L1	3356.85	32	0.000598802
MDM2	590.473	30	0.000611621
IGF1R	583.988	40	0.000592066
PRKCB	3027.34	42	0.000576701
LYN	1566.04	46	0.000574713
JAK1	792.794	50	0.000569801
PPARG	5203.54	28	0.000592066
KDR	1954.44	40	0.000582072
PRKCD	3055.51	40	0.000573723
PGR	762.901	32	0.000590667
RXRA	8004.64	40	0.000546747
IKBKB	1269.03	24	0.000601685
ESR2	2505.93	26	0.000589623
JAK3	636.878	40	0.000567859
EZH2	1631.07	28	0.000585823
PTPN6	515.19	42	0.000564016
PRKCG	1597.18	34	0.000574053
CDK2	2016.38	40	0.000559284
PLK1	2167.39	34	0.000568828
NCOR2	4330.17	38	0.000551572
CYP19A1	11144	24	0.000549753
BRAF	523.081	30	0.000576369
HDAC2	510.195	26	0.000581058
CCNB1	1148.04	40	0.000550055
CCNA2	974.117	40	0.000550055
MET	99.6346	28	0.000572082
CDK5	1271.41	18	0.000584795
KDM1A	761.276	26	0.000571102
APP	9753.11	34	0.000518941
FGFR1	5581.07	20	0.000561167
PPP2CA	2794.33	26	0.000561167
RHOA	1389.43	28	0.000562746
SYK	169.08	30	0.00056338
PDGFRA	76.2981	30	0.000561167
AURKB	5065.59	24	0.000550661
G6PD	10147.5	16	0.000544662
PDGFRB	62.5833	30	0.000558659
IL1B	1841.38	22	0.000564653
FGF2	2266.58	30	0.000545852
PRKCE	2703.23	30	0.000542005
BRD4	7260	16	0.000547945
LCK	1548.06	22	0.000559284
ITGB2	1598.37	34	0.000536769
CDK4	629.619	26	0.000554939
PARP1	1261.49	22	0.000558036
PPARA	10231.9	16	0.000532198
KIT	924.601	20	0.000561482
CYP3A4	7166.22	50	0.000480769
THRB	1185.07	20	0.000559284
PIK3CG	275.433	26	0.000551876
RPS6KB1	582.059	22	0.000556174
SREBF2	9363.08	10	0.000542888
CDC25C	3157.04	34	0.00052356
MAP2K1	144.724	30	0.000542299
CYP1A1	7125.47	42	0.000490918
PDPK1	1094.96	24	0.000547645
ALK	6141.43	20	0.000534759
DNMT1	183.283	18	0.000562114
KNG1	15900.3	34	0.000466418
TRPV1	7812.53	12	0.000538793
PTPN1	129.08	22	0.000550964
IGFBP3	1511.31	10	0.000565931
PSEN1	4306.9	22	0.000531915
MAP2K2	107.733	28	0.000536193
IL6ST	26.7308	24	0.000543183
PTK2B	352.289	24	0.000541712
ICAM1	1165.46	26	0.000534759
CHEK1	625.352	22	0.000543774
CALM1	2187.67	16	0.000548546
FKBP5	346.929	16	0.000554939
MAP3K7	265.581	26	0.000536769
ATM	233.216	20	0.000547645
SLC6A3	6271.56	18	0.000526316
MMP9	3743.53	22	0.000527983
AHR	3865.97	8	0.000553097
ROCK1	965.216	18	0.000545852
PRKCQ	400.667	24	0.000536193
AURKA	436.949	20	0.000541712
EZR	605.647	16	0.000547945
PIK3C3	1011.89	10	0.000555247
TYK2	25.2791	22	0.000535906
PRKDC	99.7626	12	0.000554017
IL2	3281.45	16	0.000529942
ROCK2	749.363	16	0.000539374
MMP2	2806.39	14	0.000534759
CCNE1	162.093	18	0.000536481
CCNA1	82.7671	18	0.000536481
MCL1	1046	8	0.000550964
TBK1	291.553	14	0.000542888
ITK	129.442	22	0.000528541
ACE2	11159	20	0.000487092
GSK3A	730.425	10	0.000546448
INSR	192.771	20	0.000529661
CYP2C9	4764.24	30	0.000492854
HDAC6	293.58	12	0.000543478
NR4A1	734.185	10	0.000545256
THRA	736.342	16	0.000533618
NTRK2	2830.74	16	0.000524109
TGFBR2	552.513	12	0.000540249
LRRK2	2433.4	12	0.000531632
ITGA4	97.4969	20	0.00052521
ITGA2	132.067	22	0.000520021
NOS2	2419.39	8	0.000536193
CDC25A	152.558	34	0.00049505
PDE3B	7921.64	6	0.000515464
STAT6	95.6367	16	0.000527704
CYP2C19	5300.83	24	0.000491642
CDC25B	201.663	26	0.000507872
LGALS3	1165.23	10	0.000532481
PPP1CC	1182.03	20	0.000511247
NTRK1	873.815	16	0.000518135
SIRT2	644.055	12	0.000526316
HCK	29.7429	14	0.000524934
PTK6	193.361	10	0.00053135
SLC2A2	692.773	6	0.000536193
PLA2G4A	1322.68	12	0.000521648
ITGAV	59.1956	14	0.000523013
BTK	365.002	18	0.000513875
VCAM1	566.265	22	0.000505561
CAPN1	613.435	8	0.000530504
CAPN2	613.435	8	0.000530504
CD38	1163.23	14	0.000514668
TOP1	211.099	6	0.000533049
CSK	737.241	10	0.000521921
MAP3K5	250.857	14	0.000515996
CTSB	931.268	16	0.000508906
APEX1	288.739	6	0.000529381
PER2	2867.79	14	0.000504286
FLT1	86.3586	14	0.000514668
AKR1C3	3121.22	34	0.000465549
PNP	5734.62	14	0.000490436
KCNH2	1710.48	8	0.000515464
HDAC3	63.7437	16	0.000507099
GRIN2B	229.311	8	0.000520562
VCP	1049.79	10	0.000512295
PPP5C	37.62	8	0.000520021
CTSS	977.549	14	0.000504032
ADK	10815.5	28	0.000434783
EGLN1	116.123	10	0.000509944
CFTR	730.564	8	0.000510465
KLK2	5097.98	6	0.000495786
TGFBR1	72.5626	6	0.000515464
CCNB2	131.605	28	0.000473261
DAPK1	50.25	8	0.000509684
IRAK4	165.492	10	0.000503778
PPP1CA	374.763	16	0.000490918
ALOX5	2188.61	18	0.000479157
CTSL	298.139	12	0.000496524
EPAS1	69.8851	8	0.000504796
ERBB4	14.0394	18	0.000554017
DRD2	3273.15	12	0.000482625
UGT2B7	2580.42	24	0.000462107
CDK6	19.3742	18	0.000483325
WNT3A	15.5794	6	0.000505306
SNCA	1535.82	12	0.000488043
PTGS1	156.515	16	0.000483092
TOP2A	1864.83	24	0.000461255
CASP7	98.1128	10	0.00049334
EPHA2	154.644	6	0.000498008
TRPV4	1075.87	14	0.000479157
ALOX15	266.479	14	0.000481464
NR3C2	1781.73	6	0.000489716
HDAC7	27.6194	6	0.00049505
ATIC	6558.52	16	0.000448833
COMT	3738.06	18	0.000456204
GRM1	4817.59	12	0.000462321
LDHA	1117.88	6	0.000487092
CYP11B2	3212.23	20	0.000452284
GRM5	2835.49	10	0.000465766
CDK5R1	116.666	8	0.000480077
ERN1	372.407	8	0.000478927
CYP17A1	366.17	20	0.000456621
HSD17B2	366.136	20	0.000456621
ABCC1	0	2	1
ABCG2	0	2	1
AVPR1A	0	2	1
AVPR2	0	2	1
C3AR1	0	2	1
C5AR1	0	2	1
DAO	0	2	1
HAO1	0	2	1
FTO	0	2	1
MC4R	0	2	1
GLRA1	0	2	1
SLC6A5	0	2	1
GRIK1	0	2	1
GRIK2	0	2	1
HCRTR1	0	2	1
HCRTR2	0	2	1
HTR6	0	2	1
HTR7	0	2	1
MTNR1A	0	2	1
MTNR1B	0	2	1
P2RX3	0	2	1
P2RX7	0	2	1
PIM1	0	2	1
PIM2	0	2	1
PYGL	0	2	1
PYGM	0	2	1
SAE1	0	2	1
UBA2	0	2	1
SERPINA6	0	2	1
SHBG	0	2	1
RXRG	274.62	14	0.000465983
CSNK1D	262.032	6	0.000479157
SCN5A	622.591	10	0.000469043
CASP6	72.8168	6	0.000478469
HTR1A	4703.97	8	0.000455996
PARP2	96.399	8	0.000474383
SCARB1	955.557	8	0.000468604
CBR1	2928.41	18	0.000441696
GLI2	1136.28	8	0.000467071
SMO	1177.65	10	0.000462963
PTGES	845.418	6	0.000471476
REN	3737.65	14	0.00044484
CASP1	169.222	8	0.000470146
SELL	226.438	12	0.000462321
ADORA2A	2358.29	10	0.000457038
SGK1	319.079	8	0.000468384
PKN1	1109.94	8	0.000464037
RARA	196.404	12	0.000459982
NTRK3	1123.52	8	0.000462963
MAOB	2159.17	16	0.000443459
PPARD	1046	8	0.00045977
CYP11B1	211.31	18	0.000443459
FKBP1A	12.8343	6	0.000468384
MAOA	1735.09	16	0.000439174
HSD17B1	69.0061	14	0.000448632
HSD17B3	61.8478	16	0.00044484
GCK	1115.31	12	0.000447427
NR1H4	1046	6	0.000458505
NR1H3	78.3295	8	0.000458505
HK2	2459.42	16	0.000433651
TRPA1	620.247	8	0.000455581
SLC2A1	12.5746	6	0.000532198
MPO	1026.79	8	0.000452284
FGF1	12.2427	8	0.000468604
PSEN2	104.966	14	0.000441891
NR1I2	879.369	4	0.000456204
NR1I3	879.369	4	0.000456204
HK1	1418.76	14	0.000433463
TLR9	16.4778	6	0.000453515
FABP4	344.592	4	0.000455581
CPT1A	6334.92	8	0.000423729
ADCY1	1104.2	4	0.00045045
BACE2	158.363	4	0.000454133
MYLK	21.9198	4	0.000454545
EPHX1	142.697	16	0.000431779
AGTR1	6073.94	14	0.000411692
ANPEP	82.8537	4	0.000453104
KCNJ6	2501.12	8	0.000434783
DHCR7	2383.87	12	0.000425713
CYP51A1	2371.75	12	0.000425713
APH1A	23.7206	12	0.000434594
NCSTN	23.7206	12	0.000434594
PSENEN	23.7206	12	0.000434594
CYP1B1	504.952	20	0.000417885
HMGCR	1769.36	12	0.000426985
GSR	498.359	6	0.000442478
G6PC	1046	10	0.0004329
CD81	71.8582	4	0.000447628
SLC6A4	2329.96	14	0.000420168
TRPM8	161.07	8	0.000438404
PTPN22	1046	6	0.000438212
RORA	1665.38	10	0.000426621
AKR1C1	463.847	18	0.000416493
GBA	2088	8	0.000427716
DHFR	3432.19	14	0.000411184
BACE1	72.1496	6	0.000439174
GSTM1	246.112	12	0.000426621
GSTA1	246.112	12	0.000426621
RORC	417.174	6	0.00043611
DRD4	1194.43	8	0.000428816
IKBKE	11.1536	6	0.000501505
ACHE	1305.82	4	0.00043535
AKR1B1	1586.87	14	0.000414938
CCNT1	2088	6	0.000426803
CYP26A1	1046	10	0.000422297
FABP1	2113.37	8	0.000419463
HSD11B1	566.449	12	0.000414938
CNR1	2188.79	10	0.000411353
MMP1	10.4563	6	0.000429553
SORT1	16.4782	6	0.000422654
EPHX2	1198.21	4	0.000421585
IDE	694.773	4	0.000421763
ARG1	1046	4	0.000419111
CXCR2	8	6	0.142857
ACE	21.4203	10	0.000410341
CHRM1	1383.78	10	0.000404367
HSD11B2	138.047	8	0.000412541
PTPRF	9.7028	8	0.000513084
CES1	654.982	8	0.000407498
AKR1B10	713.252	12	0.000399521
IDO1	1076.34	10	0.00040032
RORB	10.5286	6	0.000409836
TTR	1046	4	0.000408497
FPR2	1046	4	0.000408497
KIF11	7.71562	20	0.000453721
CHRM3	327.493	6	0.000403388
ITGAL	8.03492	16	0.000457875
GABBR1	1534.9	10	0.000389712
TYMS	1122.97	6	0.000398724
MME	630.049	6	0.000398883
TERT	8.51459	10	0.000571102
CPA1	2	4	0.5
PTGER4	2	4	0.5
HTR2A	1814.28	10	0.000384911
ACACB	5491.22	12	0.000365097
AOC3	94.297	8	0.000392465
PRCP	1046	6	0.000392003
GART	2117.07	6	0.000386548
AMPD3	236.207	12	0.000381825
AMPD1	236.207	12	0.000381825
AMPD2	236.207	12	0.000381825
ATP12A	522	6	0.000391543
ATP4A	522	6	0.000391543
ALDH2	726.069	12	0.000379219
NPC1L1	173.831	4	0.000392003
CES2	29.0688	6	0.00038835
SORD	433.265	8	0.000380952
OPRD1	3126	4	0.000375799
EDNRA	853.366	8	0.000376648
EDNRB	853.366	8	0.000376648
GUSB	95.4982	8	0.000378358
CHRM2	244.865	6	0.000379795
GRM4	529.28	4	0.000376506
F2	3238.6	16	0.000343171
BDKRB1	331.366	4	0.000376223
GALR1	1046	4	0.00036846
ADRA1A	0	4	0.5
ADRA1B	0	4	0.5
ADRA1D	0	4	0.5
FDFT1	2088	10	0.00035014
AKR1A1	54.3735	6	0.000365497
CCR2	4	8	0.166667
CXCR1	4	8	0.166667
PTPN2	5.67777	14	0.000523834
SQLE	10.1292	10	0.000350018
PDE2A	1046	4	0.000354484
CPT1B	26.0893	6	0.000351494
CDK8	1046	4	0.000349162
HTR2C	153.599	6	0.00034638
SERPINE1	2088	4	0.000339213
F2R	248.977	6	0.000335796
GRM2	185.649	4	0.000338983
GABRA1	0	6	0.333333
GABRB2	0	6	0.333333
GABRB3	0	6	0.333333
GABRG2	0	6	0.333333
DNMT3B	4.23797	10	0.000486145
CSNK2A1	4.39831	8	0.000546747
MKNK1	4.26522	8	0.000506329
CTRC	0	2	0.333333
CTRB1	0	2	0.333333
PTGER1	0	2	0.333333
PTGER2	0	2	0.333333
OPRM1	2090	6	0.000314465
FLT3	3.44778	10	0.000529101
ACLY	1046	8	0.000307031
ACACA	522	8	0.000307031
FASN	522	8	0.000307031
YES1	3.54924	6	0.000525762
KCNJ1	3.41053	4	0.000411523
FLT4	2.85407	8	0.000493097
CDK9	3	6	0.000426621
FNTA	1046	4	0.000296121
PLG	1046	4	0.000288268
KDM4C	2.39167	4	0.000482625
FGR	1.81938	8	0.000478698
WEE1	0.872222	16	0.000465549
CCR1	0	6	0.125
CCR3	0	6	0.125
AKR1C4	1.83513	4	0.000378358
CCNE2	0.882787	12	0.000449843
POLB	1	6	0.000432339
BRD2	1	6	0.000426257
CCNB3	0.311111	12	0.000451875
FBP1	0.666667	8	0.000353857
MPI	0.666667	8	0.000353857
NEK2	0	14	0.000451467
MIF	0	2	0.0909091
AXL	0.669734	6	0.000501002
ALOX12	0	12	0.000470588
TTK	0	12	0.000449035
TXK	0	10	0.000498008
SELP	0	10	0.000437637
SELE	0	10	0.000437637
APH1B	0	10	0.00041684
IMPDH2	0	10	0.000367242
IMPDH1	0	10	0.000367242
RPS6KA5	0.105263	8	0.000506329
CTSD	0	8	0.000496032
NAMPT	0	8	0.000475285
RARG	0	8	0.000425713
RARB	0	8	0.000425713
CYP26B1	0	8	0.000422119
STS	0	8	0.000408163
AGTR2	0	8	0.00040016
MAPKAPK2	0.105263	6	0.000509165
MDM4	0	6	0.000529381
RPS6KA3	0	6	0.000514403
RPS6KA2	0	6	0.000514403
DAPK3	0	6	0.000502513
MKNK2	0	6	0.000501505
CTSK	0	6	0.000488759
NR1H2	0	6	0.000425532
KCNE1	0	6	0.000420345
KCNQ1	0	6	0.000420345
LGMN	0	6	0.000407
GLI1	0	6	0.000396511
SHH	0	6	0.000396511
AKR1C2	0	6	0.000380518
KCNJ3	0	6	0.000363108
KCNJ5	0	6	0.000363108
PFKFB3	0	6	0.000353732
CDC7	0.2	4	0.000433276
BCL2A1	0	4	0.000509165
HSPA1A	0	4	0.000509165
WNT3	0	4	0.00049505
PI4KB	0	4	0.000490436
CTSH	0	4	0.000488281
CTSV	0	4	0.000488281
CA9	0	4	0.000477099
PARP3	0	4	0.000468604
KDM5B	0	4	0.000468604
PLA2G2A	0	4	0.000462107
EPHA1	0	4	0.000454339
EPHA4	0	4	0.00045045
EPHB2	0	4	0.00045045
BRD3	0	4	0.000426076
LIMK2	0	4	0.000424809
ELANE	0	4	0.000422654
CAPNS1	0	4	0.000415455
PDE3A	0	4	0.000414422
MMP3	0	4	0.000413907
KLK1	0	4	0.000409668
LTA4H	0	4	0.000383289
ALOX5AP	0	4	0.000383289
ADORA1	0	4	0.000375094
ADORA3	0	4	0.000375094
FPGS	0	4	0.000358809
PDE1B	0	4	0.000354359
PDE1C	0	4	0.000354359
ASAH1	0	4	0.00034965
UGCG	0	4	0.00034965
SIGMAR1	0	4	0.000348311
CPT2	0	4	0.000346981
ATP4B	0	4	0.000325098
HTR2B	0	4	0.000320513
ECE1	0	4	0.000314762
F10	0	4	0.000291036
F9	0	4	0.000291036
SCD	0	4	0.00026462
BMX	0	2	0.000504541
SLC5A1	0	2	0.000488281
CSF1R	0	2	0.000476417
KDM5A	0	2	0.000467946
ADAM17	0	2	0.000459559
PLA2G10	0	2	0.000453309
TUBB1	0	2	0.00045045
MARK1	0	2	0.00045045
EPHB3	0	2	0.000450248
EPHA3	0	2	0.000450248
EPHB4	0	2	0.000450248
EPHA6	0	2	0.000450248
EPHA5	0	2	0.000450248
KDM6B	0	2	0.00044843
CMA1	0	2	0.000448029
TYR	0	2	0.000443066
IGFBP5	0	2	0.000436681
HDAC10	0	2	0.000428082
TNKS2	0	2	0.000427716
OGA	0	2	0.000427533
BRD9	0	2	0.000425894
TEK	0	2	0.000424628
PGD	0	2	0.000423908
MMP14	0	2	0.000417885
MMP7	0	2	0.000417885
MERTK	0	2	0.000416493
DRD1	0	2	0.000412712
MARK3	0	2	0.000411015
NAE1	0	2	0.000408163
PLAA	0	2	0.00040404
XDH	0	2	0.00039032
PGK1	0	2	0.000388199
PRKCH	0	2	0.000383142
MAP3K20	0	2	0.000373413
PTPRS	0	2	0.000372717
CALCRL	0	2	0.000372301
FABP5	0	2	0.000370645
GPBAR1	0	2	0.000369822
ADORA2B	0	2	0.000368868
HLA-DRB1	0	2	0.000356506
PDE4B	0	2	0.000354233
PDE4D	0	2	0.000354233
PDE10A	0	2	0.000354233
PDE4A	0	2	0.000354233
PDE7A	0	2	0.000354233
SLC37A4	0	2	0.000352983
DRD3	0	2	0.000350263
ATP2A1	0	2	0.000348797
SOAT1	0	2	0.000348189
DGAT1	0	2	0.000345901
FABP2	0	2	0.000343997
FABP3	0	2	0.000343997
ODC1	0	2	0.000343761
FAAH	0	2	0.000338524
CNR2	0	2	0.000338524
FPR1	0	2	0.000336587
RBP4	0	2	0.000336587
TDO2	0	2	0.000331016
PREP	0	2	0.000325309
KCNJ11	0	2	0.000323729
GALR2	0	2	0.000308928
PDE5A	0	2	0.000299043
CCNC	0	2	0.000295247
F13A1	0	2	0.000290951
GRK6	0	2	0.000270051
IDH1	0	2	0.00026455
FNTB	0	2	0.00025641
MMP13	0	2	0.000250501

## Sheet: Table 4
Supplementary Table 4: YJD-PPI
target name	Betweenness_unDir	Degree_unDir	Closeness_unDir
TP53	102432	184	0.000493097
PRKACA	64481.1	118	0.000455581
SRC	31936.1	134	0.000453721
AKT1	25409.4	124	0.000471698
HSP90AA1	24710.3	108	0.000466636
MAPK1	21192.9	114	0.000465333
MAPK3	19939.4	112	0.000463177
ESR1	27615	90	0.000470367
STAT3	19557.9	104	0.000462535
EP300	27297.2	88	0.000460617
PIK3CA	13451.3	118	0.000447828
CTNNB1	20701.2	88	0.000461681
PIK3R1	12453.6	122	0.000426803
EGFR	14367.9	92	0.000448632
JUN	13329.1	70	0.000465983
HSP90AB1	10378.1	86	0.000449236
HIF1A	18456.9	58	0.00044405
PTK2	10213.1	80	0.00043573
PIK3CB	5540.52	108	0.000415628
HDAC1	11815.9	80	0.000429553
PIK3CD	5247.5	106	0.000415455
MAPK8	8725.93	72	0.000438596
RELA	5780.08	60	0.000446828
NFKB1	5719.48	60	0.000445434
CREBBP	8004.62	62	0.000439754
BCL2	12048.3	64	0.000429923
AKT2	4943.01	72	0.000433088
CASP3	10547.1	56	0.000426439
SIRT1	16009.7	50	0.000422119
AR	8054.44	44	0.000439367
GSK3B	7276.42	56	0.000426985
ITGB1	15879.7	56	0.000412712
APP	26907.8	46	0.000399521
IL6	14472.4	50	0.000416146
MAPK9	3274.11	64	0.000421053
MAPK14	4903.95	64	0.000417885
PLCG1	6202.85	72	0.000407166
NCOR1	12730.6	62	0.000404531
PTGS2	24803.7	36	0.000404858
PTPN11	2639.53	74	0.000405844
STAT1	2998.98	50	0.00042735
RAF1	3517.07	60	0.000417188
CCND1	4096.82	50	0.000424989
MAPK13	3473.69	58	0.000416493
MAPK11	3473.69	58	0.000416493
ABL1	18652.8	46	0.000402091
GAPDH	19768.3	28	0.00041632
TNF	7523.64	54	0.000412371
PRKCA	7485.79	56	0.000409836
MAPT	10591.2	42	0.000412882
CDK1	7541.08	62	0.000397456
PPARG	9395.48	40	0.000413565
JAK2	5747.29	68	0.00039185
ERBB2	985.317	44	0.000421585
HSPA8	4704.71	42	0.000417014
CAMK2B	14415	36	0.000406339
FYN	7781.31	54	0.000396511
IGF1R	2238.35	44	0.000413394
MTOR	5034.7	44	0.00040833
MDM2	1447.66	40	0.000417711
IKBKB	2142.32	44	0.0004095
EZH2	2919.99	42	0.000409165
PRKCB	5278.36	50	0.000397772
PGR	2154.8	38	0.000413052
CHUK	2387.3	50	0.000399202
NR3C1	4894.66	32	0.000411523
ESR2	4776.27	30	0.000412541
BCL2L1	4099.56	40	0.000403551
KDR	3499.65	48	0.000396668
HDAC2	1828.41	42	0.000404694
CDK2	4639.55	52	0.000389712
CDC42	2974.59	48	0.000395883
LYN	3224.34	52	0.000389408
PRKCD	3855.73	44	0.000395257
PRKCG	3212.55	42	0.000395883
PKM	11350.7	22	0.000400962
JAK1	909.416	56	0.000385802
RHOA	1973.12	36	0.000401445
RXRA	12185.7	42	0.000378788
PPP2CA	5649.63	40	0.000391389
PLK1	3542.39	40	0.000394322
PRKCZ	732.702	30	0.000407498
NCOR2	8816.01	50	0.000375094
G6PD	14973	22	0.000389864
CDC25C	7512.15	44	0.000381388
CCNA2	3035.11	52	0.000381098
SMARCA4	3839.16	38	0.000392157
BRAF	866.585	32	0.000402576
PTPN6	902.35	46	0.000388651
STAT5B	1609.98	38	0.000393856
JAK3	3119.35	44	0.000385356
MAP2K1	1042.45	42	0.000390625
VAV1	1899.85	44	0.000386847
PCNA	9147.52	30	0.000385505
KAT2B	2346.58	30	0.000396354
HTT	4431.55	22	0.00040016
RPS6KB1	2073	28	0.000397772
PPARA	14474	18	0.000385208
CCNB1	2129.49	48	0.00037594
PSEN1	6431.65	28	0.000386847
IL1B	2823.72	34	0.000387147
CYP19A1	15832.1	28	0.000369822
BRD4	8409.51	24	0.000385654
CALM1	11064.2	28	0.000377501
FGFR1	9469.8	24	0.000383436
CXCR4	19058.9	24	0.000367512
KDM1A	2171.6	32	0.000387447
ENPP1	13718.2	48	0.000352113
MAP2K2	585.558	36	0.000384763
NOS1	5979.05	24	0.000386997
NR4A1	1482.69	16	0.000401768
ITGB2	2342.12	46	0.000371885
CDK5	1584.58	20	0.000396197
FGF2	3904.6	38	0.000375516
BAD	579.072	26	0.000390625
MAP3K7	2306.34	42	0.000372578
HSPA5	6375.92	24	0.000382409
PRKCQ	994.987	34	0.000381825
CASP8	1116.12	30	0.000383583
ATM	1309.96	30	0.000383142
MET	106.498	28	0.000386698
DNMT1	2131.36	28	0.000383142
PDPK1	1470.68	32	0.000379075
EZR	1074.47	20	0.000389105
PDGFRB	537.157	32	0.000378788
MAP3K5	914.279	26	0.00038373
ROCK1	1431.74	28	0.000380807
AURKB	3583.86	28	0.000377216
CDK4	1034.67	32	0.000377501
ICAM1	2022.19	30	0.000377644
ITGA2	823.499	30	0.000378788
HSPB1	1951.5	20	0.000385505
TRPV1	8577.1	14	0.000379939
SYK	171.39	34	0.000375094
CYP1A2	10315.5	44	0.000348797
PDGFRA	67.9212	30	0.000378644
PIK3CG	442.775	32	0.00037594
PARP1	1992.29	26	0.000378788
GSTP1	7975.88	20	0.000374111
SLC9A1	2419.18	24	0.000379507
GRIN2A	3547.04	24	0.000377501
SREBF2	15549.9	12	0.000367782
KAT2A	763.675	20	0.00038432
PRKCE	2624.37	34	0.000367918
MAP2K4	277.841	28	0.000375094
RIPK1	878.347	24	0.000377786
ERBB4	33.2937	22	0.000380518
ROCK2	1128.6	26	0.000374813
TGFB1	1702.06	22	0.000377358
THRB	1656.14	20	0.000378644
MAP2K3	6116.86	34	0.000358295
TERT	71.0968	12	0.000388651
CYP3A4	8648.57	62	0.000328084
CHEK1	1286.06	28	0.000371471
LCK	1284.13	28	0.000371471
CHEK2	2801.27	26	0.000370782
YWHAG	932.409	20	0.000379363
KNG1	16949.7	42	0.000332557
MMP9	8443.02	26	0.00036062
IGFBP3	1973.41	10	0.000385802
DPP4	15837.9	24	0.00034904
CYP1A1	6899.39	54	0.000334896
FKBP4	834.889	20	0.00037594
KIT	1034.31	20	0.000375516
SIRT2	1897.94	16	0.000377786
PTPN1	165.663	22	0.000374813
FKBP5	397.269	20	0.000376223
TBK1	285.724	22	0.000374532
GRIA1	4000.72	22	0.000368324
GRIN2B	785.308	18	0.000377074
GSK3A	634.846	14	0.000380952
PPP1CC	2385.74	30	0.000362845
SPHK2	2413.45	22	0.000370096
HDAC6	454.639	14	0.000380084
SLC6A3	9219.04	18	0.000361141
HDAC4	781.91	20	0.000372995
PTK2B	370.407	24	0.000369822
STAT6	247.434	20	0.000373552
ZAP70	1555.53	32	0.000360101
XIAP	290.901	22	0.00037092
PRKDC	580.108	16	0.000375657
ACE2	8898.68	24	0.000354233
AURKA	665.787	24	0.000366972
CFTR	1662.91	14	0.000374392
CSNK1A1	82.9809	12	0.000378788
IL6ST	65.8306	24	0.000366972
ITGB3	547.63	28	0.000362188
ALK	5453.98	20	0.000361272
NTRK2	4476.1	16	0.000366166
PNP	7424.61	26	0.000351865
AHR	3143.62	8	0.000375516
SPHK1	4304.24	22	0.00036049
TGFBR2	590.476	14	0.000372856
SNCA	3312.34	18	0.000364564
HDAC3	614.782	26	0.000361402
NLRP3	423.995	16	0.00037092
ITGA4	88.5717	26	0.000362188
ITK	201.558	28	0.000359971
HSP90B1	151.481	14	0.000372995
PLA2G4A	3130.36	14	0.000368053
TYK2	33.1751	24	0.000363769
CD38	2829.74	20	0.000362056
CYP2C9	4359.56	42	0.000338983
ITGAV	138.317	24	0.000361795
PDE3B	4442.8	12	0.000365764
MCL1	3088	8	0.000370508
ALB	10803.8	18	0.000348189
APEX1	841.717	10	0.000371471
CCNE1	432.763	20	0.000362713
ITGB7	71.2688	22	0.000361402
GYS1	3974.51	14	0.000361925
IL2	1480.39	18	0.000362056
MMP2	4091.47	16	0.000359324
VCAM1	1544.43	26	0.000354108
CDC25B	505.736	30	0.000351741
LRRK2	991.517	16	0.000363636
ITGB5	222.917	22	0.000359324
EHMT2	240.187	18	0.000362976
NOS2	1726.36	12	0.000365898
PAK1	903.911	16	0.00036324
PLG	11293.9	18	0.000343997
GRIA2	338.904	16	0.000363769
CCNA1	87.4991	18	0.000362319
VCP	1634.06	16	0.000361533
PIK3C3	1002.78	10	0.000368053
CDC25A	298.591	40	0.00034118
INSR	234.011	20	0.000359454
MALT1	87.0422	22	0.000357526
IRAK1	285.043	18	0.00036049
PRKG2	1485.86	22	0.000354736
CYP2C19	9684.03	32	0.000331565
BTK	648.96	26	0.000351989
PPP1CA	993.708	26	0.00035137
PLK3	60.2185	6	0.000371333
MAP3K1	116.767	20	0.00035791
LDHA	1899.57	14	0.00036049
ITGA2B	281.065	16	0.000360881
FGFR2	152.452	18	0.000359066
THRA	907.055	16	0.000359195
MAP3K8	21.3736	16	0.000359712
LGALS3	1698.44	10	0.00036245
CSNK1D	1860.37	12	0.000360231
HPRT1	8575.39	38	0.000324675
SMO	2176.3	16	0.000355366
FGFR3	132.133	16	0.000358423
NTRK1	1328.27	20	0.000352609
HCK	27.7419	14	0.000359971
PTK6	109.999	10	0.000363108
LIPE	8768.19	8	0.000350263
SLC2A1	42.9305	6	0.000366032
SLC2A2	935.633	6	0.000363504
PIP5K1C	222.407	22	0.000349162
ADCY5	4423.24	8	0.00035461
ATR	187.629	10	0.000358938
GLI1	1006.69	10	0.000356379
TOP1	112.013	6	0.000361402
CAPN1	886.804	8	0.000358166
CAPN2	886.804	8	0.000358166
KCNJ6	2336.29	12	0.000351865
NQO1	2901.71	4	0.000358038
SCN5A	524.073	12	0.000354484
CYP2A6	3392.84	40	0.000323729
CTSB	1522.6	18	0.000346981
AKR1C3	4118.69	42	0.000320307
PER2	1676.29	16	0.000348068
PDE3A	2535.03	10	0.000351989
FLT1	179.227	16	0.000350263
CSK	712.434	10	0.000354862
TNNI3	4817.77	12	0.000346141
EPAS1	156.178	10	0.000355619
HDAC7	112.84	8	0.000357143
GLI2	782.435	10	0.000353857
TGFBR1	1600.22	10	0.000352485
RORA	3459.88	12	0.000347102
CCND2	163.293	18	0.0003465
PRKCI	63.5362	14	0.00035014
MKNK1	2031.66	12	0.000347826
CCND3	139.325	18	0.000345185
ADCY1	1335.24	6	0.000354108
CASP7	382.67	16	0.000346021
CCNB2	237.161	30	0.000332447
HDAC9	33.7563	10	0.000350385
KCNH2	274.266	8	0.000351247
ADRB2	4304.09	8	0.000343407
TKT	1877.13	12	0.000343525
RPS6KA5	49.9617	12	0.0003465
ITGAL	89.433	26	0.000333222
PIP4K2C	78.1453	16	0.000342349
EGLN1	125.468	10	0.000347705
HPGDS	1249.56	24	0.000332779
DAPK1	152.364	10	0.000347343
PPP2R5A	618.572	8	0.000347343
ADK	2442.04	32	0.000321958
GRM5	4604.4	14	0.000334672
IRAK4	160.753	14	0.00034188
ADORA2A	8083.87	14	0.000328515
DRD2	5101.71	14	0.000333111
CDK6	48.5843	24	0.000331345
WDR5	168.338	14	0.000340136
MYLK	269.953	6	0.000347222
TOP2A	1655.59	28	0.000324359
ALOX5	3324.48	20	0.000328947
ERN1	376.092	10	0.000342936
DNMT3B	332.73	16	0.000337041
XDH	4152.52	12	0.000334336
NOX1	1546	4	0.000345901
PDE4D	616.127	6	0.000345543
PDE4A	616.127	6	0.000345543
PTGS1	354.514	20	0.000332226
KLK2	3131.08	6	0.000339905
EIF2AK3	279.329	12	0.000338181
CTSS	1116.68	14	0.000334672
KCNJ3	1006.85	8	0.000340136
KCNJ5	1006.85	8	0.000340136
UGT2B7	3049.5	30	0.000316156
KCNE1	64.6824	8	0.000341413
KCNQ1	64.6824	8	0.000341413
CSNK1G2	545.118	6	0.000342466
NAMPT	153.734	12	0.000335909
FLT4	51.0261	10	0.00033761
GCG	15142.4	24	0.000299581
TYMS	7826.02	16	0.000318878
KISS1R	1546	10	0.000334225
CASP1	122.992	14	0.000332779
CASP6	112.087	8	0.000337496
ALOX15	326.878	18	0.000327869
PRKD1	150.504	12	0.000333333
PSEN2	242.564	16	0.000329056
EPHA2	186.039	6	0.000337952
KCNMA1	28.8578	4	0.000339905
CYP1B1	1041.49	28	0.000315956
NR3C2	1767.02	8	0.000332668
PLK4	2277.53	12	0.000328084
TRPV4	1563.66	14	0.000327332
GRIN1	472.928	16	0.000327225
CTSL	379.207	12	0.000330688
KIF11	143.747	26	0.000317058
COMT	6086.57	22	0.000310463
EIF4E	823.571	12	0.000327332
PKN1	458.758	10	0.000329381
CDK5R1	123.127	8	0.000331565
GRM1	5465.25	12	0.000318674
CYP17A1	485.659	26	0.000313578
CDK7	1687.88	18	0.000318979
PAK4	133.905	10	0.000328084
FKBP1A	690.917	10	0.000327011
EPHX1	254.509	26	0.000312598
ADA	4190.21	14	0.000317058
PI4KB	21.0984	8	0.000328839
ATIC	6195.65	18	0.000309023
F2	7083.36	24	0.000301841
CYP11B2	2996.82	24	0.000308547
FABP4	1016.12	6	0.000327439
PARP2	130.972	8	0.000326264
RXRG	342.454	14	0.000320205
APH1A	61.9774	12	0.000322061
NCSTN	61.9774	12	0.000322061
PSENEN	61.9774	12	0.000322061
FGF1	56.9722	14	0.000319591
ADAM10	141.769	8	0.000324675
BACE1	197.624	8	0.000324149
WNT3A	17.4662	6	0.000347222
MGLL	10723.3	16	0.00029824
SELL	520.398	12	0.000318269
HSD17B2	232.229	24	0.000307125
GSR	815.789	12	0.000317058
INCENP	105.256	12	0.000317864
PTGES	844.058	8	0.000320205
HTR1A	6756.36	10	0.000307882
CNR1	4558.12	14	0.000307409
HK2	3353.6	18	0.00030525
SELP	1286.04	16	0.000310366
F11	2147.61	8	0.000316356
GCK	2167.09	12	0.000311915
REN	3145.56	14	0.000308166
ABCC1	0	2	1
ABCG2	0	2	1
AVPR1A	0	2	1
AVPR2	0	2	1
C3AR1	0	2	1
C5AR1	0	2	1
DAO	0	2	1
HAO1	0	2	1
FTO	0	2	1
MC4R	0	2	1
GLRA1	0	2	1
SLC6A5	0	2	1
GRIK1	0	2	1
GRIK2	0	2	1
GRK1	0	2	1
GRK7	0	2	1
HCRTR1	0	2	1
HCRTR2	0	2	1
HEXA	0	2	1
HEXB	0	2	1
KCNK3	0	2	1
KCNK9	0	2	1
PIM1	0	2	1
PIM2	0	2	1
SAE1	0	2	1
UBA2	0	2	1
IDE	3702.83	6	0.000314367
SCARB1	1388.77	8	0.000316256
SMARCA2	98.3389	8	0.000318269
TRPA1	524.439	8	0.000317259
NR1H4	3090	8	0.000312695
ACHE	1587.21	4	0.000318471
RARA	207.004	12	0.000313185
MAOB	3190.15	22	0.000298864
SRD5A1	642.313	22	0.00030248
SRD5A2	642.313	22	0.00030248
PABPC1	542.809	6	0.00031746
HK1	2059.42	16	0.000305157
SGK1	268.981	8	0.000315457
PPARD	1546	8	0.000313087
TTR	1546	6	0.000314564
CYP11B1	246.266	22	0.00030175
CBR1	3054.7	22	0.000296912
ME1	5293.19	6	0.000307882
GRK2	2998.51	12	0.000305904
PGF	93.3231	12	0.000310463
CPT1A	7877.21	8	0.000300752
ANPEP	110.168	6	0.000315358
AMPD1	646.255	18	0.00030303
AMPD2	646.255	18	0.00030303
AMPD3	646.255	18	0.00030303
HSD17B3	51.4865	20	0.000301841
FEN1	149.054	10	0.000310945
NR1D1	19.94	8	0.000312695
NR1H3	82.5262	8	0.0003125
ADAM17	126.259	4	0.000315956
DHCR7	6231.21	18	0.000292141
MAOA	2949.01	22	0.0002936
CD81	110.051	4	0.000314961
MPO	1419.73	10	0.000307125
DHFR	6770.92	18	0.000290698
NR1I2	968.358	4	0.000311236
NR1I3	968.358	4	0.000311236
G6PC	1546	10	0.000304414
CDK3	446.918	12	0.000303214
ACE	246.31	12	0.000303398
HSD17B1	25.9334	14	0.000301659
TRPM8	111.437	8	0.000307031
CYP2D6	483.926	20	0.000294811
F3	2061.44	18	0.000294031
FABP1	3111	8	0.000300571
BACE2	136.886	4	0.000309023
UQCRB	1546	4	0.00030581
BRD9	19.7718	8	0.000304507
FPR2	1546	4	0.000305437
CCNT1	1434.44	8	0.000301841
ARG1	1742.04	8	0.000300933
KDM4C	15.5257	4	0.000333333
GSTM2	79.9693	18	0.0002936
GSTM1	79.9693	18	0.0002936
CDC7	31.361	10	0.000300933
CYP51A1	1932.2	14	0.000293772
AKR1B1	3598.41	16	0.000289101
PYGM	1190.65	10	0.000298151
PYGL	1190.65	10	0.000298151
CDK9	23.2584	8	0.000301841
LIMK2	21.2	8	0.000301477
GSTA1	79.9693	16	0.000293513
AGTR1	760.477	14	0.000294204
CYP26A1	1546	14	0.000292398
TYMP	921.028	10	0.000297089
CHRNA4	772	6	0.000301023
CHRNB2	772	6	0.000301023
AKR1C1	453.985	26	0.000282965
PTPN22	1547.72	8	0.000297265
ATP1A1	14.9277	6	0.000347584
SIGMAR1	1725.21	6	0.00029824
SLC6A4	3469.25	16	0.000285878
SIRT3	18.4964	8	0.000298954
CDA	1287.09	12	0.000292826
HMGCR	2083.62	12	0.000290444
RORC	166.871	6	0.000298864
CXCR2	901.041	10	0.000293858
GBA	140.198	6	0.000298151
CACNA1B	3090	6	0.000292569
GABBR1	3219.86	12	0.000286697
MME	158.138	8	0.000295421
DRD4	1706.69	8	0.000291715
CCNE2	13.5535	14	0.000310463
LSS	1442.85	10	0.000289017
GRM2	1433.15	6	0.000292654
CCR2	872.958	12	0.000287853
PPP5C	13.982	8	0.000354736
HSD11B1	865.345	16	0.000282725
SHH	946.696	8	0.000289855
SCN2A	1546	4	0.000292398
KCNJ1	15.9098	4	0.000294291
CHRM1	814.905	12	0.00028547
ASAH1	95.3702	6	0.000291715
CCR1	838.419	10	0.000286697
CXCR3	838.419	10	0.000286697
ESRRG	1546	4	0.000290951
PRCP	86.2377	8	0.000289184
CES1	1210.13	10	0.00028547
AKR1B10	1746.62	14	0.000280584
ODC1	1984.41	8	0.000285714
EPHX2	277.062	4	0.000292056
DRD1	1076.87	4	0.000289855
IDO1	1669.5	12	0.000281373
PDE2A	180.899	8	0.000287439
MMP1	18.9369	6	0.000289184
TNKS2	1546	4	0.000288184
EIF4A1	1554.26	8	0.000283286
CHRM3	168.237	8	0.000284252
CHRM5	168.237	8	0.000284252
ACVR1	619.688	6	0.000284657
MMP3	1546	6	0.000282247
ADRB1	519.746	4	0.00028547
PTPRF	12.9368	8	0.000352361
HSD11B2	177.384	8	0.00028082
SERPINE1	192.145	10	0.000278474
GLP1R	40.112	6	0.000280505
MTNR1B	1546	4	0.000278474
FBP1	405.325	10	0.000274424
CES2	185.867	8	0.000273973
HTR2A	2019.71	10	0.000268889
SHBG	1546	4	0.000274499
AKR1C2	33.1808	12	0.000267451
MMP13	1546	4	0.000271887
GRK6	448.243	4	0.000273598
EDNRA	822.51	8	0.000268601
EDNRB	822.51	8	0.000268601
ACACB	5791.4	12	0.00025582
TLR9	11.4261	8	0.000309119
F9	133.046	10	0.00026469
MGAM	411.92	12	0.000261712
CHRM2	88.5523	6	0.000267738
GART	2285.21	6	0.000263644
ALDH2	2259.44	14	0.000255951
AOC3	153.316	10	0.000263089
AKR1A1	551.373	8	0.000264131
BDKRB1	50.5101	4	0.000268384
FPGS	674.983	6	0.00026462
ATP12A	772	6	0.000264131
ATP4A	772	6	0.000264131
OPRD1	512.041	4	0.000266312
AKR1C4	1192.26	10	0.000259336
RORB	11.2003	6	0.000287604
GUSB	224.555	8	0.000262261
NPC1L1	257.743	4	0.000264901
SQLE	444.161	12	0.000256082
GRM4	94.6751	4	0.000262192
OPRM1	1726.18	8	0.000254388
CPA1	2	4	0.5
IGFBP1	2	4	0.5
MDH2	3825.04	6	0.000251004
CALCRL	1546	4	0.00025582
CCNC	112.241	6	0.000256279
FDFT1	4627.45	12	0.00024266
F2R	184.252	6	0.000254712
GAA	101.898	8	0.000249252
POLB	9.6141	8	0.0003003
LIPC	4626	6	0.000242777
CYP27A1	850.254	4	0.00025025
GALR1	1546	4	0.000248818
CPT1B	32.1958	6	0.000246731
PTGER2	3088	4	0.000243487
AMY2A	99.4474	8	0.000244081
BMP4	24.176	4	0.000247402
HTR6	1546	4	0.000243368
CXCR1	34.5388	10	0.000239866
GGH	1546	6	0.00023753
ADRA1A	0	4	0.5
ADRA1B	0	4	0.5
ADRA1D	0	4	0.5
HTR2C	194.96	6	0.000237586
IKBKE	7.48968	8	0.000344234
FLT3	6.7633	12	0.000356761
ACLY	696.839	10	0.000221239
GABRB3	2	8	0.25
GABRG2	2	8	0.25
ACACA	772	8	0.000214961
FASN	772	8	0.000214961
HNF4A	6.2023	8	0.000363636
IDH1	1546	6	0.000213038
FNTA	3090	6	0.000204499
KDM4A	5.59534	4	0.000316656
CTRC	0	2	0.333333
CTRB1	0	2	0.333333
IGFBP4	0	2	0.333333
IGFBP6	0	2	0.333333
CETP	3088	4	0.000204583
PTGER4	1546	4	0.000205002
MELK	3.79201	18	0.000311429
MDM4	4.48303	10	0.000359195
TEK	4.54917	4	0.000291206
HSF1	4.12598	8	0.000356506
YES1	4.25147	6	0.000354862
PTPN2	2.9015	16	0.000355872
DUSP3	3.01402	14	0.000351989
RAC1	3.87595	4	0.000302389
GABRA1	0	6	0.2
GABRB2	0	6	0.2
MAPKAPK2	2.41742	10	0.000351989
FGR	2.50658	8	0.000332336
GABRA4	0	4	0.166667
MAPKAPK5	2.41742	8	0.000318878
CSNK2A1	2.15212	8	0.000374813
PON1	1546	4	0.00017671
KDM6B	2.12548	6	0.000320821
AXL	1.82362	8	0.000347222
WEE1	0.622222	16	0.000328623
CDK8	1.4	4	0.000245098
BRD2	1	6	0.000297265
DBH	0.5	10	0.000259875
RPS6KA1	0.666667	8	0.000343053
MPI	0.666667	8	0.000247219
CCNB3	0.2	12	0.000312305
ALOX12	0	14	0.000316957
ALOX15B	0	14	0.000316957
NEK2	0	14	0.000310559
TTK	0	14	0.000308071
PDE1B	0.545455	8	0.000287439
PDE1C	0.545455	8	0.000287439
TXK	0	12	0.000335233
CYP26B1	0	12	0.000292312
IMPDH2	0	12	0.000273448
IMPDH1	0	12	0.000273448
PDE10A	0.545455	6	0.000287356
RPS6KA4	0.206897	8	0.000316356
SELE	0	10	0.000303674
APH1B	0	10	0.000298151
STS	0	10	0.000285633
HSPA1A	0	8	0.000345901
DAPK2	0	8	0.000343997
DAPK3	0	8	0.000343997
CTSD	0	8	0.000330469
HDAC5	0	8	0.00031407
RARG	0	8	0.000293255
RARB	0	8	0.000293255
AGTR2	0	8	0.000286533
PNMT	0	8	0.000259808
F10	0	8	0.000251953
F7	0	8	0.000251953
CCR3	0	8	0.000235627
EHMT1	0	6	0.000361011
MKNK2	0	6	0.000343407
RPS6KA3	0	6	0.000342936
RPS6KA2	0	6	0.000342936
PGK1	0	6	0.000332557
CTSK	0	6	0.000324781
MBD2	0	6	0.000324359
PIK3C2G	0	6	0.000321958
ERCC5	0	6	0.000315557
FGFR4	0	6	0.000309406
PBRM1	0	6	0.000301114
GDA	0	6	0.000293686
P2RX3	0	6	0.000293341
P2RX7	0	6	0.000293341
NR1H2	0	6	0.000293169
DBF4	0	6	0.000289352
CTSG	0	6	0.000288018
ELANE	0	6	0.000288018
TAOK1	0	6	0.000280741
TAOK2	0	6	0.000280741
TAOK3	0	6	0.000280741
LGMN	0	6	0.000275406
PLAT	0	6	0.000274348
TK1	0	6	0.000266312
QDPR	0	6	0.000247709
PFKFB3	0	6	0.000247158
XPO1	0	4	0.000359454
SETD7	0	4	0.000357654
BCL2A1	0	4	0.000343053
WNT3	0	4	0.000340368
CA9	0	4	0.000330688
CTSH	0	4	0.00032457
CTSV	0	4	0.00032457
KDM5B	0	4	0.000322997
BAZ2A	0	4	0.000322685
KDM5C	0	4	0.000322581
PARP3	0	4	0.000321958
PLA2G2A	0	4	0.000320513
EPHA1	0	4	0.000308547
EPHA4	0	4	0.000306843
EPHA3	0	4	0.000306843
EPHA7	0	4	0.000306843
EPHB2	0	4	0.000306843
SF3B3	0	4	0.00030349
PGD	0	4	0.00029976
BRD3	0	4	0.000297177
AHCY	0	4	0.00029577
SORT1	0	4	0.000289436
S1PR3	0	4	0.000288018
MIF	0	4	0.000287439
MAP3K20	0	4	0.000287439
KLK1	0	4	0.000281928
PDE4B	0	4	0.000280584
PDE7A	0	4	0.000280584
CAPNS1	0	4	0.000280584
SLC5A2	0	4	0.000274952
PREP	0	4	0.000274952
TNNC1	0	4	0.000273149
TNNT2	0	4	0.000273149
PLAU	0	4	0.000272257
ADORA1	0	4	0.00026462
ADORA3	0	4	0.00026462
LTA4H	0	4	0.000262329
ALOX5AP	0	4	0.000262329
PDE5A	0	4	0.000259673
HTR1B	0	4	0.000259202
FAAH	0	4	0.000255297
OAT	0	4	0.00025355
CHRNA7	0	4	0.00024426
CPT2	0	4	0.000244081
LIPG	0	4	0.000242601
SOAT2	0	4	0.000238379
SOAT1	0	4	0.000238379
HTR2B	0	4	0.000222668
ECE1	0	4	0.000222469
ATP4B	0	4	0.000219394
SCD	0	4	0.000184366
HIPK4	0	2	0.000357015
KMT5A	0	2	0.000357015
KDM4B	0	2	0.000344947
BMX	0	2	0.000340716
NR5A1	0	2	0.000336927
SLC5A1	0	2	0.000333111
KDM5A	0	2	0.000322477
CSF1R	0	2	0.000320924
TUBB1	0	2	0.000312989
TUBB3	0	2	0.000312989
MARK1	0	2	0.000312989
PLA2G10	0	2	0.000308356
EPHA8	0	2	0.000306748
EPHB3	0	2	0.000306748
EPHB4	0	2	0.000306748
EPHA6	0	2	0.000306748
EPHB1	0	2	0.000306748
EPHA5	0	2	0.000306748
PITRM1	0	2	0.00030525
NAE1	0	2	0.00030525
TYR	0	2	0.000304229
CMA1	0	2	0.00030349
CDC42BPA	0	2	0.000303122
IGFBP5	0	2	0.000297177
PLEC	0	2	0.000297
POLA1	0	2	0.000297
MARK3	0	2	0.000294551
CA2	0	2	0.000293427
PHKG2	0	2	0.000292227
OGA	0	2	0.000292056
HDAC10	0	2	0.000290782
PPM1B	0	2	0.000289268
ASF1A	0	2	0.000288184
ACKR3	0	2	0.000286205
MERTK	0	2	0.000283126
PLAA	0	2	0.000282566
S1PR1	0	2	0.000281928
S1PR2	0	2	0.000281928
MMP14	0	2	0.000281215
MMP7	0	2	0.000281215
BCHE	0	2	0.000274348
ATP2A1	0	2	0.000273673
TNNI3K	0	2	0.000273075
NOX4	0	2	0.000272926
GNRHR	0	2	0.000265604
CHRM4	0	2	0.00026455
P2RY12	0	2	0.000263922
ADORA2B	0	2	0.000261986
PRKCH	0	2	0.000261233
PDE6D	0	2	0.000259538
PDE9A	0	2	0.000259538
DUT	0	2	0.00025582
RBP4	0	2	0.000253036
FABP5	0	2	0.00025208
GPBAR1	0	2	0.000251826
SLC10A2	0	2	0.000251826
CNR2	0	2	0.000248385
MT-ND4	0	2	0.000247341
FPR1	0	2	0.000247097
SLC37A4	0	2	0.000246427
F13A1	0	2	0.000244738
FABP2	0	2	0.000243902
FABP3	0	2	0.000243902
DRD5	0	2	0.00024325
FFAR1	0	2	0.00024325
GCGR	0	2	0.00024325
GIPR	0	2	0.00024325
HLA-DRB1	0	2	0.000241721
CACNA2D1	0	2	0.000238607
CACNA2D2	0	2	0.000238607
DGAT1	0	2	0.000238493
SCN9A	0	2	0.000238493
DRD3	0	2	0.000238039
ESRRA	0	2	0.00023753
LNPEP	0	2	0.000235682
CASR	0	2	0.000234687
KCNJ11	0	2	0.000234687
SRM	0	2	0.000234028
PDCD4	0	2	0.000232396
MMP10	0	2	0.000231696
TDO2	0	2	0.000231107
MTNR1A	0	2	0.000229148
SERPINA6	0	2	0.000226449
ADAMTS4	0	2	0.000224669
ABAT	0	2	0.000213675
CALCA	0	2	0.000213584
GALR2	0	2	0.000208681
HTR7	0	2	0.000204834
SLC19A1	0	2	0.000200682
MGMT	0	2	0.000182916
PTGER1	0	2	0.00017696
FNTB	0	2	0.000176585
PGGT1B	0	2	0.000176585
PLA2G7	0	2	0.000155473

## Sheet: Table 5
Supplementary Table 5: PQT-PPI
target name	Betweenness_unDir	Degree_unDir	Closeness_unDir
TP53	113000	184	0.000433088
PRKACA	99191.4	138	0.000413565
SRC	41174.6	138	0.000405515
AKT1	28883.5	128	0.000419815
MAPK1	29221.7	128	0.00041806
HSP90AA1	34549.4	110	0.000417014
MAPK3	25118.3	124	0.000414422
ESR1	34904.2	90	0.000419639
STAT3	25407.6	104	0.0004095
PIK3CA	15953.6	120	0.000395726
EP300	28356	84	0.000403714
JUN	20340.7	80	0.000413394
PIK3R1	14877.2	124	0.000381243
EGFR	16497.6	88	0.000398883
HSP90AB1	13901.5	86	0.000398089
PTK2	14243.7	86	0.000391543
GRB2	18762.5	100	0.000367242
MAPK8	11257.5	80	0.000390168
HRAS	11253	82	0.000387297
PIK3CB	7265.52	112	0.000368324
AKT2	6623.2	84	0.000388954
AKT3	6623.2	84	0.000388954
PIK3CD	6978.51	110	0.000368189
RELA	12468.6	66	0.00039557
HDAC1	15263.4	80	0.000376648
BCL2	13561.4	70	0.000382409
PRKCA	16298.6	76	0.000373972
HIF1A	16938.7	58	0.000386997
FOXO1	11681.8	62	0.000389712
GSK3B	17672.5	60	0.000380807
ITGB1	19854.7	66	0.000370233
CREBBP	8762.48	56	0.000387747
APP	30128.9	48	0.000364964
MAPK14	6636.34	72	0.000374251
FOS	2477.35	52	0.000394945
MAPK9	4304.26	72	0.000376506
CASP3	12537.8	60	0.000375516
AR	10633.6	42	0.000390168
RAF1	5122.35	60	0.000379075
MAPK13	4471.69	68	0.000373413
MAPK11	4471.69	68	0.000373413
TNF	10083.1	58	0.000371471
CDK1	14272.4	70	0.000353232
NCOR1	15396.8	64	0.000355999
PTGS2	31089.1	38	0.000355619
JAK2	16314	68	0.000350263
STAT1	4222.92	48	0.000377929
PTPN11	3477.2	74	0.000358166
CCND1	4826.43	48	0.000375516
PRKCB	9552.54	60	0.000359066
MAPT	12221.1	40	0.000370645
GAPDH	26342.5	26	0.000363504
IKBKB	4234.91	54	0.000369276
ESR2	8896.7	38	0.000373552
MTOR	7720.3	48	0.000366703
ABL1	20542.5	44	0.000352485
SIRT1	11057.5	44	0.000364299
IGF1R	4379.58	46	0.000370096
FYN	10449.5	58	0.000352361
IL6	7917.67	48	0.000362582
ERBB2	1528.48	44	0.000373692
EZH2	7520.49	50	0.000359712
MDM2	1976.97	44	0.000371333
HDAC2	6112.25	52	0.000359583
CHUK	3742.61	56	0.000358809
PRKCG	5668.54	52	0.000357782
BCL2L1	4870.48	46	0.00036036
CAMK2B	16086.9	38	0.000352113
PGR	2288.2	36	0.000370782
LYN	4870.34	54	0.000353482
CDK2	8633.87	58	0.000344234
TLR4	6976.01	46	0.000353857
CDC42	5285.23	52	0.000351
RHOA	5248.74	40	0.000360101
PPARG	8817.64	38	0.000356888
NR3C1	5498.9	32	0.000364564
MAP3K7	6127.31	56	0.00034459
CCNA2	6526.1	60	0.000339905
BRAF	1471.03	34	0.000365631
CALM1	15074.3	42	0.000342114
PRKCD	3003.21	42	0.000356888
CDC25C	10511.1	42	0.000345423
VAV1	4244.65	46	0.000348918
NOS1	8606.6	36	0.000350754
MAP2K1	1708.45	44	0.000352983
PTPN6	1117.06	48	0.000350385
PRKCZ	900.458	32	0.000363108
KDR	3393.79	46	0.000347826
CYP19A1	22928.4	34	0.000332447
CXCL8	13496.6	36	0.000341647
NFKBIA	1320.59	26	0.000363108
RXRA	14620.3	44	0.000331565
RPS6KB1	1000.26	30	0.000357398
PLK1	3949.26	40	0.000345781
PPP2CA	5375.68	34	0.000347826
KDM1A	3292.4	40	0.000343879
NR4A1	2115.14	20	0.00036062
JAK1	687.269	50	0.000338868
MAP2K2	652.014	36	0.000348797
NCOR2	6468.9	48	0.000331785
TRPV1	16148.1	16	0.000344471
CCNB1	3007.19	50	0.000333778
PSEN1	6934.98	28	0.000345901
ITGB2	2911.58	52	0.000331565
YWHAG	7028.77	28	0.000345066
HSPA5	7453.83	26	0.000345304
SMARCA4	4024.21	36	0.000341413
PRKAA2	10558.7	28	0.000338639
BAD	718.22	26	0.000352113
IL1B	2478.3	34	0.000342936
CACNA1C	6875.44	32	0.000337952
BRD4	8865.99	24	0.000341647
JAK3	2450.24	40	0.000337154
MAP3K5	1696.4	32	0.000343997
PPARA	10367.2	20	0.000342349
CDK5	2160.14	20	0.000352485
KAT2B	6030.94	24	0.000343761
PDGFRB	766.309	34	0.000342114
CASP9	1560.86	32	0.000342466
MAP2K4	1107.17	36	0.000339674
EZR	1408.39	20	0.000351247
SYK	359.326	38	0.000338295
CYP1A2	14596.1	52	0.00030931
PDGFRA	119.814	32	0.000342936
CXCR4	17103	30	0.000322893
ITGA2	1434.9	34	0.000338868
GRIN2A	5642.68	26	0.000339674
PRKCE	3930.82	36	0.000334001
CASP8	1205.38	34	0.000338983
ATM	1486.41	32	0.000338868
PRKCQ	1132.13	30	0.000340716
PDPK1	1494.67	34	0.000336927
AURKB	6888.86	32	0.000331455
SLC9A1	2611.54	24	0.00034188
GSTP1	11048.6	20	0.000334225
CYP3A4	11861	70	0.000293945
MET	107.329	28	0.000341297
KIT	2902.05	24	0.000340832
MAP2K7	6344.95	34	0.000328623
PIK3CG	507.411	34	0.000335909
SPHK2	6399.68	28	0.000333
PARP1	4617.86	30	0.000333444
NOS3	3161.46	24	0.000339905
FGFR1	4301.55	22	0.000338409
LCK	2010.24	30	0.000335008
PRNP	4549.83	22	0.000337496
CDK4	1095.47	32	0.000334001
CYP1A1	9718.53	62	0.00029967
PKM	4227.19	16	0.000342466
DNMT1	2164.16	28	0.000335345
CHEK1	1620.73	34	0.000330907
CFTR	2507.43	18	0.000340716
SREBF2	15752.8	14	0.000327118
FGF2	2859.17	32	0.000328947
G6PD	6090.24	16	0.000337268
XIAP	427.955	28	0.000335008
CHEK2	2758.71	30	0.000329707
CACNA1S	4059.62	24	0.000332226
ERBB4	42.344	20	0.000339905
SLC6A3	12272.3	22	0.000322789
KNG1	20696.2	44	0.000294898
PTK2B	506.551	28	0.000332668
ILK	258.341	22	0.00033761
HSP90B1	325.16	20	0.000338868
GRIN2B	1101.62	18	0.000339213
MAP2K3	4070.11	36	0.00032113
MAP2K6	3823.4	36	0.000320924
ICAM1	2097	30	0.000327118
THRB	2114.05	20	0.000334784
TBK1	254.279	20	0.000335909
SPHK1	5700.91	26	0.000324359
IGFBP3	2315.26	10	0.000340716
HDAC4	1160.32	22	0.000332557
FKBP5	224.182	18	0.000336814
ITGB3	757.138	34	0.000323311
GRIA1	3286.65	20	0.000329924
AHR	4060.64	8	0.000337952
GYS1	10797.9	18	0.000321543
CSNK1E	2109.97	18	0.000332116
MMP9	7891.77	26	0.000318471
HDAC6	472.581	14	0.000336814
PTPN1	421.657	24	0.000328947
ROCK1	893.801	20	0.000331126
ITK	629.826	30	0.000323415
DPP4	15179.8	24	0.000309789
ACE2	10717.5	24	0.000315159
PRKDC	672.805	16	0.000334001
IL6ST	90.7513	26	0.000326904
SNCA	6664.99	20	0.000323311
TERT	91.3648	10	0.000338639
ITGA4	178.219	30	0.000322789
ZAP70	1710.55	32	0.000319183
MAP3K1	388.075	26	0.000324359
INSR	686.356	24	0.000325521
CSNK2A1	346.861	12	0.000335121
PRMT1	1757.9	10	0.000334784
CCNA1	655.687	22	0.000326691
PRKAG1	4200.33	26	0.000318979
PRKAB1	4200.33	26	0.000318979
AURKA	888.184	24	0.000324254
CDC25B	991.305	30	0.000319387
BTK	1086.46	28	0.000320821
ALK	4787.84	20	0.000322373
NOS2	2105.78	16	0.000328623
ELAVL1	1837.53	16	0.000328731
BIRC2	786.629	22	0.000325309
LGALS3	2450.93	14	0.000329164
ITGA5	112.482	28	0.000320821
ITGB7	134.739	26	0.000321854
USP7	156.025	16	0.000329598
ITGB5	247.299	26	0.000320616
SMO	2088.48	22	0.000321234
ROCK2	595.715	18	0.000326052
CDC25A	437.143	42	0.000307503
ITGAV	97.4053	26	0.00032041
HDAC3	754.326	28	0.000317965
CSNK1D	1466.94	16	0.000326158
APEX1	2719.71	12	0.000327654
CYP2C9	5055.06	42	0.000301296
PTPRC	5681.35	26	0.000312989
PDE3B	8312.69	12	0.00032041
PLG	18945.3	22	0.000299043
SIRT2	1070.93	14	0.000327332
GSK3A	542.213	14	0.000327869
NLRP3	268.735	14	0.000328084
GRIA2	377.495	14	0.000327654
VCAM1	1352.05	26	0.000317058
LRRK2	2049.73	14	0.000325309
RIPK2	1475.8	22	0.000319591
HCK	222.353	16	0.000325733
KEAP1	1224.92	14	0.000325945
CCNE1	461.937	20	0.000322061
KCNJ6	6882.23	14	0.000318471
PPP1CA	2819.17	24	0.000315756
RAD51	697.53	18	0.000322685
CSNK2A2	162.396	8	0.000330907
BIRC3	552.871	20	0.000320616
MALT1	99.1682	22	0.000319591
CSNK1A1	86.4605	10	0.000328839
MCL1	3464	8	0.000325415
PNP	10076.3	24	0.000304507
FGFR3	262.134	16	0.000322685
ITGA2B	331.694	16	0.000322373
MAP3K8	206.483	20	0.000319285
SCN5A	3772.43	14	0.000319285
ADRB2	6658.34	14	0.000315557
MMP2	4594.96	14	0.000317965
NTRK2	3392.68	16	0.000317763
KDM3A	928.047	10	0.00032457
PLK3	60.0847	6	0.000328623
EHMT2	277.487	16	0.000320513
CYP2C19	12195.9	30	0.000294031
VCP	1777.01	12	0.000320924
LIPE	6348.71	12	0.000314762
FLT1	288.149	18	0.00031736
PTK6	159.642	10	0.000323729
IL2	1984.06	18	0.000315159
PLA2G4A	3036.59	12	0.000318167
CASP7	739.026	22	0.000313185
HNF4A	496.602	10	0.000322165
CYP2A6	4892.34	46	0.000288434
THRA	1245.01	16	0.000315358
ATR	342.673	14	0.000317662
TH	9078.8	20	0.000301841
NTRK1	1422.94	20	0.000311429
CAMK4	925.366	14	0.000316556
CD38	2608.95	16	0.000312793
GLI1	1020.98	10	0.000319081
MKNK1	6917.01	10	0.000310849
ITGAL	272.65	34	0.00030003
TOP1	1019.81	8	0.000319285
GLI2	579.582	10	0.000317763
RBBP4	3882.59	30	0.000297708
PDE3A	3984.47	8	0.000314663
CCNB2	483.024	34	0.000297974
AKR1C3	4003.44	46	0.00028401
ADCY1	1773.17	6	0.000317864
RORA	4234.91	14	0.000307977
CSK	736.731	10	0.000314861
CAPN1	984.297	8	0.000315856
CAPN2	984.297	8	0.000315856
CTSB	738.532	16	0.000309406
HPRT1	10522.5	32	0.000284576
DAPK1	203.676	10	0.000314564
PER2	1742.61	18	0.000305904
TNNI3	3504.87	8	0.000311429
LDHA	436.321	12	0.00031211
HPGDS	3431.65	28	0.000295508
KCNH2	523.58	8	0.000314663
PRKCI	78.909	14	0.000310366
ERN1	553.607	12	0.000310752
NQO1	619.161	6	0.000315259
KCNJ3	3530.98	10	0.000308452
KCNJ5	3530.98	10	0.000308452
MAPKAPK2	22.2051	10	0.000312598
IRAK4	225.629	14	0.000309215
EPAS1	166.901	10	0.00031211
MYLK	223.303	6	0.000315159
GRM5	5401.45	16	0.000300481
RPS6KA5	50.6865	12	0.00031027
ABCC8	4016.16	6	0.000309885
CCND3	175.612	16	0.000306654
ADK	10629	32	0.000280978
HDAC7	73.0214	8	0.000312793
CCND2	139.542	16	0.000305904
RBBP7	416.587	26	0.00029753
TOP2A	4111.56	34	0.000286533
FLT4	101.823	12	0.000308642
EPHA2	339.755	8	0.000311042
EGLN1	191.15	10	0.000309598
KISS1R	8638	12	0.000296384
EIF2AK3	378.56	14	0.000304971
KCNE1	74.3133	8	0.000309502
KCNQ1	74.3133	8	0.000309502
CSNK1G2	387.561	8	0.000308642
CSNK1G3	387.561	8	0.000308642
XDH	5570.13	12	0.000298597
HDAC9	20.8752	10	0.000306843
CASP1	631.908	18	0.000299401
PDE4D	1436.55	4	0.000309119
PDE4A	1436.55	4	0.000309119
KLK2	5409.73	8	0.000300842
PIP4K2C	148.372	14	0.000302755
PRKD3	161.334	14	0.000302663
PRKD1	161.334	14	0.000302663
ADCY10	1034.91	4	0.000308737
TKT	5462.39	12	0.000296912
SUZ12	225.875	22	0.000295508
NR5A1	690.499	4	0.000308928
TRPV4	2798.05	16	0.000296472
TGFBR1	84.2566	4	0.000308071
MYLK2	24.2042	4	0.000307977
CDK6	35.586	22	0.000293772
CASP6	159.931	10	0.00030248
SGK1	431.345	10	0.000301477
CYP1B1	2012.07	30	0.000283366
PSEN2	262.425	16	0.000296472
DRD2	3837.13	12	0.000294985
CDC45	2109.89	28	0.000283688
GRIN1	765.428	18	0.000292826
ALOX5	3662.24	18	0.000289101
HMGCR	6448.25	18	0.000285551
PLD1	35.2002	10	0.00029985
PLD2	35.2002	10	0.00029985
PTGS1	365.805	20	0.000291121
CTSS	845.622	12	0.000296736
XBP1	113.493	8	0.000300752
CACNA1H	333.324	10	0.000298686
UGT2B7	2988.05	30	0.000279174
EED	29.4317	20	0.000290192
SCARB1	1300.52	10	0.000296209
HSD3B1	740.632	34	0.000278164
HSD3B2	740.632	34	0.000278164
NR0B2	1745.26	14	0.000292398
RXRB	625.567	20	0.000288351
PAK4	78.5258	10	0.000296736
FKBP1A	100.383	8	0.000297885
KIF11	209.806	30	0.000280191
PKN1	227.268	10	0.00029577
ALOX15	440.853	16	0.000290613
SELL	1121.77	14	0.000290867
PLK4	3525.27	12	0.000289017
CDK5R1	142.251	8	0.000295858
DHCR7	8422.29	24	0.000272628
PAK3	312.369	10	0.0002936
F11	4206.63	10	0.000288684
ADORA2A	4511.84	12	0.000286615
CYP17A1	418.683	30	0.000277701
DNMT3A	202.402	14	0.000290444
COMT	6220.82	22	0.000276396
CAMK2G	86.7561	10	0.000292826
TRPC3	1174.54	10	0.000291121
EPHX1	326.788	26	0.000279486
CYP11B2	3617.24	28	0.000273673
WNT3A	5194	8	0.000286779
GRK2	2063.79	18	0.000282566
APH1A	76.7965	12	0.000289519
NCSTN	76.7965	12	0.000289519
PSENEN	76.7965	12	0.000289519
ADAM10	150.793	8	0.000292483
HSD17B2	500.119	30	0.000274048
ACHE	3414.68	6	0.000289017
CCNH	2926.09	20	0.000278552
CDK7	1470.85	18	0.000281928
NR3C2	1706.37	6	0.000290782
PARP2	303.305	10	0.000288767
BACE1	205.83	8	0.000290444
NAMPT	219.348	10	0.0002886
GRM1	5884.71	14	0.000278164
HSD17B7	5091.88	22	0.000271887
ATIC	5125.87	18	0.000274952
CASP2	19.7956	4	0.000291715
F2	9076.73	26	0.00026295
INCENP	274.114	12	0.00028393
TRPA1	838.115	8	0.000285551
ABCC1	0	2	1
ABCG2	0	2	1
AVPR1A	0	2	1
AVPR2	0	2	1
C3AR1	0	2	1
C5AR1	0	2	1
CLK1	0	2	1
CLK4	0	2	1
FFAR1	0	2	1
FFAR4	0	2	1
FTO	0	2	1
MC4R	0	2	1
GLRA1	0	2	1
SLC6A5	0	2	1
GRIK1	0	2	1
GRIK2	0	2	1
HCRTR1	0	2	1
HCRTR2	0	2	1
HTR3A	0	2	1
HTR3B	0	2	1
HTR6	0	2	1
HTR7	0	2	1
KCNK3	0	2	1
KCNK9	0	2	1
MAN1B1	0	2	1
MAN2A1	0	2	1
METAP1	0	2	1
METAP2	0	2	1
MT-ND4	0	2	1
UQCRB	0	2	1
MTNR1A	0	2	1
MTNR1B	0	2	1
PIM1	0	2	1
PIM2	0	2	1
PRSS1	0	2	1
PRSS3	0	2	1
SAE1	0	2	1
UBA2	0	2	1
SERPINA6	0	2	1
SHBG	0	2	1
SLC22A2	0	2	1
SLC47A1	0	2	1
SLC27A1	0	2	1
SLC27A4	0	2	1
ADA	4562.88	14	0.000275482
SELP	1548.33	16	0.000277239
GCK	1361.07	6	0.000285225
ANPEP	1822.89	8	0.000282965
CNR1	4216.45	16	0.000273598
FABP4	654.815	6	0.000285796
LIMK1	28.9904	10	0.000283286
TLR9	20.1728	8	0.000284738
PTGES2	527.287	10	0.000282486
PTGES	527.287	10	0.000282486
NR1H4	4166.35	12	0.000276319
RXRG	229.387	16	0.000277701
CYP51A1	1519.56	16	0.000275862
HDAC5	24.7277	10	0.00028169
CTSL	14.9814	10	0.000292912
TYR	1989.42	6	0.000282008
GSR	649.702	12	0.00027894
REN	3804.7	14	0.000273224
SRD5A1	622.472	26	0.000267809
SRD5A2	622.472	26	0.000267809
ERCC5	102.606	8	0.000282486
CYP11B1	213.066	26	0.000268025
TYK2	14.025	20	0.000318269
ACACB	3932.99	16	0.000270563
CCR2	1164.54	18	0.00027248
MAOB	3365.45	22	0.000266525
CCNE2	15.0102	14	0.000276472
CXCR2	920.881	14	0.00027533
RARA	249.044	14	0.000276091
ARG1	1734	8	0.000278552
HSD17B3	52.0225	24	0.000268097
ADAM17	139.029	4	0.000283527
PPP5C	14.8472	8	0.000320307
AKR1B1	4356.79	20	0.000265393
PPARD	1753.24	10	0.000276014
MPO	1941.5	12	0.000274048
DHFR	3777.73	16	0.000268528
NR1H3	151.421	12	0.000276167
CD81	60.4314	4	0.000282406
IDE	506.16	4	0.000281532
MGLL	6375.29	16	0.00026462
CBR1	2859.46	24	0.000262674
FEN1	281.724	10	0.000276549
HTR2A	1267.44	14	0.000272109
PGF	108.957	12	0.000274424
CCR5	43.1954	14	0.000272331
NR1I2	1733.11	6	0.000276243
HTR1A	2244.64	8	0.000273973
HSD17B1	64.1297	16	0.00027027
TTR	1734	4	0.000277393
FPR2	1734	4	0.000277393
CHRNB4	1726.4	14	0.000269397
CHRNA3	1726.4	14	0.000269397
MAOA	2846.56	22	0.000261712
CACNA1B	100.388	6	0.000277624
CCR1	53.0136	14	0.00027115
CXCR3	53.0136	14	0.00027115
TRPM8	1784.62	8	0.000273448
AKR1B10	3141.21	18	0.000263852
NR1D1	21.498	8	0.000275482
CAMKK2	120.429	8	0.000274952
SIGMAR1	1295.1	6	0.000274424
GRK3	868.669	14	0.000268312
CDK3	555.624	12	0.000270124
ACACA	4149.02	14	0.000263922
NR1I3	1110.91	4	0.000275406
CHRNB2	860.4	12	0.000269324
CHRNA4	860.4	12	0.000269324
GRK5	1129.4	6	0.000273523
SLC18A2	1734	8	0.00027115
GBA	1774.42	10	0.000269107
GPR55	2085.86	6	0.000271592
F3	2585.3	20	0.000259471
HTR2C	618.643	10	0.000269614
CCNT1	837.019	12	0.000267666
CDC7	29.6487	12	0.000268168
BACE2	99.1291	4	0.000274198
FABP1	3473.78	8	0.000266667
LSS	861.363	12	0.000266809
POLB	1746.44	12	0.000265675
FGF1	13.6026	10	0.000279955
SLC6A4	3491.21	18	0.000257865
CYP2D6	380.692	20	0.000260146
CPT1A	2091.29	6	0.000268673
CCR3	637.546	14	0.000264061
AGTR1	1169.42	16	0.000261712
CDK9	46.2201	10	0.000267594
SCN2A	3718.75	8	0.00026441
TDP1	1744.25	10	0.000265041
PTPN22	1735.67	8	0.000266525
GABBR2	8700.9	14	0.000252972
AKR1C1	471.065	30	0.000250752
CXCR1	16.7441	12	0.000265182
CHRNA6	1720	4	0.000268889
GSTM2	64.8914	18	0.000259403
GSTM1	64.8914	18	0.000259403
ASAH1	2001.04	10	0.00026295
SF3B3	3464	4	0.000265111
BRD9	15.5827	6	0.000267809
CACNA2D1	50.3075	8	0.000265745
GABBR1	2475.79	14	0.000257931
GPER1	13.2004	8	0.000326052
GSTA1	64.8914	16	0.000259336
NAT1	808.995	10	0.000260756
RORC	163.075	6	0.000264201
TYMP	1838.43	10	0.000258933
F12	567.259	8	0.000261575
MME	314.148	8	0.000261643
DRD4	1841.57	8	0.000259538
ACE	149.821	12	0.000258264
ASF1A	61.0527	6	0.000262674
GRM2	600.613	6	0.000261986
KDM4C	12.9955	4	0.000293169
IDO1	5316.91	12	0.000250815
HSD11B1	600.021	20	0.000249875
CHRM1	994.135	12	0.000253165
ELOVL6	1889.1	6	0.000256608
PRCP	291.727	8	0.000256082
AGL	1726	10	0.000251953
PYGM	1726	10	0.000251953
PYGL	1726	10	0.000251953
TYMS	3572.27	10	0.000249626
AMPD1	282.718	16	0.000249066
AMPD2	282.718	16	0.000249066
AMPD3	282.718	16	0.000249066
S1PR4	40.8239	4	0.000258532
FDFT1	5359.7	14	0.000242954
EPHX2	315.921	4	0.000256542
KDM4A	12.036	6	0.000287936
UPP1	163.753	6	0.000254582
TNKS2	1734	4	0.000253936
CHRM3	152.708	8	0.000251953
CHRM5	152.708	8	0.000251953
EIF4A1	5196	8	0.000245218
PNMT	313.748	8	0.000251004
HSD11B2	219.353	12	0.000247893
HCN4	1806.45	6	0.000250564
CES1	759.241	10	0.000248571
KCNJ11	1919.47	8	0.000248139
NPC1L1	207.491	4	0.000252717
IKBKE	11.3682	8	0.00030722
CPB2	5372.37	8	0.000242542
PREP	3466	8	0.000244499
MAP3K11	11.5174	4	0.000278009
GART	933.464	6	0.000248016
SQLE	331.079	12	0.000243784
RORB	11.2706	6	0.000254001
GRK6	198.381	4	0.000249563
SERPINE1	274.016	12	0.000242895
OPRM1	2194.08	12	0.000239406
FLT3	10.5358	12	0.000318269
RAC1	11.1829	4	0.000269179
TAC3	5196	8	0.000236128
BDKRB2	109.984	10	0.000240442
F9	328.96	10	0.000239751
EDNRA	956.83	8	0.000240211
EDNRB	956.83	8	0.000240211
AKR1C2	31.5064	12	0.000237417
MMP1	10.4872	6	0.00025582
PLAT	24.4691	8	0.000239866
FBP1	3464	6	0.000236351
BDKRB1	90.83	6	0.000240096
ALDH3A1	1122.08	12	0.000233372
STK3	10.4078	4	0.000287356
MMP13	1734	4	0.000237586
MELK	8.81512	20	0.000276243
CHRM2	120.626	6	0.000237473
AKR1A1	651.268	10	0.000233427
ALDH2	1188.63	14	0.000229516
OPRD1	507.68	4	0.000237192
CES2	37.5715	6	0.000236183
PON1	2	4	0.5
IGFBP1	2	4	0.5
PTGER4	2	4	0.5
ATP12A	866	6	0.000234467
ATP4A	866	6	0.000234467
AOC3	37.9738	10	0.000232342
P2RY12	1734	4	0.000234412
AKR1C4	386.015	10	0.000229305
FASN	236.923	10	0.000229253
PDE2A	31.1325	6	0.000232342
CHRNA1	4	6	0.333333
GUSB	153.209	8	0.000229253
SCD	1749.61	8	0.000226706
GRM4	41.5976	4	0.000231965
HTR1B	220.837	6	0.000229358
CACNA1G	8.74352	6	0.000294031
F2R	253.311	6	0.000225327
ACLY	1734	8	0.000220459
CYP27A1	116.048	4	0.000225378
CHRNA2	12.4	12	0.000218723
ADRA1A	0	4	0.5
ADRA1B	0	4	0.5
ADRA1D	0	4	0.5
DAO	0	4	0.5
HAO2	0	4	0.5
HAO1	0	4	0.5
PSMB1	0	4	0.5
PSMB2	0	4	0.5
PSMB5	0	4	0.5
SORD	1734	6	0.000215889
MDM4	7.15424	12	0.000317965
PRPF4	1734	4	0.000215657
GABRB3	3458	10	0.000207771
GABRA1	1728	8	0.000207727
MGAM	866	10	0.000206996
AMY2A	866	10	0.000206996
TRPC6	7.01189	4	0.0002405
TDO2	3464	4	0.000206186
CCNC	6.55397	6	0.00022686
FNTA	3466	6	0.000200844
PPM1A	6.00588	8	0.000265182
CPB1	3464	4	0.000200562
AXL	5.55941	8	0.000309885
CETP	0	2	0.333333
IGFBP4	0	2	0.333333
IGFBP6	0	2	0.333333
PLA2G7	0	2	0.333333
PTGER1	0	2	0.333333
PTGER2	0	2	0.333333
YES1	4.91744	6	0.000315358
CDK8	4.91065	6	0.000227066
CENPE	3.60884	18	0.000276167
CHRND	0	4	0.25
CHRNB1	0	4	0.25
TEK	3.54873	4	0.000256082
FGR	3.08797	8	0.000297708
KMO	1734	4	0.000174978
DUSP1	1.88144	18	0.00032113
CHRNG	0	2	0.2
FARS2	0	2	0.2
KCNJ1	2.96667	4	0.000267953
ABAT	2.82873	4	0.000197824
MAP3K14	2.46367	8	0.000290023
DUSP3	1.88144	14	0.000314663
CPA1	1734	4	0.000170911
CHRNB3	2.4	4	0.000218484
GABRG2	2	8	0.000176149
PDE11A	2.32727	4	0.000232288
PDE10A	2.32727	4	0.000232288
PDE1C	2.32727	4	0.000232288
TTK	0.869048	18	0.000274876
S1PR1	2	4	0.000253293
BRD2	1.68182	6	0.000263852
NLK	1.75054	4	0.000297265
WEE1	0.673428	16	0.000294464
PKN2	1.53904	6	0.00028393
NOD1	1.67215	4	0.000257069
ITGA1	0	20	0.000284091
TEC	0.910221	6	0.000272702
CBX4	0	16	0.000284172
CBX7	0	16	0.000284172
CBX8	0	16	0.000284172
RPS6KA1	0.5	10	0.000313087
CCNB3	0.269388	12	0.000276167
NEK2	0	14	0.000274876
PBK	0	14	0.000274725
ALDH1A1	0	14	0.000258799
CYP26B1	0	14	0.000258799
CYP26A1	0	14	0.000258799
STS	0	14	0.000253872
PTPN2	0	12	0.000313185
TXK	0	12	0.000297619
ALOX12	0	12	0.000280662
IMPDH2	0	12	0.000242189
IMPDH1	0	12	0.000242189
RPS6KA4	0.176471	8	0.000282965
SELE	0	10	0.00027049
APH1B	0	10	0.000266383
RARG	0	10	0.000257798
RARB	0	10	0.000257798
CHRNA7	0	10	0.000218627
RPS6KA3	0	8	0.000312989
RPS6KA2	0	8	0.000312989
DAPK2	0	8	0.000308737
DAPK3	0	8	0.000308737
INSRR	0	8	0.000297619
CTSD	0	8	0.000292826
MAPKAPK5	0.176471	6	0.000282885
P2RX3	0	8	0.000264131
P2RX7	0	8	0.000264131
P2RX4	0	8	0.000264131
HTR2B	0	8	0.000264061
DBF4	0	8	0.000259538
NR1H2	0	8	0.000257865
AGTR2	0	8	0.000253614
TAOK1	0	8	0.000251446
TAOK2	0	8	0.000251446
TAOK3	0	8	0.000251446
QDPR	0	8	0.00024888
F10	0	8	0.000223164
F7	0	8	0.000223164
HSF1	0	6	0.000316556
PTPRA	0	6	0.000310559
PHLPP2	0	6	0.000307977
MKNK2	0	6	0.000307787
CTSK	0	6	0.000289017
PGK1	0	6	0.000288268
PARP3	0	6	0.000284657
CAMK2D	0	6	0.000280505
PTPRF	0	6	0.000277008
SHH	0	6	0.000259943
CTSG	0	6	0.000255885
ELANE	0	6	0.000255885
SIRT3	0	6	0.000255037
PLAU	0	6	0.000237982
PLAUR	0	6	0.000237982
UGCG	0	6	0.000226963
GBA2	0	6	0.000226963
GABRB2	0	6	0.000176118
SMYD2	0	4	0.000328084
SLC2A1	0	4	0.000320102
KCNMA1	0	4	0.000309598
ATP1A1	0	4	0.000307314
BCL2A1	0	4	0.000306373
HSPA1A	0	4	0.000306373
CSF1R	0	4	0.000294985
CA9	0	4	0.000289855
CTSH	0	4	0.000288934
CTSC	0	4	0.000288934
CTSV	0	4	0.000288934
PI4KB	0	4	0.000286615
PIK3C2G	0	4	0.000286615
KDM5B	0	4	0.000284495
KDM5C	0	4	0.00028401
KDM6B	0	4	0.000283286
TNK2	0	4	0.000282725
EIF2AK1	0	4	0.000280426
PLA2G2A	0	4	0.000279955
CAMK1	0	4	0.000276167
EPHA1	0	4	0.000271518
EPHA4	0	4	0.000270051
EPHA3	0	4	0.000270051
EPHA7	0	4	0.000270051
EPHB2	0	4	0.000270051
BRD3	0	4	0.000263644
PBRM1	0	4	0.000263505
HMOX1	0	4	0.000262605
PGD	0	4	0.000261233
AHCY	0	4	0.000260078
S1PR3	0	4	0.000258598
SORT1	0	4	0.000253936
MIF	0	4	0.000253872
MAP3K6	0	4	0.000251319
KLK1	0	4	0.00024975
MMP3	0	4	0.000249626
CAPNS1	0	4	0.000248016
ADRB1	0	4	0.000247831
ADRB3	0	4	0.000247831
TNNC1	0	4	0.000245278
TNNT2	0	4	0.000245278
SLC5A2	0	4	0.00024426
GLP1R	0	4	0.00024426
ABCB11	0	4	0.000239578
ADORA1	0	4	0.000234907
ADORA3	0	4	0.000234907
LTA4H	0	4	0.000231214
ALOX5AP	0	4	0.000231214
EBP	0	4	0.000230362
PORCN	0	4	0.000229727
WNT3	0	4	0.000229727
PDE5A	0	4	0.000228624
CDK13	0	4	0.000226912
FAAH	0	4	0.000226296
CALCRL	0	4	0.000224165
RAMP1	0	4	0.000224165
SOAT2	0	4	0.000220556
SOAT1	0	4	0.000220556
CCR8	0	4	0.000220459
TK1	0	4	0.000219877
CHRNA5	0	4	0.000218436
HTR1D	0	4	0.000210793
ECE1	0	4	0.000198847
MPI	0	4	0.000196194
PFKFB3	0	4	0.000196194
ATP4B	0	4	0.000194894
GABRA4	0	4	0.000176087
GAA	0	4	0.000175531
HIPK4	0	2	0.000314861
KMT5A	0	2	0.000314861
PIN1	0	2	0.000314861
ATAD2	0	2	0.000307692
KCNK2	0	2	0.000304414
BMX	0	2	0.000302206
SLC5A1	0	2	0.000296384
RASGRP1	0	2	0.000289939
RASGRP3	0	2	0.000289939
BAZ2A	0	2	0.00028393
KDM5A	0	2	0.00028393
TUBB1	0	2	0.000280505
TUBB3	0	2	0.000280505
MARK1	0	2	0.000280505
DNM1	0	2	0.000278552
RET	0	2	0.000278552
PITRM1	0	2	0.000277239
NAE1	0	2	0.000277239
PLA2G10	0	2	0.000271813
NOX4	0	2	0.000270783
EPHA8	0	2	0.000269978
EPHB3	0	2	0.000269978
EPHB4	0	2	0.000269978
EPHA6	0	2	0.000269978
EPHB1	0	2	0.000269978
EPHA5	0	2	0.000269978
CMA1	0	2	0.000269906
CDC42BPA	0	2	0.000269107
MARK3	0	2	0.000265816
PHKG2	0	2	0.000263852
CA2	0	2	0.000263713
CX3CR1	0	2	0.000263574
IGFBP5	0	2	0.000263019
PRMT8	0	2	0.000259471
HDAC10	0	2	0.000257666
OGA	0	2	0.000257467
HASPIN	0	2	0.000257467
MERTK	0	2	0.000256082
MAP3K10	0	2	0.000255754
MAP3K13	0	2	0.000255754
MAP3K12	0	2	0.000255754
S1PR2	0	2	0.000253165
ACKR3	0	2	0.00025227
DRD1	0	2	0.000252207
PLAA	0	2	0.000251067
MMP14	0	2	0.000249252
MMP7	0	2	0.000249252
LGALS9	0	2	0.000246184
PTPRCAP	0	2	0.000246184
ATP2A1	0	2	0.000243072
ACPP	0	2	0.000238607
CECR2	0	2	0.00023663
HDAC8	0	2	0.00023663
PRKCH	0	2	0.000235849
GNRHR	0	2	0.000235793
GSTK1	0	2	0.000235239
CHRM4	0	2	0.000234852
PHOSPHO1	0	2	0.000231107
DKK1	0	2	0.000229674
ADORA2B	0	2	0.000229568
PDE9A	0	2	0.000228258
POLA1	0	2	0.000227687
LAP3	0	2	0.000227221
MC1R	0	2	0.000226603
PDE8B	0	2	0.000225938
PDE4B	0	2	0.000225938
PDE7A	0	2	0.000225938
OAT	0	2	0.000224366
FPR1	0	2	0.000223614
RBP4	0	2	0.000223614
GPBAR1	0	2	0.000222916
SLC10A2	0	2	0.000222916
FABP5	0	2	0.000222717
CNR2	0	2	0.000221141
TRPV3	0	2	0.000221043
LIPA	0	2	0.000220507
GPR119	0	2	0.000219829
SLC18A3	0	2	0.000219539
CPT2	0	2	0.000217912
FABP2	0	2	0.000216591
FABP3	0	2	0.000216591
HLA-DRB1	0	2	0.000216497
USP47	0	2	0.000215936
TDP2	0	2	0.000215517
ABHD6	0	2	0.000215239
LIPG	0	2	0.000215239
SCN9A	0	2	0.0002151
SCN4A	0	2	0.0002151
F13A1	0	2	0.000214133
DRD3	0	2	0.000211864
CASR	0	2	0.000210793
CYP24A1	0	2	0.000210615
LNPEP	0	2	0.000208117
HCN1	0	2	0.000205846
DUT	0	2	0.000205212
ABCC9	0	2	0.000204207
EIF4H	0	2	0.000202224
PDCD4	0	2	0.000202224
PABPC1	0	2	0.000202224
DPP8	0	2	0.000201735
DPP9	0	2	0.000201735
ADAMTS4	0	2	0.000197006
TACR3	0	2	0.000196002
TACR1	0	2	0.000196002
TACR2	0	2	0.000196002
P2RY1	0	2	0.000194818
FADS1	0	2	0.000189466
IDH1	0	2	0.000185082
KHK	0	2	0.000181851
PRPF4B	0	2	0.000181686
FNTB	0	2	0.000171057
PGGT1B	0	2	0.000171057
AADAT	0	2	0.00015193
CTRC	0	2	0.000148854

## Sheet: Table 6
Supplementary Table 6: LDH-PPI
target name	Betweenness_unDir	Degree_unDir	Closeness_unDir
TP53	73358.8	178	0.000600601
STAT3	38930.4	104	0.000588582
AKT1	25674.4	120	0.000581058
TNF	28546.2	118	0.000565931
IL6	29957.5	114	0.000560852
JUN	27049.6	96	0.000563698
FN1	34286.5	90	0.000536193
ESR1	19637.9	78	0.000571755
EGFR	18766.3	78	0.000555556
MAPK3	11977	80	0.000538213
CD44	23825.9	76	0.000505561
NFKB1	9552.46	74	0.000541712
PTGS2	34560.7	34	0.000518672
IL1B	8527.47	86	0.000528541
CTNNB1	14471.7	72	0.00052687
MAPK1	7236.24	74	0.000535619
HDAC1	10476.2	74	0.000513611
HSP90AB1	10482.6	64	0.000521376
CASP3	10037.3	56	0.000530504
MYC	6274.17	66	0.000529101
BCL2	9357.25	66	0.000520562
RELA	6323.75	62	0.000531915
CREBBP	9566.52	54	0.000525486
TRAF6	12831.9	46	0.000524384
IFNG	7152.93	88	0.000493827
RPS27A	22354.5	56	0.000485909
ERBB2	8014.71	48	0.000527983
BRCA1	16317.9	62	0.000490677
APRT	24	8	0.111111
PIK3CA	4931.89	58	0.000515198
AKT2	2970.45	64	0.000511247
AKT3	2970.45	64	0.000511247
FOS	4913.03	50	0.000517866
CCND1	2775.02	50	0.000521648
PIK3R1	5734.89	62	0.000500751
BCL2L1	6435	54	0.000504541
CXCL8	4806.99	68	0.000492126
MDM2	5534.77	46	0.000511247
MMP9	11304.6	54	0.000486618
HIF1A	1529.14	40	0.000523013
CASP8	4743.09	54	0.000496771
PPARG	6998.5	36	0.000507357
IL10	1987.45	74	0.000478469
IL1A	2869.23	62	0.000488043
GSK3B	5127.08	44	0.000499251
CD8A	9730.48	58	0.00047081
CCL5	5143.33	58	0.000478927
ACTB	8757.2	42	0.000485437
MAPK14	3225.96	42	0.000499251
NFKBIA	3612.26	30	0.000510725
IGF1	4701.66	34	0.000503778
CDKN1A	2507.91	46	0.00049554
TGFB1	6635.14	42	0.000488759
FGF2	6620.34	38	0.000492854
MAPK12	3117.6	40	0.000498753
ICAM1	4551.72	38	0.000496032
CHUK	1008.48	38	0.000503271
PIK3CB	3139.69	54	0.000479157
CDH1	5472.37	30	0.00049334
PIK3CD	1817.69	52	0.000478927
IKBKB	777.781	34	0.00050025
IL4	1568.08	58	0.000472144
CXCL1	2037.67	50	0.000479157
IRS1	3820.89	44	0.000478927
RAF1	2934.82	50	0.000474158
SIRT1	2240.03	38	0.000488281
CCL2	1435.83	48	0.000479846
MTOR	3243.27	38	0.000484496
LYN	6828.94	42	0.000470588
IL2	2002.96	52	0.000471476
ALB	11603.3	36	0.000461042
DCN	4287.61	38	0.000475737
YWHAZ	2409.3	26	0.000492126
IL17A	3976.37	40	0.000471698
CDC42	3188.5	30	0.000483559
LEP	11284	22	0.000471476
CCNA2	6232	40	0.000464037
CEBPB	1130.32	28	0.000489237
CAV1	3575.64	28	0.000482393
ARRB2	10615.2	30	0.000460617
IL18	2918.98	36	0.000473037
XIAP	1033.65	30	0.000482859
MMP2	3446.7	36	0.000468604
ITGAM	4408.1	30	0.000471254
AURKA	4095.66	22	0.000479846
VCAM1	1699.75	32	0.000474383
NR3C1	389.155	18	0.000491884
CALM3	8111.75	28	0.000461681
MYD88	1555.33	32	0.000473037
CDKN2A	475.591	30	0.000477555
MET	642.669	24	0.000483325
LCK	2526.7	18	0.000484262
CSF2	1305.56	50	0.000453515
TNFRSF1A	788.43	38	0.000465766
RIPK1	1256.33	32	0.00047081
NFE2L2	5060.76	22	0.00047081
CDK2	2887.91	42	0.000454959
CASP9	988.993	30	0.00047081
STAT5B	1970.81	30	0.0004662
E2F1	464.955	34	0.000465116
CYP2E1	10013.9	64	0.000409836
PRKCB	5113.15	30	0.000456621
DNMT1	1085.32	20	0.000476644
PPARGC1A	4819.95	32	0.000452899
CDKN1B	800.998	32	0.000462963
RPS6KB1	598.282	24	0.000471698
TNFRSF10B	1430.09	20	0.000471254
FASLG	2240.61	26	0.000462535
CXCL10	1320.92	50	0.000439754
NCF1	1541.72	28	0.000460829
APP	8072.3	26	0.000446229
ITGB2	1670.93	38	0.00044964
ITGB3	2629.9	40	0.000445038
IRF1	343.768	14	0.00047619
CCNB1	872.503	32	0.000455581
CDK4	431.744	36	0.000451875
EGR1	306.479	18	0.000470146
PRKCD	1211.3	36	0.00044843
ATM	1482.55	28	0.000455789
BAX	1512.74	32	0.000451467
NCF2	1110.36	26	0.000458295
VAV1	638.783	22	0.000463177
APAF1	332.72	22	0.000463822
IL13	159.267	40	0.000444444
CDC37	497.962	20	0.000463392
IL1R1	1947.1	26	0.000451875
ITGA2B	1906.27	36	0.000441306
VCL	1651.53	24	0.000454133
IL6R	77.799	24	0.000456621
PARP1	786.359	20	0.000458505
CYBA	665.738	22	0.000456204
CYBB	665.738	22	0.000456204
HSPA5	3754.36	22	0.000448029
IL7	256.846	36	0.000442087
ILK	1338.93	26	0.00044964
BIRC5	1135.9	20	0.000456413
EZR	1160.42	16	0.000458926
MCL1	358.046	22	0.000454545
CYP2C9	5445.04	54	0.00040783
TERT	63.7955	12	0.000465116
STAT6	530.854	22	0.000452899
IL6ST	333.11	20	0.000455166
TYK2	540.409	26	0.000447427
IL5	296.15	34	0.00043956
DDX5	5104.46	10	0.000452489
S100B	2712.12	10	0.000458295
TIMP1	965.188	20	0.000451467
CD74	6238.51	24	0.000433839
NOS2	2576.94	18	0.000449236
IL23R	1269.54	20	0.000450248
IL2RG	1524.88	28	0.000441112
HSPB1	418.767	12	0.000460405
SPP1	4680.73	22	0.000439174
HGF	219.857	16	0.000456621
HMGB1	934.626	10	0.000460829
CAPN2	1460.73	16	0.000453104
CAPN1	1460.73	16	0.000453104
GUK1	16	4	0.1
CASP1	1110.53	24	0.00044484
CCL11	617.928	42	0.000426803
GSTP1	7604.09	20	0.000431593
NLRP3	439.215	16	0.000452694
CCL4	198.484	32	0.0004363
BAD	349.001	26	0.000442087
NOS3	1405.11	20	0.000445434
ATF4	4086.43	18	0.000439947
NGFR	2226	18	0.00044405
CSNK2A1	206.128	10	0.000457038
BRD4	1424.07	12	0.000451671
CCL3	173.039	30	0.00043592
IFNA1	234.012	14	0.000452284
PIK3CG	1176.1	22	0.000441306
PXN	3199.82	16	0.000441891
CALM1	953.064	16	0.000447427
FAS	121.764	20	0.000445236
ITGA2	859.762	26	0.000436491
CD36	2333.57	20	0.000438982
LEPR	2609.62	8	0.000450653
APOE	5328.91	26	0.000424809
YAP1	3246.32	14	0.000442282
HBEGF	1829.11	18	0.000441501
TGFBR2	4439.03	18	0.000434405
RB1	105.45	20	0.000443066
FGFR1	402.949	18	0.000443853
BAK1	84.7071	20	0.000442478
IL2RA	85.8825	28	0.000434028
SELP	1707.68	30	0.00042735
CRP	2915.15	14	0.000440723
IL7R	1380.72	24	0.000433651
XRCC6	580.918	20	0.000439367
COL1A2	2650.98	28	0.000425532
LIF	48.3076	10	0.000450857
NQO1	3911.74	10	0.000440529
TNFSF10	1260.54	24	0.000432526
SELL	2145.88	22	0.000432152
CCNE1	98.1482	22	0.000436681
BBC3	51.3161	18	0.000440529
APOA1	5195.46	34	0.000410846
CD40LG	336.305	16	0.000440723
G6PD	5452.15	6	0.000438212
SUMO1	4881.86	8	0.000437063
CYP1A1	4188.16	58	0.000386399
YWHAE	251.553	12	0.000444247
COL1A1	1386.15	28	0.000424628
PMAIP1	51.0661	16	0.000440335
AHR	2977.6	6	0.00044287
CHEK2	194.116	14	0.000440917
TNFRSF10A	314.243	22	0.000432152
GP6	1770.45	30	0.000419992
TFAM	716.781	10	0.000442087
NCOR2	875.066	20	0.000431034
PPARA	1664.81	12	0.000436491
CD274	362.487	6	0.000445236
GP1BA	1094.15	16	0.000432152
VDAC1	2437.47	26	0.00041806
FOSB	109.532	18	0.000432152
DDIT3	2994.75	20	0.000422297
IL4R	21.2263	22	0.00042735
CDH2	138.517	12	0.000437445
CASP6	4220.02	14	0.000424989
CTSB	1530.16	18	0.00042735
GDNF	4260.14	12	0.000426621
IRF9	2654.96	14	0.000428449
CYP2B6	3532.87	40	0.000398406
MAP2K1	144.826	20	0.000427716
EIF4EBP1	127.114	12	0.000435161
BCL2L11	374.626	26	0.00041841
TRIM21	221.393	8	0.000437254
HCK	217.583	8	0.000437063
ATR	117.226	10	0.000434594
THBS1	516.378	20	0.000423012
CSF3R	64.4534	6	0.000438596
CYP1A2	4561.94	60	0.000370645
EHMT2	92.6352	10	0.000433839
RPS6	943.188	20	0.000420698
FGA	1278.88	20	0.000419815
BID	312.384	28	0.000413565
SPARC	454.702	20	0.000421408
PRKCE	1555.38	18	0.000420168
HMMR	1393.76	12	0.000425351
CASP7	209.554	16	0.00042337
PMS2	86.7201	6	0.000433839
FBN1	2231.21	22	0.000411353
CXCR3	235.594	36	0.000400641
SLC2A1	330.155	6	0.000431406
HDAC4	1751.73	14	0.000419463
MAP2K2	37.6394	16	0.000421408
IL12RB2	1708.4	16	0.000417188
THRB	141.674	14	0.000422654
CX3CL1	173.503	24	0.000411862
PRL	1844.97	10	0.000422297
BDNF	2619.01	10	0.000420168
SOCS2	122.486	6	0.000430108
PINK1	1128.15	18	0.000414938
ACAN	5321.23	20	0.000402091
BMP2	3989.41	12	0.000413736
DLG4	3636.65	20	0.000405186
PECAM1	167.099	6	0.000428449
CDC25A	47.3152	22	0.000412031
CYP3A4	3522.91	60	0.000363504
FGG	849.968	16	0.000416146
TLR3	84.7062	12	0.000421585
CYP4A11	4723.65	24	0.000397298
TGFA	35.4733	12	0.00042123
IL1RN	39.5253	14	0.000419111
FCER1G	2784.36	18	0.000407664
COL3A1	708.307	22	0.000408664
PHB2	653.116	8	0.00042337
HDAC3	149.513	14	0.000417711
GSR	5252.59	22	0.000396197
ITGA5	302.265	16	0.000414594
PRNP	507.329	12	0.00041806
MMP3	419.677	16	0.000413736
HPGDS	1466.44	26	0.000400481
SNCA	2592.23	20	0.000403877
HCLS1	887.728	16	0.000412201
EEF1A1	2596.56	20	0.000402901
CCND3	32.7601	18	0.000411184
PLA2G4A	652.19	10	0.00041684
TCF4	2744.31	10	0.000411184
CYP2C19	3419.87	22	0.000396668
GJA1	353.701	10	0.000416493
IL2RB	172.987	22	0.000404367
SCARB1	1070.91	14	0.000409668
CXCL9	451.778	30	0.000394477
LCN2	370.902	8	0.000417537
PDGFB	16.8419	8	0.000418235
SOD1	1662.73	14	0.000407498
CSF1	176.588	6	0.000419463
ELN	1487.64	12	0.000409836
DLG1	2243.03	14	0.000405844
MMP14	1608.13	14	0.000407332
POMC	9092.29	26	0.000374953
BGLAP	380.909	12	0.000411353
CTSL	689.291	12	0.000410341
ITGB4	460.933	12	0.000410678
FGB	478.293	14	0.000408497
H2AX	2865.2	18	0.000397298
FGF9	197.399	8	0.000414422
CFLAR	21.0238	18	0.000403551
COMP	187.365	12	0.000408664
F2	2605.49	24	0.000390016
GSN	310.781	10	0.000410004
PTGS1	245.471	18	0.000401284
PF4	202.565	22	0.000396668
SDC4	184.979	12	0.000407
TNFAIP6	62.1753	4	0.000415628
BIN1	630.447	4	0.000413223
ASIC1	0	2	1
ASIC2	0	2	1
CHRNA3	0	2	1
CHRNA5	0	2	1
HDC	0	2	1
HNMT	0	2	1
IL20	0	2	1
IL24	0	2	1
KCNK10	0	2	1
KCNK2	0	2	1
NAA15	0	2	1
NAA38	0	2	1
RPN1	0	2	1
SSR3	0	2	1
SCN1B	0	2	1
SCN9A	0	2	1
SLC22A7	0	2	1
SLC22A8	0	2	1
SULT1A1	0	2	1
SULT1A3	0	2	1
TNFRSF18	0	2	1
TNFSF18	0	2	1
IBSP	79.0631	14	0.000403226
TNFSF11	640.369	10	0.000404858
MMP7	54.4108	10	0.00040568
IL15	16.5997	22	0.000392619
HSF1	206.727	6	0.000408831
KNG1	4548.33	26	0.000376932
PRKN	3092.81	16	0.000390778
FMOD	88.0098	10	0.000404367
CYP1B1	1123.17	44	0.000365898
MPO	3921.84	12	0.000392157
SOX9	1619.24	8	0.000401929
CD151	19.3691	4	0.000409668
DNMT3A	17.5089	10	0.000402576
VCAN	378.142	10	0.000400802
PTK2B	834.282	16	0.000393082
MYOD1	2625.22	8	0.000396511
THBS2	135.84	12	0.000398406
WNT1	1322	6	0.000401606
CKS1B	37.6008	14	0.00039604
CCL19	198.857	16	0.000393082
SLC2A4	1358.11	8	0.000398089
DNM1L	321.517	10	0.000398089
SPTAN1	85.8621	6	0.000402739
PHB	29.1437	6	0.000402253
AGT	1753.93	18	0.000385356
NOTCH3	281.61	6	0.000400962
YWHAQ	19.991	10	0.000396983
NLRX1	3991.85	4	0.000392465
CCR3	11.4338	24	0.000380952
RPS16	67.9231	14	0.000390625
RPS19	67.9231	14	0.000390625
PF4V1	62.8085	16	0.000388048
GSTM1	3851.59	18	0.00037594
IDO1	2224.19	10	0.00038835
COL2A1	716.524	12	0.000389864
RPL34	28.1525	12	0.000390472
PSMC6	138.528	6	0.000394322
BNIP3L	1322	6	0.000391236
GZMA	1498.64	12	0.000383289
TBL1X	24.3213	6	0.000392927
B2M	1799.63	12	0.000381971
GHR	23.8622	8	0.000389864
SFPQ	1521.23	8	0.000385505
TGFB3	48.0423	10	0.000386698
RAC1	79.8323	10	0.000386548
TIMP3	26.2119	10	0.000386399
DLGAP5	81.1066	12	0.000384025
SMURF2	1887.44	8	0.000382409
COL9A1	15.3632	10	0.000384468
IGF2	28.6807	6	0.00038835
POLR2A	3963	8	0.000376081
ACACA	4036	8	0.000375516
CTSG	612.453	8	0.000384025
UBE2K	90.3217	4	0.000388954
MAPKAPK3	18.1225	8	0.00038432
LAMC2	1363.66	6	0.000382555
PRKAA1	415.277	6	0.000384911
COL4A2	105.402	6	0.00038506
PIK3C2A	195.536	6	0.000384468
IQGAP2	51.8874	6	0.000384615
PFN1	33.7298	8	0.000381825
CAPZA1	184.331	6	0.000382702
AGTR1	813.796	12	0.000374813
NME6	10	4	0.0769231
HMOX1	418.015	6	0.000379363
NEFL	21.3064	6	0.000380228
NPY	4198.29	12	0.000363372
ANPEP	2470.67	6	0.000373413
CD24	28.4852	4	0.000380952
PICALM	283.937	6	0.000377501
TRPV1	773.152	6	0.000375375
GSTT2B	112.552	20	0.000359454
STAMBP	2640	4	0.000368324
COL9A2	10.0632	8	0.00038373
COL9A3	10.0632	8	0.00038373
THBS4	16.8081	8	0.000369822
F2R	156.887	6	0.000371471
PPP1R15A	5133.17	12	0.000351989
ACE	245.94	10	0.000365631
SERPINA3	57.1034	6	0.000369413
UBE2B	1322	4	0.000368053
TACC3	18.779	4	0.000369549
OPRM1	1493.92	8	0.000361533
TUBA1A	12.6527	4	0.000369413
CD79A	119.633	4	0.00036914
IL23A	25.5297	10	0.000362713
MCM5	3252.19	8	0.000356125
MFN1	120.661	12	0.000359712
SERPINA1	75.429	6	0.00036483
HNRNPA1	2226.4	14	0.000350877
EDNRB	490.071	8	0.00036075
VKORC1	220.656	6	0.00036245
NGF	163.718	6	0.00036245
GSTO1	99.9578	18	0.00034965
IL17RA	1322	4	0.000359842
KCNQ1	2640	6	0.000354233
PLA2G6	10.5395	6	0.000359971
GFAP	27.5075	4	0.000361925
MS4A2	121.772	6	0.000359454
NKG7	44.6305	6	0.000359583
HNRNPC	997.681	12	0.000350754
AP2B1	85.7737	4	0.000359454
NAT2	920.928	12	0.000348432
NAT1	920.928	12	0.000348432
TOMM20	155.081	10	0.000351989
GNLY	50.1366	6	0.000356252
SOD2	154.633	6	0.000355872
AKR1C3	164.159	30	0.000330469
CES1	802.967	12	0.000347464
GAP43	80.2733	4	0.000357398
UGT1A6	170.222	30	0.000329598
UGT1A1	170.222	30	0.000329598
UGT1A10	170.222	30	0.000329598
UGT1A7	170.222	30	0.000329598
UGT1A8	170.222	30	0.000329598
RANBP2	2647.63	6	0.000348311
MCM6	738.895	6	0.000350754
TYR	1322	4	0.000351
COMT	642.785	10	0.000345304
COL5A2	53.5608	16	0.000340136
GSTA1	97.9334	16	0.000339328
GSTA2	97.9334	16	0.000339328
UGT1A3	91.798	26	0.000328839
PLD2	2	4	0.5
IL12B	34.9014	8	0.000347584
CANX	41.598	6	0.000348918
SERPINB2	4	6	0.333333
WBP2	1337.26	6	0.000345066
GSTM3	97.9334	14	0.000339213
AKR1C1	73.3929	24	0.000328407
CX3CR1	7.57961	16	0.000379363
FPR2	1322	4	0.000344828
GGT1	4123.53	6	0.00033557
G6PC3	2640	4	0.000340252
HLA-DRB1	28.1525	4	0.00034626
UGT2B7	169.023	20	0.000329056
TNFRSF11B	10.6729	4	0.000346021
PDCD10	1322	4	0.000342231
COL11A1	18.7913	12	0.000337041
ODC1	1322	4	0.000341413
PPIG	22.3444	18	0.000329381
POR	161.931	12	0.000334448
UQCRC2	3329.02	18	0.000320205
UBA2	1322	4	0.000339328
LMNA	2642	6	0.000332226
REN	427.133	10	0.000333333
ALDH1A1	18.6808	14	0.000328947
COL11A2	7.30726	8	0.000334672
GFRA3	1322	4	0.000333
OPRD1	386.564	8	0.000329924
FBN2	1322	6	0.000328192
ADH1B	161.613	8	0.000328947
FLOT2	7.07195	4	0.000386997
BMP7	1322	4	0.000325098
CXCL6	6.21095	14	0.000369822
ALDH2	2642.67	8	0.000316156
MMP13	1323	8	0.000318066
DNMT3B	6.3239	10	0.000394789
ATP6V0B	0	4	0.5
TCIRG1	0	4	0.5
ATP6V0D1	0	4	0.5
MYOG	48.786	4	0.000323729
PCBP1	250.399	6	0.000320307
PDYN	308.328	10	0.000315856
PAX3	1331.61	6	0.000314564
XDH	2640	10	0.000305717
BAZ1B	1322	4	0.000314861
CXCL5	5.47675	14	0.000376223
P2RY12	1322	4	0.000314465
DIABLO	5.66212	10	0.000386548
AIMP2	1322	4	0.000310752
CYC1	681.606	18	0.000297708
HNRNPU	91.28	8	0.000308642
NPR1	1336.94	6	0.000301023
MED4	1322	4	0.000301386
MT-ND1	336.343	16	0.000291206
MT-CO1	336.343	16	0.000291206
TMSB4X	5.11014	6	0.000371195
CS	1322	4	0.000301023
GAL	1326.94	8	0.000296209
CRH	14.9406	6	0.000300933
VIP	31	12	0.000293945
MT-CO2	212.653	14	0.000291121
GC	5.06269	4	0.000355492
ADORA2A	14.9406	4	0.000300842
PTGER2	14.9406	4	0.000300842
CHMP1A	1322	4	0.000296384
FGR	4.68289	4	0.000351124
PPARD	4.51333	4	0.000352609
CDS1	0	2	0.333333
RALB	0	2	0.333333
LIG1	1322	4	0.000288434
SEC13	1322	4	0.000283286
LTC4S	2640	6	0.000274952
LCT	1322	4	0.000277932
PLAU	0	4	0.25
PLAUR	0	4	0.25
MSH6	2.33333	10	0.00037679
TNFRSF1B	2.34127	8	0.000413565
PLAT	0	2	0.2
JUND	1.65333	14	0.000417362
JUNB	1.65333	14	0.000417362
AKR1C2	1.25	18	0.000272331
PPBP	1.27942	12	0.000367107
CDK3	0.880769	14	0.000384763
MMP1	1.06667	8	0.000384763
GADD45A	0.929032	8	0.000442282
COX5A	0.333333	12	0.000268097
NDUFS4	0.333333	12	0.000268097
MT-ND3	0.333333	12	0.000268097
ADK	0	2	0.0714286
ENTPD4	0	2	0.0714286
TYMP	0	2	0.0714286
DUSP1	0.1	12	0.000428816
FOSL2	0	12	0.000416493
FOSL1	0	12	0.000416493
ENTPD2	0	2	0.0555556
BMF	0.181818	8	0.000391236
NFKBIB	0	10	0.000415455
COL5A1	0	10	0.000339443
OSM	0	8	0.000444247
TNFRSF25	0	8	0.000413052
IL1R2	0	8	0.000393391
ERCC5	0	8	0.000376648
EIF2S2	0	8	0.000370233
NOX4	0	8	0.000353607
PON1	0	8	0.000340252
APOA4	0	8	0.000340252
APOC1	0	8	0.000340252
MTA1	0	6	0.000450248
ETS2	0	6	0.000446828
LTA	0	6	0.000412201
EREG	0	6	0.000411015
CCN2	0	6	0.000403388
PTGES	0	6	0.000390016
TBX21	0	6	0.000384911
TGFB2	0	6	0.000381243
GPT	0	6	0.000364564
IL5RA	0	6	0.000363504
MKI67	0	6	0.000361141
TNFRSF10D	0	6	0.000360101
ASL	0	6	0.000353107
OTC	0	6	0.000353107
ABCA1	0	6	0.000351247
CAST	0	6	0.000348918
CAPNS1	0	6	0.000348918
DLG2	0	6	0.000337154
DLG3	0	6	0.000337154
KPNA3	0	4	0.00040016
NFKBIZ	0	4	0.00040016
DUSP6	0	4	0.000399202
KDM5B	0	4	0.000397772
PLA2G2A	0	4	0.000392003
TNFRSF11A	0	4	0.000391236
HSPA1A	0	4	0.000388651
COL18A1	0	4	0.000381679
ICAM3	0	4	0.000380662
PI4KB	0	4	0.000378215
IGF2R	0	4	0.000378072
XRCC3	0	4	0.000374672
ACTR3	0	4	0.000372856
PSMD12	0	4	0.000369686
NRF1	0	4	0.000365097
HLA-G	0	4	0.000364299
MR1	0	4	0.000364299
IL1RL1	0	4	0.000361141
IL18RAP	0	4	0.00036049
IL18R1	0	4	0.00036049
TF	0	4	0.000358809
CAPZA2	0	4	0.000354484
SLC25A5	0	4	0.000347705
PPIB	0	4	0.000346021
SMURF1	0	4	0.000345423
LPA	0	4	0.00034002
DLGAP1	0	4	0.000337041
SLC6A4	0	4	0.000335121
OAS1	0	4	0.000334001
MX1	0	4	0.000334001
CSTA	0	4	0.000333333
IL12A	0	4	0.000327225
EPHX2	0	4	0.000321647
FCER1A	0	4	0.000321234
CAT	0	4	0.00032113
ADAMTS3	0	4	0.000317864
ADAMTS4	0	4	0.000317864
ADORA1	0	4	0.000301841
ADORA3	0	4	0.000301841
CES2	0	4	0.000300752
ORC4	0	4	0.00029163
KCNE1	0	4	0.000287109
KCNH2	0	4	0.000287109
HNRNPDL	0	4	0.0002849
TRA2B	0	4	0.0002849
BTN3A2	0	4	0.000254388
PLIN2	0	4	0.000254388
CYSLTR1	0	4	0.000232721
CYSLTR2	0	4	0.000232721
S100A4	0	2	0.000429923
ZNF385A	0	2	0.000429923
CLEC3B	0	2	0.000411862
TNS3	0	2	0.000406339
DUSP5	0	2	0.000396983
ERBIN	0	2	0.000391389
FER	0	2	0.000390778
KDM3A	0	2	0.000379939
SLC7A11	0	2	0.000378931
CHKA	0	2	0.000375375
CD55	0	2	0.000373552
CLDN7	0	2	0.000372024
TEK	0	2	0.000371747
BAP1	0	2	0.000370508
ASPN	0	2	0.000369413
RHOG	0	2	0.000363901
PAG1	0	2	0.000358938
ADRB2	0	2	0.000353107
KIF3A	0	2	0.000353107
PLCD4	0	2	0.000350754
IL1RL2	0	2	0.000347947
PITRM1	0	2	0.00034459
MMP17	0	2	0.000341763
IL21	0	2	0.00034153
OLR1	0	2	0.000341297
CPT1A	0	2	0.000338753
GDF15	0	2	0.000337496
HLA-DQB1	0	2	0.000337154
MIF	0	2	0.000337154
TSLP	0	2	0.000337041
BMP6	0	2	0.000324886
ID2	0	2	0.000323311
LILRA2	0	2	0.00032113
FURIN	0	2	0.000320924
DLGAP3	0	2	0.000319591
AMH	0	2	0.000317561
WIF1	0	2	0.00031736
RAB2A	0	2	0.000315159
GABARAP	0	2	0.000310849
F9	0	2	0.000310078
KLRB1	0	2	0.00030581
COL7A1	0	2	0.000305344
USP15	0	2	0.00030525
TAP2	0	2	0.000304971
TAF6	0	2	0.000301205
HLCS	0	2	0.000300842
PCSK1	0	2	0.000300481
UBE2A	0	2	0.000296033
NR1I2	0	2	0.000293083
IL17B	0	2	0.000290698
DCT	0	2	0.0002849
FPR1	0	2	0.00028082
STRN4	0	2	0.000279096
SAT1	0	2	0.000278552
SUMO3	0	2	0.000277162
ARTN	0	2	0.000272926
ZMPSTE24	0	2	0.000272405
SUN2	0	2	0.000272405
ADAMTS17	0	2	0.000269687
FST	0	2	0.000267594
COL10A1	0	2	0.000262812
AKR1A1	0	2	0.000261506
EHHADH	0	2	0.000261506
DEK	0	2	0.00026062
MYF5	0	2	0.000260417
P2RY1	0	2	0.000260349
IARS1	0	2	0.000257798
CDK19	0	2	0.000251319
DLST	0	2	0.000251067
NPPB	0	2	0.000251067
VPS4A	0	2	0.000247831
GALR2	0	2	0.000247709
UNG	0	2	0.000242248
PEF1	0	2	0.000238607
B4GALT1	0	2	0.000234797

## Sheet: Table 7
Supplementary Table 7: VIKOR Calculation Results for TSD, YJD, PQT, and LDH Targets
TSD-VIKOR		YJD-VIKOR		PQT-VIKOR		LDH-VIKOR
TSD-target		YJD-target		PQT-target		LDH-target
TP53	1	TP53	1	TP53	1	TP53	1
SRC	0.726071	PRKACA	0.761179	PRKACA	0.871929	STAT3	0.76126
STAT3	0.69471	SRC	0.70098	SRC	0.729428	AKT1	0.728588
HSP90AA1	0.693779	AKT1	0.697948	AKT1	0.713665	TNF	0.71497
AKT1	0.68833	HSP90AA1	0.666769	MAPK1	0.711325	IL6	0.707194
ESR1	0.653027	MAPK1	0.664497	HSP90AA1	0.696548	JUN	0.67559
PIK3CA	0.645361	MAPK3	0.655498	MAPK3	0.690353	FN1	0.654337
MAPK1	0.642136	ESR1	0.654663	ESR1	0.674482	ESR1	0.635726
MAPK3	0.630326	STAT3	0.642628	STAT3	0.654866	EGFR	0.610735
CTNNB1	0.620306	EP300	0.6367	PIK3CA	0.631694	MAPK3	0.566867
PIK3R1	0.619595	PIK3CA	0.625171	EP300	0.623739	CD44	0.557172
EGFR	0.612156	CTNNB1	0.622179	JUN	0.617545	NFKB1	0.554841
HSP90AB1	0.585912	PIK3R1	0.597088	PIK3R1	0.609325	PTGS2	0.551923
JUN	0.555513	EGFR	0.59289	EGFR	0.594501	IL1B	0.550487
PIK3CB	0.554662	JUN	0.585841	HSP90AB1	0.584615	CTNNB1	0.548586
PIK3CD	0.549602	HSP90AB1	0.575809	PTK2	0.573854	MAPK1	0.538666
BCL2	0.547111	HIF1A	0.549386	GRB2	0.560324	HDAC1	0.519788
HRAS	0.543355	PTK2	0.54716	MAPK8	0.556589	HSP90AB1	0.516164
PTK2	0.534562	PIK3CB	0.544438	HRAS	0.554275	CASP3	0.515693
CREBBP	0.518168	HDAC1	0.541923	PIK3CB	0.553277	MYC	0.515165
HIF1A	0.515368	PIK3CD	0.540721	AKT2	0.549695	BCL2	0.514063
CASP3	0.508235	MAPK8	0.53679	AKT3	0.549695	RELA	0.513479
AR	0.500959	RELA	0.525313	PIK3CD	0.549657	CREBBP	0.504428
HDAC1	0.500861	NFKB1	0.523101	RELA	0.549544	TRAF6	0.502694
PTPN11	0.498762	CREBBP	0.52301	HDAC1	0.541664	IFNG	0.501454
MAPK8	0.494548	BCL2	0.521063	BCL2	0.534301	RPS27A	0.497039
PTGS2	0.484862	AKT2	0.5194	PRKCA	0.533752	ERBB2	0.494013
STAT1	0.480183	CASP3	0.501253	HIF1A	0.533362	BRCA1	0.491474
ERBB2	0.473639	SIRT1	0.499943	FOXO1	0.532003	APRT	0.480875
ABL1	0.473427	AR	0.497838	GSK3B	0.526842	PIK3CA	0.480332
NCOR1	0.468425	GSK3B	0.494081	ITGB1	0.521307	AKT2	0.476799
PRKCA	0.468098	ITGB1	0.493932	CREBBP	0.513849	AKT3	0.476799
TNF	0.467768	APP	0.487571	APP	0.510041	FOS	0.472533
MAPK9	0.46738	IL6	0.487346	MAPK14	0.507377	CCND1	0.470389
CCND1	0.459958	MAPK9	0.486514	FOS	0.507115	PIK3R1	0.469109
GSK3B	0.459415	MAPK14	0.4858	MAPK9	0.506184	BCL2L1	0.465285
SIRT1	0.458895	PLCG1	0.484079	CASP3	0.506175	CXCL8	0.462744
ITGB1	0.457728	NCOR1	0.482371	AR	0.503018	MDM2	0.459973
MAPK14	0.45673	PTGS2	0.476609	RAF1	0.496033	MMP9	0.457513
FYN	0.454087	PTPN11	0.476173	MAPK13	0.495619	HIF1A	0.453797
MAPT	0.452221	STAT1	0.475943	MAPK11	0.495619	CASP8	0.448958
CDK1	0.450328	RAF1	0.475889	TNF	0.490881	PPARG	0.445469
MAPK11	0.446063	CCND1	0.475125	CDK1	0.484541	IL10	0.443093
CAMK2B	0.443736	MAPK13	0.472007	NCOR1	0.483655	IL1A	0.44207
IL6	0.443685	MAPK11	0.472007	PTGS2	0.48199	GSK3B	0.439436
JAK2	0.442094	ABL1	0.471234	JAK2	0.481086	CD8A	0.436341
MTOR	0.441977	GAPDH	0.470311	STAT1	0.475546	CCL5	0.431746
RAF1	0.441237	TNF	0.470291	PTPN11	0.474835	ACTB	0.430185
NR3C1	0.439634	PRKCA	0.46919	CCND1	0.472636	MAPK14	0.430118
BCL2L1	0.435462	MAPT	0.462052	PRKCB	0.47063	NFKBIA	0.429989
MDM2	0.433429	CDK1	0.459229	MAPT	0.469435	IGF1	0.429939
IGF1R	0.432207	PPARG	0.457399	GAPDH	0.468882	CDKN1A	0.428307
PRKCB	0.430229	JAK2	0.454787	IKBKB	0.468589	TGFB1	0.42747
LYN	0.429729	ERBB2	0.454249	ESR2	0.46445	FGF2	0.427306
JAK1	0.429054	HSPA8	0.453808	MTOR	0.463532	MAPK12	0.426231
PPARG	0.428463	CAMK2B	0.453451	ABL1	0.461387	ICAM1	0.424578
KDR	0.427504	FYN	0.447427	SIRT1	0.46119	CHUK	0.422346
PRKCD	0.423391	IGF1R	0.445174	IGF1R	0.459365	PIK3CB	0.41955
PGR	0.416114	MTOR	0.444497	FYN	0.45807	CDH1	0.412694
RXRA	0.415925	MDM2	0.444146	IL6	0.456717	PIK3CD	0.411893
IKBKB	0.414356	IKBKB	0.439173	ERBB2	0.456637	IKBKB	0.411773
ESR2	0.410779	EZH2	0.437828	EZH2	0.453537	IL4	0.410342
JAK3	0.407148	PRKCB	0.437695	MDM2	0.453479	CXCL1	0.410114
EZH2	0.406997	PGR	0.436224	HDAC2	0.452941	IRS1	0.407357
PTPN6	0.406471	CHUK	0.432757	CHUK	0.451831	RAF1	0.406376
PRKCG	0.406099	NR3C1	0.432404	PRKCG	0.448791	SIRT1	0.406165
CDK2	0.403965	ESR2	0.430877	BCL2L1	0.443322	CCL2	0.406161
PLK1	0.403028	BCL2L1	0.429644	CAMK2B	0.442635	MTOR	0.404438
NCOR2	0.401746	KDR	0.428972	PGR	0.442211	LYN	0.40343
CYP19A1	0.401436	HDAC2	0.428542	LYN	0.442207	IL2	0.402395
BRAF	0.396333	CDK2	0.426943	CDK2	0.439756	ALB	0.398199
HDAC2	0.393485	CDC42	0.426527	TLR4	0.436538	DCN	0.39609
CCNB1	0.390694	LYN	0.42304	CDC42	0.436012	YWHAZ	0.394926
CCNA2	0.389966	PRKCD	0.422257	RHOA	0.435461	IL17A	0.392379
MET	0.38624	PRKCG	0.418868	PPARG	0.434956	CDC42	0.391616
CDK5	0.385192	PKM	0.418782	NR3C1	0.43288	LEP	0.391412
KDM1A	0.384139	JAK1	0.417544	MAP3K7	0.43209	CCNA2	0.38965
APP	0.382666	RHOA	0.415842	CCNA2	0.430223	CEBPB	0.389481
FGFR1	0.382393	RXRA	0.415443	BRAF	0.428593	CAV1	0.388509
PPP2CA	0.382269	PPP2CA	0.415412	CALM1	0.428298	ARRB2	0.385734
RHOA	0.381886	PLK1	0.414614	PRKCD	0.427588	IL18	0.384915
SYK	0.381288	PRKCZ	0.41354	CDC25C	0.424025	XIAP	0.383322
PDGFRA	0.378588	NCOR2	0.412736	VAV1	0.421807	MMP2	0.380687
AURKB	0.376954	G6PD	0.411182	NOS1	0.420951	ITGAM	0.379044
G6PD	0.37657	CDC25C	0.410637	MAP2K1	0.4206	AURKA	0.378299
PDGFRB	0.375912	CCNA2	0.410269	PTPN6	0.420216	VCAM1	0.37691
IL1B	0.374232	SMARCA4	0.409384	PRKCZ	0.420146	NR3C1	0.376352
FGF2	0.371757	BRAF	0.409324	KDR	0.418003	CALM3	0.375809
PRKCE	0.369568	PTPN6	0.408013	CYP19A1	0.417676	MYD88	0.374588
BRD4	0.367918	STAT5B	0.406461	CXCL8	0.415745	CDKN2A	0.37421
LCK	0.367398	JAK3	0.405795	NFKBIA	0.412835	MET	0.374103
ITGB2	0.367167	MAP2K1	0.405784	RXRA	0.411481	LCK	0.373274
CDK4	0.366709	VAV1	0.405028	RPS6KB1	0.407574	CSF2	0.372762
PARP1	0.364896	PCNA	0.401498	PLK1	0.407394	TNFRSF1A	0.370613
PPARA	0.363906	KAT2B	0.400971	PPP2CA	0.405906	RIPK1	0.370542
KIT	0.36324	HTT	0.40071	KDM1A	0.402594	NFE2L2	0.369303
CYP3A4	0.362741	RPS6KB1	0.399658	NR4A1	0.401975	CDK2	0.368756
THRB	0.362034	PPARA	0.397575	JAK1	0.401749	CASP9	0.366791
PIK3CG	0.362028	CCNB1	0.394926	MAP2K2	0.399911	STAT5B	0.36387
RPS6KB1	0.360108	PSEN1	0.394112	NCOR2	0.39933	E2F1	0.362946
SREBF2	0.3599	IL1B	0.393992	TRPV1	0.399111	CYP2E1	0.362941
CDC25C	0.359894	CYP19A1	0.391835	CCNB1	0.397926	PRKCB	0.361555
MAP2K1	0.359171	BRD4	0.391677	PSEN1	0.397728	DNMT1	0.360848
CYP1A1	0.357789	CALM1	0.391573	ITGB2	0.396568	PPARGC1A	0.358336
PDPK1	0.357193	FGFR1	0.390979	YWHAG	0.396465	CDKN1B	0.358324
ALK	0.357159	CXCR4	0.390793	HSPA5	0.395078	RPS6KB1	0.358146
DNMT1	0.356953	KDM1A	0.390098	SMARCA4	0.394381	TNFRSF10B	0.354695
KNG1	0.353533	ENPP1	0.387912	PRKAA2	0.392966	FASLG	0.354125
TRPV1	0.352982	MAP2K2	0.387747	BAD	0.392157	CXCL10	0.354108
PTPN1	0.352773	NOS1	0.387736	IL1B	0.390892	NCF1	0.352266
IGFBP3	0.351115	NR4A1	0.387655	CACNA1C	0.389104	APP	0.35183
PSEN1	0.350358	ITGB2	0.386693	BRD4	0.389021	ITGB2	0.351698
MAP2K2	0.348794	CDK5	0.385145	JAK3	0.3889	ITGB3	0.351549
IL6ST	0.348064	FGF2	0.384896	MAP3K5	0.388284	IRF1	0.349183
PTK2B	0.34789	BAD	0.382679	PPARA	0.388082	CCNB1	0.348532
ICAM1	0.347876	MAP3K7	0.382138	CDK5	0.387761	CDK4	0.347674
CHEK1	0.34734	HSPA5	0.381909	KAT2B	0.386468	EGR1	0.34652
CALM1	0.347325	PRKCQ	0.381647	PDGFRB	0.38566	PRKCD	0.345647
FKBP5	0.3463	CASP8	0.379052	CASP9	0.385289	ATM	0.345212
MAP3K7	0.34621	ATM	0.378872	MAP2K4	0.384868	BAX	0.345122
ATM	0.345897	MET	0.378456	EZR	0.38392	NCF2	0.344511
SLC6A3	0.34504	DNMT1	0.37813	SYK	0.383534	VAV1	0.34386
MMP9	0.343895	PDPK1	0.375988	CYP1A2	0.38326	APAF1	0.343694
AHR	0.343718	EZR	0.373396	PDGFRA	0.382928	IL13	0.342325
ROCK1	0.343241	PDGFRB	0.373284	CXCR4	0.382488	CDC37	0.340832
PRKCQ	0.342329	MAP3K5	0.373284	ITGA2	0.381428	IL1R1	0.338635
AURKA	0.340553	ROCK1	0.372965	GRIN2A	0.381166	ITGA2B	0.33833
EZR	0.340078	AURKB	0.372897	PRKCE	0.381134	VCL	0.337856
PIK3C3	0.337868	CDK4	0.372592	CASP8	0.381123	IL6R	0.335877
TYK2	0.336613	ICAM1	0.372466	ATM	0.378795	PARP1	0.335172
PRKDC	0.336612	ITGA2	0.371236	PRKCQ	0.378515	CYBA	0.334473
IL2	0.332472	HSPB1	0.370204	PDPK1	0.378146	CYBB	0.334473
ROCK2	0.331729	TRPV1	0.369888	AURKB	0.377704	HSPA5	0.333883
MMP2	0.33167	SYK	0.369667	SLC9A1	0.375596	IL7	0.333771
CCNE1	0.330095	CYP1A2	0.369204	GSTP1	0.375297	ILK	0.333525
CCNA1	0.329763	PDGFRA	0.36918	CYP3A4	0.374898	BIRC5	0.333518
MCL1	0.329693	PIK3CG	0.368836	MET	0.374524	EZR	0.331337
TBK1	0.329638	PARP1	0.368595	KIT	0.374394	MCL1	0.33117
ITK	0.329358	GSTP1	0.368029	MAP2K7	0.374265	CYP2C9	0.330445
ACE2	0.328371	SLC9A1	0.367954	PIK3CG	0.37417	TERT	0.330335
GSK3A	0.327501	GRIN2A	0.367736	SPHK2	0.373846	STAT6	0.32952
INSR	0.326947	SREBF2	0.366149	PARP1	0.373433	IL6ST	0.329088
CYP2C9	0.32686	KAT2A	0.36555	NOS3	0.373337	TYK2	0.327795
HDAC6	0.326417	PRKCE	0.365023	FGFR1	0.370481	IL5	0.327631
NR4A1	0.326272	MAP2K4	0.361686	LCK	0.370416	DDX5	0.327504
THRA	0.325663	RIPK1	0.361646	PRNP	0.369423	S100B	0.327246
NTRK2	0.324495	ERBB4	0.360883	CDK4	0.369368	TIMP1	0.326213
TGFBR2	0.324128	ROCK2	0.360599	CYP1A1	0.369245	CD74	0.325899
LRRK2	0.322999	TGFB1	0.360276	PKM	0.369213	NOS2	0.325832
ITGA4	0.3219	THRB	0.359322	DNMT1	0.368603	IL23R	0.325593
ITGA2	0.320471	MAP2K3	0.359292	CHEK1	0.367832	IL2RG	0.325405
NOS2	0.320013	TERT	0.359289	CFTR	0.365076	HSPB1	0.32514
CDC25A	0.31755	CYP3A4	0.359178	SREBF2	0.364959	SPP1	0.325003
PDE3B	0.317539	CHEK1	0.358781	FGF2	0.364378	HGF	0.324999
STAT6	0.316807	LCK	0.358776	G6PD	0.364189	HMGB1	0.324634
CYP2C19	0.316304	CHEK2	0.358711	XIAP	0.364169	CAPN2	0.324446
CDC25B	0.315765	YWHAG	0.358619	CHEK2	0.362744	CAPN1	0.324446
LGALS3	0.314735	KNG1	0.358592	CACNA1S	0.361814	GUK1	0.324205
PPP1CC	0.311856	MMP9	0.357426	ERBB4	0.360944	CASP1	0.32338
NTRK1	0.310069	IGFBP3	0.356964	SLC6A3	0.360631	CCL11	0.322747
SIRT2	0.30996	DPP4	0.355572	KNG1	0.360411	GSTP1	0.321817
HCK	0.309793	CYP1A1	0.354012	PTK2B	0.360226	NLRP3	0.320408
PTK6	0.309487	FKBP4	0.353312	ILK	0.36013	CCL4	0.320025
SLC2A2	0.308944	KIT	0.353171	HSP90B1	0.359745	BAD	0.319883
PLA2G4A	0.307925	SIRT2	0.353147	GRIN2B	0.359323	NOS3	0.319511
ITGAV	0.307909	PTPN1	0.352756	MAP2K3	0.358797	ATF4	0.318348
BTK	0.307336	FKBP5	0.352663	MAP2K6	0.357889	NGFR	0.317586
VCAM1	0.307187	TBK1	0.352633	ICAM1	0.356726	CSNK2A1	0.316999
CAPN1	0.306516	GRIA1	0.352503	THRB	0.356517	BRD4	0.316693
CAPN2	0.306516	GRIN2B	0.352124	TBK1	0.354382	CCL3	0.316581
CD38	0.303814	GSK3A	0.352008	SPHK1	0.354351	IFNA1	0.316311
TOP1	0.303645	PPP1CC	0.351434	IGFBP3	0.353663	PIK3CG	0.31596
CSK	0.301915	SPHK2	0.351255	HDAC4	0.353237	PXN	0.315129
MAP3K5	0.301383	HDAC6	0.350281	FKBP5	0.353161	CALM1	0.315
CTSB	0.300671	SLC6A3	0.349105	ITGB3	0.352558	FAS	0.314869
APEX1	0.300139	HDAC4	0.348821	GRIA1	0.350561	ITGA2	0.314016
PER2	0.300103	PTK2B	0.348611	AHR	0.349915	CD36	0.313903
FLT1	0.299308	STAT6	0.348342	GYS1	0.349684	LEPR	0.313668
AKR1C3	0.299162	ZAP70	0.34809	CSNK1E	0.349066	APOE	0.313364
PNP	0.297634	XIAP	0.347295	MMP9	0.348838	YAP1	0.312979
KCNH2	0.295399	PRKDC	0.346778	HDAC6	0.348216	HBEGF	0.312769
HDAC3	0.295155	ACE2	0.346331	PTPN1	0.347998	TGFBR2	0.312015
GRIN2B	0.294526	AURKA	0.34511	ROCK1	0.347382	RB1	0.311864
VCP	0.293171	CFTR	0.344799	ITK	0.346966	FGFR1	0.311106
PPP5C	0.293159	CSNK1A1	0.344708	DPP4	0.346938	BAK1	0.310993
CTSS	0.29193	IL6ST	0.343646	ACE2	0.346515	IL2RA	0.310872
ADK	0.287686	ITGB3	0.343228	PRKDC	0.346458	SELP	0.310161
EGLN1	0.286809	ALK	0.342857	IL6ST	0.346418	CRP	0.30973
CFTR	0.286078	NTRK2	0.342227	SNCA	0.346398	IL7R	0.309091
KLK2	0.285175	PNP	0.341973	TERT	0.34509	XRCC6	0.308456
TGFBR1	0.284701	AHR	0.341837	ITGA4	0.344865	COL1A2	0.308063
CCNB2	0.283172	SPHK1	0.341641	ZAP70	0.344658	LIF	0.308057
DAPK1	0.282417	TGFBR2	0.339907	MAP3K1	0.342599	NQO1	0.307181
IRAK4	0.280577	SNCA	0.339761	INSR	0.342555	TNFSF10	0.307152
PPP1CA	0.279558	HDAC3	0.339482	CSNK2A1	0.342213	SELL	0.30682
ALOX5	0.278709	NLRP3	0.33938	PRMT1	0.341995	CCNE1	0.306
CTSL	0.277401	ITGA4	0.339361	CCNA1	0.341799	BBC3	0.305389
EPAS1	0.277394	ITK	0.339101	PRKAG1	0.341566	APOA1	0.30529
ERBB4	0.276196	HSP90B1	0.339042	PRKAB1	0.341566	CD40LG	0.303784
DRD2	0.275333	PLA2G4A	0.338991	AURKA	0.340773	G6PD	0.3036
UGT2B7	0.274079	TYK2	0.338821	CDC25B	0.340678	SUMO1	0.302935
CDK6	0.273987	CD38	0.337616	BTK	0.340666	CYP1A1	0.302709
WNT3A	0.273854	CYP2C9	0.337387	ALK	0.340596	YWHAE	0.302605
SNCA	0.273722	ITGAV	0.336154	NOS2	0.340166	COL1A1	0.302525
PTGS1	0.270471	PDE3B	0.336057	ELAVL1	0.339762	PMAIP1	0.302284
TOP2A	0.270194	MCL1	0.334283	BIRC2	0.339658	AHR	0.3015
CASP7	0.269394	ALB	0.333788	LGALS3	0.339134	CHEK2	0.300723
EPHA2	0.266815	APEX1	0.332975	ITGA5	0.338511	TNFRSF10A	0.300579
TRPV4	0.266363	CCNE1	0.332739	ITGB7	0.33763	GP6	0.300372
ALOX15	0.265386	ITGB7	0.332662	USP7	0.337568	TFAM	0.298413
NR3C2	0.264962	GYS1	0.331975	ITGB5	0.335701	NCOR2	0.29813
HDAC7	0.263194	IL2	0.331576	SMO	0.335367	PPARA	0.296877
ATIC	0.261478	MMP2	0.331154	ROCK2	0.335048	CD274	0.295806
COMT	0.261222	VCAM1	0.330946	CDC25A	0.335026	GP1BA	0.294715
GRM1	0.26059	CDC25B	0.3304	ITGAV	0.335008	VDAC1	0.294338
LDHA	0.259445	LRRK2	0.329977	HDAC3	0.334906	FOSB	0.294201
CYP11B2	0.258773	ITGB5	0.329955	CSNK1D	0.334415	DDIT3	0.293475
GRM5	0.25205	EHMT2	0.329912	APEX1	0.334325	IL4R	0.293053
CDK5R1	0.251775	NOS2	0.329626	CYP2C9	0.33432	CDH2	0.292974
ERN1	0.251645	PAK1	0.329176	PTPRC	0.334303	CASP6	0.292789
CYP17A1	0.251395	PLG	0.328774	PDE3B	0.333953	CTSB	0.292514
HSD17B2	0.251395	GRIA2	0.32858	PLG	0.333615	GDNF	0.292303
ABCC1	0.24994	CCNA1	0.328566	SIRT2	0.332859	IRF9	0.292159
ABCG2	0.24994	VCP	0.328429	GSK3A	0.332633	CYP2B6	0.291236
AVPR1A	0.24994	PIK3C3	0.328306	NLRP3	0.332407	MAP2K1	0.291131
AVPR2	0.24994	CDC25A	0.327986	GRIA2	0.331891	EIF4EBP1	0.28983
C3AR1	0.24994	INSR	0.327426	VCAM1	0.331885	BCL2L11	0.287785
C5AR1	0.24994	MALT1	0.326959	LRRK2	0.331464	TRIM21	0.287316
DAO	0.24994	IRAK1	0.326339	RIPK2	0.331122	HCK	0.287043
HAO1	0.24994	PRKG2	0.32624	HCK	0.330914	ATR	0.286185
FTO	0.24994	CYP2C19	0.325659	KEAP1	0.330759	THBS1	0.286002
MC4R	0.24994	BTK	0.325622	CCNE1	0.330478	CSF3R	0.285765
GLRA1	0.24994	PPP1CA	0.325548	KCNJ6	0.330124	CYP1A2	0.285407
SLC6A5	0.24994	PLK3	0.32537	PPP1CA	0.330094	EHMT2	0.285075
GRIK1	0.24994	MAP3K1	0.324853	RAD51	0.32935	RPS6	0.284312
GRIK2	0.24994	LDHA	0.324786	CSNK2A2	0.328897	FGA	0.284255
HCRTR1	0.24994	ITGA2B	0.324161	BIRC3	0.328136	BID	0.283827
HCRTR2	0.24994	FGFR2	0.323907	MALT1	0.328077	SPARC	0.283611
HTR6	0.24994	THRA	0.323193	CSNK1A1	0.327838	PRKCE	0.282836
HTR7	0.24994	MAP3K8	0.321797	MCL1	0.326538	HMMR	0.28081
MTNR1A	0.24994	LGALS3	0.321704	PNP	0.326355	CASP7	0.279763
MTNR1B	0.24994	CSNK1D	0.321558	FGFR3	0.32564	PMS2	0.279375
P2RX3	0.24994	HPRT1	0.320989	ITGA2B	0.325244	FBN1	0.278837
P2RX7	0.24994	SMO	0.320618	MAP3K8	0.325029	CXCR3	0.277358
PIM1	0.24994	FGFR3	0.320157	SCN5A	0.324676	SLC2A1	0.276896
PIM2	0.24994	NTRK1	0.319959	ADRB2	0.324501	HDAC4	0.276866
PYGL	0.24994	HCK	0.319449	MMP2	0.324174	MAP2K2	0.276509
PYGM	0.24994	PTK6	0.318803	NTRK2	0.323905	IL12RB2	0.276466
SAE1	0.24994	LIPE	0.318157	KDM3A	0.322189	THRB	0.275718
UBA2	0.24994	SLC2A1	0.317477	PLK3	0.321906	CX3CL1	0.275357
SERPINA6	0.24994	SLC2A2	0.31591	EHMT2	0.321852	PRL	0.275356
SHBG	0.24994	PIP5K1C	0.314901	CYP2C19	0.320854	BDNF	0.275099
RXRG	0.249253	ADCY5	0.313994	VCP	0.3204	SOCS2	0.274423
CSNK1D	0.247577	ATR	0.312815	LIPE	0.319672	PINK1	0.274271
SCN5A	0.246214	GLI1	0.311024	FLT1	0.319075	ACAN	0.273934
CASP6	0.246067	TOP1	0.310787	PTK6	0.31901	BMP2	0.273865
HTR1A	0.245819	CAPN1	0.310631	IL2	0.318955	DLG4	0.272402
PARP2	0.245744	CAPN2	0.310631	PLA2G4A	0.318336	PECAM1	0.272321
SCARB1	0.243303	KCNJ6	0.310329	CASP7	0.318222	CDC25A	0.272318
CBR1	0.242683	NQO1	0.309865	HNF4A	0.317003	CYP3A4	0.27216
GLI2	0.242459	SCN5A	0.309786	CYP2A6	0.316825	FGG	0.272125
SMO	0.242187	CYP2A6	0.309688	THRA	0.314923	TLR3	0.27123
PTGES	0.241996	CTSB	0.30935	ATR	0.314234	CYP4A11	0.271064
REN	0.241661	AKR1C3	0.309138	TH	0.313965	TGFA	0.27058
CASP1	0.241624	PER2	0.308588	NTRK1	0.313899	IL1RN	0.270554
SELL	0.241382	PDE3A	0.30825	CAMK4	0.313577	FCER1G	0.270026
ADORA2A	0.240939	FLT1	0.308185	CD38	0.313428	COL3A1	0.269992
SGK1	0.240411	CSK	0.308058	GLI1	0.312737	PHB2	0.269913
PKN1	0.23918	TNNI3	0.307905	MKNK1	0.311296	HDAC3	0.269025
RARA	0.238813	EPAS1	0.307822	ITGAL	0.310527	GSR	0.268528
NTRK3	0.238115	HDAC7	0.307227	TOP1	0.310347	ITGA5	0.268148
MAOB	0.23746	GLI2	0.306741	GLI2	0.309442	PRNP	0.267879
PPARD	0.234456	TGFBR1	0.306704	RBBP4	0.308933	MMP3	0.267383
CYP11B1	0.233156	RORA	0.306015	PDE3A	0.308774	HPGDS	0.267132
FKBP1A	0.232041	CCND2	0.305321	CCNB2	0.307374	SNCA	0.267064
MAOA	0.231212	PRKCI	0.304975	AKR1C3	0.307076	HCLS1	0.266891
HSD17B1	0.230273	MKNK1	0.303603	ADCY1	0.306766	EEF1A1	0.265751
HSD17B3	0.230128	CCND3	0.303313	RORA	0.305804	CCND3	0.265436
GCK	0.229547	ADCY1	0.302968	CSK	0.304685	PLA2G4A	0.263874
NR1H4	0.22929	CASP7	0.302399	CAPN1	0.304235	TCF4	0.263313
NR1H3	0.229087	CCNB2	0.301166	CAPN2	0.304235	CYP2C19	0.262924
HK2	0.228474	HDAC9	0.299772	CTSB	0.303331	GJA1	0.262385
TRPA1	0.2283	KCNH2	0.298888	HPRT1	0.303264	IL2RB	0.262327
SLC2A1	0.22752	ADRB2	0.297109	DAPK1	0.302983	SCARB1	0.261231
MPO	0.226558	TKT	0.296855	PER2	0.302138	CXCL9	0.261195
FGF1	0.225548	RPS6KA5	0.296804	TNNI3	0.302023	LCN2	0.261021
PSEN2	0.223384	ITGAL	0.29646	LDHA	0.301926	PDGFB	0.260764
NR1I2	0.222345	PIP4K2C	0.296216	HPGDS	0.301319	SOD1	0.260298
NR1I3	0.222345	EGLN1	0.296026	KCNH2	0.301118	CSF1	0.260138
HK1	0.220079	HPGDS	0.295887	PRKCI	0.300815	ELN	0.260039
TLR9	0.219771	DAPK1	0.295555	ERN1	0.299797	DLG1	0.260027
FABP4	0.219457	PPP2R5A	0.293946	NQO1	0.29963	MMP14	0.259886
CPT1A	0.218945	ADK	0.293756	KCNJ3	0.299589	POMC	0.258414
ADCY1	0.217277	GRM5	0.293144	KCNJ5	0.299589	BGLAP	0.258331
BACE2	0.217165	IRAK4	0.292978	MAPKAPK2	0.299122	CTSL	0.258005
MYLK	0.217025	ADORA2A	0.292516	IRAK4	0.299113	ITGB4	0.257685
EPHX1	0.216826	DRD2	0.292046	EPAS1	0.298583	FGB	0.25762
AGTR1	0.216818	CDK6	0.290834	MYLK	0.298579	H2AX	0.25621
ANPEP	0.215775	WDR5	0.290413	GRM5	0.297943	FGF9	0.256196
KCNJ6	0.214449	MYLK	0.290169	RPS6KA5	0.297836	CFLAR	0.25502
DHCR7	0.212178	TOP2A	0.289901	ABCC8	0.297691	COMP	0.254015
CYP51A1	0.212127	ALOX5	0.289782	CCND3	0.297245	F2	0.253947
APH1A	0.211578	ERN1	0.289573	ADK	0.297169	GSN	0.253417
NCSTN	0.211578	DNMT3B	0.288976	HDAC7	0.296831	PTGS1	0.252702
PSENEN	0.211578	XDH	0.288798	CCND2	0.295845	PF4	0.251962
CYP1B1	0.211523	NOX1	0.28858	RBBP7	0.29546	SDC4	0.251746
HMGCR	0.210935	PDE4D	0.288526	TOP2A	0.295272	TNFAIP6	0.251694
GSR	0.210261	PDE4A	0.288526	FLT4	0.295085	BIN1	0.250361
G6PC	0.210241	PTGS1	0.287391	EPHA2	0.29434	ASIC1	0.249954
CD81	0.21001	KLK2	0.286313	EGLN1	0.294217	ASIC2	0.249954
SLC6A4	0.210006	EIF2AK3	0.28504	KISS1R	0.292402	CHRNA3	0.249954
TRPM8	0.208441	CTSS	0.284634	EIF2AK3	0.291985	CHRNA5	0.249954
PTPN22	0.208098	KCNJ3	0.284218	KCNE1	0.291043	HDC	0.249954
RORA	0.206275	KCNJ5	0.284218	KCNQ1	0.291043	HNMT	0.249954
AKR1C1	0.206052	UGT2B7	0.283898	CSNK1G2	0.290223	IL20	0.249954
GBA	0.205341	KCNE1	0.283811	CSNK1G3	0.290223	IL24	0.249954
DHFR	0.205236	KCNQ1	0.283811	XDH	0.289508	KCNK10	0.249954
BACE1	0.205028	CSNK1G2	0.283796	HDAC9	0.288993	KCNK2	0.249954
GSTM1	0.204182	NAMPT	0.281369	CASP1	0.28824	NAA15	0.249954
GSTA1	0.204182	FLT4	0.280891	PDE4D	0.287889	NAA38	0.249954
RORC	0.203271	GCG	0.280617	PDE4A	0.287889	RPN1	0.249954
DRD4	0.202752	TYMS	0.280358	KLK2	0.28761	SSR3	0.249954
IKBKE	0.202678	KISS1R	0.279525	PIP4K2C	0.287578	SCN1B	0.249954
ACHE	0.202351	CASP1	0.279404	PRKD3	0.287445	SCN9A	0.249954
AKR1B1	0.201436	CASP6	0.278124	PRKD1	0.287445	SLC22A7	0.249954
CCNT1	0.200543	ALOX15	0.278123	ADCY10	0.286329	SLC22A8	0.249954
CYP26A1	0.199168	PRKD1	0.277546	TKT	0.286306	SULT1A1	0.249954
FABP1	0.196828	PSEN2	0.276928	SUZ12	0.285987	SULT1A3	0.249954
HSD11B1	0.193321	EPHA2	0.276234	NR5A1	0.285903	TNFRSF18	0.249954
CNR1	0.19252	KCNMA1	0.275996	TRPV4	0.285132	TNFSF18	0.249954
MMP1	0.190472	CYP1B1	0.275955	TGFBR1	0.283055	IBSP	0.249094
SORT1	0.187543	NR3C2	0.275012	MYLK2	0.282755	TNFSF11	0.247545
EPHX2	0.187525	PLK4	0.274961	CDK6	0.282511	MMP7	0.246665
IDE	0.185605	TRPV4	0.274853	CASP6	0.281626	IL15	0.245824
ARG1	0.184305	GRIN1	0.274779	SGK1	0.280462	HSF1	0.245787
CXCR2	0.183153	CTSL	0.274186	CYP1B1	0.279563	KNG1	0.245621
ACE	0.182395	KIF11	0.27265	PSEN2	0.279523	PRKN	0.245281
CHRM1	0.181856	COMT	0.27189	DRD2	0.279321	FMOD	0.244995
HSD11B2	0.181336	EIF4E	0.2703	CDC45	0.277599	CYP1B1	0.244515
PTPRF	0.181171	PKN1	0.269697	GRIN1	0.276967	MPO	0.2443
CES1	0.178232	CDK5R1	0.269367	ALOX5	0.276822	SOX9	0.244058
AKR1B10	0.177835	GRM1	0.268803	HMGCR	0.276739	CD151	0.243446
IDO1	0.176344	CYP17A1	0.26833	PLD1	0.276723	DNMT3A	0.242321
RORB	0.174132	CDK7	0.268277	PLD2	0.276723	VCAN	0.241137
TTR	0.17322	PAK4	0.266984	PTGS1	0.27583	PTK2B	0.240718
FPR2	0.17322	FKBP1A	0.266754	CTSS	0.275783	MYOD1	0.24012
KIF11	0.169499	EPHX1	0.266314	XBP1	0.275736	THBS2	0.239896
CHRM3	0.168725	ADA	0.266044	CACNA1H	0.275334	WNT1	0.239766
ITGAL	0.167389	PI4KB	0.26508	UGT2B7	0.274346	CKS1B	0.239184
GABBR1	0.167183	ATIC	0.264531	EED	0.273451	CCL19	0.238553
TYMS	0.167181	F2	0.264299	SCARB1	0.273115	SLC2A4	0.237948
MME	0.165285	CYP11B2	0.264259	HSD3B1	0.273092	DNM1L	0.237257
TERT	0.164265	FABP4	0.262688	HSD3B2	0.273092	SPTAN1	0.237093
CPA1	0.163737	PARP2	0.261534	NR0B2	0.272888	PHB	0.23624
PTGER4	0.163737	RXRG	0.261316	RXRB	0.271531	AGT	0.23619
HTR2A	0.163339	APH1A	0.260634	PAK4	0.271339	NOTCH3	0.235346
ACACB	0.161875	NCSTN	0.260634	FKBP1A	0.270663	YWHAQ	0.234726
AOC3	0.160186	PSENEN	0.260634	KIF11	0.269989	NLRX1	0.233596
PRCP	0.159841	FGF1	0.25971	PKN1	0.26997	CCR3	0.232787
GART	0.158625	ADAM10	0.259207	ALOX15	0.269609	RPS16	0.231927
AMPD3	0.157359	BACE1	0.258564	SELL	0.268815	RPS19	0.231927
AMPD1	0.157359	WNT3A	0.258067	PLK4	0.268131	PF4V1	0.231247
AMPD2	0.157359	MGLL	0.256861	CDK5R1	0.267189	GSTM1	0.230537
ATP12A	0.157167	SELL	0.256135	DHCR7	0.26661	IDO1	0.2305
ATP4A	0.157167	HSD17B2	0.255407	PAK3	0.266339	COL2A1	0.230261
ALDH2	0.156687	GSR	0.255062	F11	0.266304	RPL34	0.228744
NPC1L1	0.152346	INCENP	0.254523	ADORA2A	0.266087	PSMC6	0.225831
CES2	0.15177	PTGES	0.254299	CYP17A1	0.266071	BNIP3L	0.225669
SORD	0.149582	HTR1A	0.253221	DNMT3A	0.266038	GZMA	0.223988
OPRD1	0.147775	CNR1	0.252649	COMT	0.265622	TBL1X	0.223546
EDNRA	0.146844	HK2	0.252007	CAMK2G	0.264478	B2M	0.223223
EDNRB	0.146844	SELP	0.251792	TRPC3	0.263885	GHR	0.22222
GUSB	0.145459	F11	0.251779	EPHX1	0.263514	SFPQ	0.221397
CHRM2	0.14374	GCK	0.250743	CYP11B2	0.263313	TGFB3	0.220839
GRM4	0.13765	REN	0.250325	WNT3A	0.262391	RAC1	0.220745
F2	0.137243	ABCC1	0.249958	GRK2	0.261788	TIMP3	0.220359
BDKRB1	0.136526	ABCG2	0.249958	APH1A	0.261386	DLGAP5	0.220159
GALR1	0.131409	AVPR1A	0.249958	NCSTN	0.261386	SMURF2	0.218437
ADRA1A	0.128784	AVPR2	0.249958	PSENEN	0.261386	COL9A1	0.217697
ADRA1B	0.128784	C3AR1	0.249958	ADAM10	0.26127	IGF2	0.217338
ADRA1D	0.128784	C5AR1	0.249958	HSD17B2	0.259824	POLR2A	0.216907
FDFT1	0.128172	DAO	0.249958	ACHE	0.259646	ACACA	0.216387
AKR1A1	0.128011	HAO1	0.249958	CCNH	0.25938	CTSG	0.216288
CCR2	0.123046	FTO	0.249958	CDK7	0.259355	UBE2K	0.215529
CXCR1	0.123046	MC4R	0.249958	NR3C2	0.258972	MAPKAPK3	0.214665
PTPN2	0.122366	GLRA1	0.249958	PARP2	0.257816	LAMC2	0.214011
SQLE	0.119351	SLC6A5	0.249958	BACE1	0.257805	PRKAA1	0.213982
PDE2A	0.116813	GRIK1	0.249958	NAMPT	0.257337	COL4A2	0.213128
CPT1B	0.113269	GRIK2	0.249958	GRM1	0.257002	PIK3C2A	0.21263
CDK8	0.111255	GRK1	0.249958	HSD17B7	0.255192	IQGAP2	0.212341
HTR2C	0.108462	GRK7	0.249958	ATIC	0.255166	PFN1	0.211327
SERPINE1	0.105225	HCRTR1	0.249958	CASP2	0.254136	CAPZA1	0.210191
F2R	0.0978075	HCRTR2	0.249958	F2	0.253778	AGTR1	0.210133
GRM2	0.0970258	HEXA	0.249958	INCENP	0.251988	NME6	0.207277
GABRA1	0.0909621	HEXB	0.249958	TRPA1	0.250595	HMOX1	0.206448
GABRB2	0.0909621	KCNK3	0.249958	ABCC1	0.249964	NEFL	0.206273
GABRB3	0.0909621	KCNK9	0.249958	ABCG2	0.249964	NPY	0.206112
GABRG2	0.0909621	PIM1	0.249958	AVPR1A	0.249964	ANPEP	0.205354
DNMT3B	0.0895041	PIM2	0.249958	AVPR2	0.249964	CD24	0.204442
CSNK2A1	0.088476	SAE1	0.249958	C3AR1	0.249964	PICALM	0.203461
MKNK1	0.08614	UBA2	0.249958	C5AR1	0.249964	TRPV1	0.202238
CTRC	0.0832716	IDE	0.249881	CLK1	0.249964	GSTT2B	0.198226
CTRB1	0.0832716	SCARB1	0.249779	CLK4	0.249964	STAMBP	0.196173
PTGER1	0.0832716	SMARCA2	0.249612	FFAR1	0.249964	COL9A2	0.194992
PTGER2	0.0832716	TRPA1	0.249156	FFAR4	0.249964	COL9A3	0.194992
OPRM1	0.0832339	NR1H4	0.248657	FTO	0.249964	THBS4	0.194953
FLT3	0.075705	ACHE	0.248052	MC4R	0.249964	F2R	0.194831
ACLY	0.0749474	RARA	0.247841	GLRA1	0.249964	PPP1R15A	0.193823
ACACA	0.0727552	MAOB	0.247643	SLC6A5	0.249964	ACE	0.192876
FASN	0.0727552	SRD5A1	0.246781	GRIK1	0.249964	SERPINA3	0.191693
YES1	0.0697869	SRD5A2	0.246781	GRIK2	0.249964	UBE2B	0.191314
KCNJ1	0.063489	PABPC1	0.246752	HCRTR1	0.249964	TACC3	0.188907
FLT4	0.061475	HK1	0.245964	HCRTR2	0.249964	OPRM1	0.188717
CDK9	0.0601635	SGK1	0.245864	HTR3A	0.249964	TUBA1A	0.188701
FNTA	0.0558632	PPARD	0.245469	HTR3B	0.249964	CD79A	0.188694
PLG	0.0476618	TTR	0.244911	HTR6	0.249964	IL23A	0.188158
KDM4C	0.0457008	CYP11B1	0.244733	HTR7	0.249964	MCM5	0.187357
FGR	0.0433888	CBR1	0.24442	KCNK3	0.249964	MFN1	0.187244
WEE1	0.0422136	ME1	0.244157	KCNK9	0.249964	SERPINA1	0.185526
CCR1	0.0388782	GRK2	0.243868	MAN1B1	0.249964	HNRNPA1	0.185249
CCR3	0.0388782	PGF	0.243531	MAN2A1	0.249964	EDNRB	0.184233
AKR1C4	0.0359485	CPT1A	0.242648	METAP1	0.249964	VKORC1	0.182785
CCNE2	0.0347039	ANPEP	0.242582	METAP2	0.249964	NGF	0.182591
POLB	0.0252123	AMPD1	0.242112	MT-ND4	0.249964	GSTO1	0.182016
BRD2	0.0252107	AMPD2	0.242112	UQCRB	0.249964	IL17RA	0.180151
CCNB3	0.0247136	AMPD3	0.242112	MTNR1A	0.249964	KCNQ1	0.179858
FBP1	0.0232124	HSD17B3	0.241646	MTNR1B	0.249964	PLA2G6	0.178699
MPI	0.0232124	FEN1	0.241635	PIM1	0.249964	GFAP	0.178573
NEK2	0.0231216	NR1D1	0.241165	PIM2	0.249964	MS4A2	0.178375
MIF	0.0226649	NR1H3	0.241029	PRSS1	0.249964	NKG7	0.178288
AXL	0.0194576	ADAM17	0.24076	PRSS3	0.249964	HNRNPC	0.178054
ALOX12	0.0192812	DHCR7	0.239612	SAE1	0.249964	AP2B1	0.175412
TTK	0.0192758	MAOA	0.239256	UBA2	0.249964	NAT2	0.174636
TXK	0.0154428	CD81	0.239247	SERPINA6	0.249964	NAT1	0.174636
SELP	0.0154277	MPO	0.239078	SHBG	0.249964	TOMM20	0.174021
SELE	0.0154277	DHFR	0.23879	SLC22A2	0.249964	GNLY	0.173779
APH1B	0.0154225	NR1I2	0.235824	SLC47A1	0.249964	SOD2	0.173618
IMPDH2	0.0154101	NR1I3	0.235824	SLC27A1	0.249964	AKR1C3	0.173203
IMPDH1	0.0154101	G6PC	0.23537	SLC27A4	0.249964	CES1	0.172918
RPS6KA5	0.0134393	CDK3	0.233657	ADA	0.24936	GAP43	0.172599
CTSD	0.0115971	ACE	0.23344	SELP	0.248529	UGT1A6	0.172039
NAMPT	0.0115919	HSD17B1	0.233074	GCK	0.248432	UGT1A1	0.172039
RARG	0.0115795	TRPM8	0.232999	ANPEP	0.248224	UGT1A10	0.172039
RARB	0.0115795	CYP2D6	0.232289	CNR1	0.248025	UGT1A7	0.172039
CYP26B1	0.0115786	F3	0.232236	FABP4	0.247873	UGT1A8	0.172039
STS	0.0115751	FABP1	0.23075	LIMK1	0.247567	RANBP2	0.171833
AGTR2	0.0115731	BACE2	0.230518	TLR9	0.247355	MCM6	0.168651
MAPKAPK2	0.00959475	UQCRB	0.229198	PTGES2	0.247261	TYR	0.168133
MDM4	0.00776019	BRD9	0.229036	PTGES	0.247261	COMT	0.166596
RPS6KA3	0.00775644	FPR2	0.228644	NR1H4	0.247209	COL5A2	0.166084
RPS6KA2	0.00775644	CCNT1	0.22854	RXRG	0.246424	GSTA1	0.165137
DAPK3	0.00775347	ARG1	0.227945	CYP51A1	0.246043	GSTA2	0.165137
MKNK2	0.00775322	KDM4C	0.227261	HDAC5	0.24475	UGT1A3	0.16506
CTSK	0.00775003	GSTM2	0.226761	CTSL	0.244243	PLD2	0.164841
NR1H2	0.00773422	GSTM1	0.226761	TYR	0.244161	IL12B	0.164784
KCNE1	0.00773293	CDC7	0.226518	GSR	0.24404	CANX	0.16378
KCNQ1	0.00773293	CYP51A1	0.226043	REN	0.24371	SERPINB2	0.163065
LGMN	0.00772959	AKR1B1	0.225937	SRD5A1	0.243625	WBP2	0.162957
GLI1	0.00772697	PYGM	0.225227	SRD5A2	0.243625	GSTM3	0.16214
SHH	0.00772697	PYGL	0.225227	ERCC5	0.243575	AKR1C1	0.161569
AKR1C2	0.00772297	CDK9	0.225096	CYP11B1	0.243098	CX3CR1	0.160341
KCNJ3	0.00771862	LIMK2	0.224552	TYK2	0.243096	FPR2	0.159741
KCNJ5	0.00771862	GSTA1	0.223887	ACACB	0.242058	GGT1	0.159543
PFKFB3	0.00771627	AGTR1	0.223824	CCR2	0.242054	G6PC3	0.158012
CDC7	0.00738619	CYP26A1	0.223065	MAOB	0.241939	HLA-DRB1	0.157281
BCL2A1	0.0039099	TYMP	0.222994	CCNE2	0.241042	UGT2B7	0.157096
HSPA1A	0.0039099	CHRNA4	0.222965	CXCR2	0.241036	TNFRSF11B	0.156895
WNT3	0.00390637	CHRNB2	0.222965	RARA	0.240888	PDCD10	0.156212
PI4KB	0.00390522	AKR1C1	0.22291	ARG1	0.240262	COL11A1	0.156077
CTSH	0.00390468	PTPN22	0.222038	HSD17B3	0.240122	ODC1	0.1551
CTSV	0.00390468	ATP1A1	0.221365	ADAM17	0.239994	PPIG	0.154198
CA9	0.00390188	SIGMAR1	0.221169	PPP5C	0.239413	POR	0.153041
PARP3	0.00389976	SLC6A4	0.220848	AKR1B1	0.239394	UQCRC2	0.152991
KDM5B	0.00389976	SIRT3	0.220808	PPARD	0.238587	UBA2	0.152265
PLA2G2A	0.00389814	CDA	0.22032	MPO	0.238291	LMNA	0.149949
EPHA1	0.00389619	HMGCR	0.218737	DHFR	0.238136	REN	0.149588
EPHA4	0.00389522	RORC	0.218291	NR1H3	0.238059	ALDH1A1	0.147915
EPHB2	0.00389522	CXCR2	0.218161	CD81	0.237848	COL11A2	0.143923
BRD3	0.00388913	GBA	0.21717	IDE	0.237295	GFRA3	0.143664
LIMK2	0.00388881	CACNA1B	0.216099	MGLL	0.237006	OPRD1	0.141975
ELANE	0.00388827	GABBR1	0.215959	CBR1	0.236792	FBN2	0.139967
CAPNS1	0.00388647	MME	0.215916	FEN1	0.236272	ADH1B	0.139881
PDE3A	0.00388621	DRD4	0.214206	HTR2A	0.236135	FLOT2	0.133896
MMP3	0.00388608	CCNE2	0.212474	PGF	0.234898	BMP7	0.132921
KLK1	0.00388503	LSS	0.212313	CCR5	0.233818	CXCL6	0.132143
LTA4H	0.00387843	GRM2	0.212183	NR1I2	0.233452	ALDH2	0.130946
ALOX5AP	0.00387843	CCR2	0.211944	HTR1A	0.233335	MMP13	0.129046
ADORA1	0.00387638	PPP5C	0.210441	HSD17B1	0.232986	DNMT3B	0.12856
ADORA3	0.00387638	HSD11B1	0.209824	TTR	0.232729	ATP6V0B	0.127788
FPGS	0.00387231	SHH	0.209596	FPR2	0.232729	TCIRG1	0.127788
PDE1B	0.0038712	SCN2A	0.209331	CHRNB4	0.232379	ATP6V0D1	0.127788
PDE1C	0.0038712	KCNJ1	0.208401	CHRNA3	0.232379	MYOG	0.126722
ASAH1	0.00387002	CHRM1	0.208272	MAOA	0.232323	PCBP1	0.125598
UGCG	0.00387002	ASAH1	0.207527	CACNA1B	0.232269	PDYN	0.125425
SIGMAR1	0.00386969	CCR1	0.207401	CCR1	0.231761	PAX3	0.121475
CPT2	0.00386935	CXCR3	0.207401	CXCR3	0.231761	XDH	0.119587
ATP4B	0.00386388	ESRRG	0.207189	TRPM8	0.231395	BAZ1B	0.119006
HTR2B	0.00386274	PRCP	0.206503	AKR1B10	0.231247	CXCL5	0.118542
ECE1	0.0038613	CES1	0.20649	NR1D1	0.231073	P2RY12	0.118467
F10	0.00385537	AKR1B10	0.206056	CAMKK2	0.230359	DIABLO	0.116298
F9	0.00385537	ODC1	0.205995	SIGMAR1	0.229282	AIMP2	0.113419
SCD	0.00384876	EPHX2	0.205729	GRK3	0.228574	CYC1	0.113388
BMX	6.35107e-05	DRD1	0.20442	CDK3	0.228322	HNRNPU	0.112038
SLC5A1	5.94457e-05	IDO1	0.20429	ACACA	0.228106	NPR1	0.103086
CSF1R	5.64797e-05	PDE2A	0.204149	NR1I3	0.227856	MED4	0.100688
KDM5A	5.43618e-05	MMP1	0.203592	CHRNB2	0.227588	MT-ND1	0.100532
ADAM17	5.2265e-05	TNKS2	0.20309	CHRNA4	0.227588	MT-CO1	0.100532
PLA2G10	5.07026e-05	EIF4A1	0.201349	GRK5	0.22733	TMSB4X	0.100387
TUBB1	4.99879e-05	CHRM3	0.199398	SLC18A2	0.227239	CS	0.100195
MARK1	4.99879e-05	CHRM5	0.199398	GBA	0.226481	GAL	0.0993468
EPHB3	4.99372e-05	ACVR1	0.198352	GPR55	0.226048	CRH	0.0984583
EPHA3	4.99372e-05	MMP3	0.197042	F3	0.225056	VIP	0.0975346
EPHB4	4.99372e-05	ADRB1	0.196565	HTR2C	0.224818	MT-CO2	0.0971551
EPHA6	4.99372e-05	PTPRF	0.195329	CCNT1	0.22462	GC	0.0966639
EPHA5	4.99372e-05	HSD11B2	0.194336	CDC7	0.223718	ADORA2A	0.0954948
KDM6B	4.94829e-05	SERPINE1	0.193644	BACE2	0.223492	PTGER2	0.0954948
CMA1	4.93825e-05	GLP1R	0.190788	FABP1	0.2232	CHMP1A	0.0938879
TYR	4.81418e-05	MTNR1B	0.188707	LSS	0.223166	FGR	0.0896265
IGFBP5	4.65456e-05	FBP1	0.188165	POLB	0.223128	PPARD	0.0864856
HDAC10	4.43958e-05	CES2	0.184215	FGF1	0.222776	CDS1	0.0832788
TNKS2	4.43042e-05	HTR2A	0.183907	SLC6A4	0.221488	RALB	0.0832788
OGA	4.42585e-05	SHBG	0.18282	CYP2D6	0.221367	LIG1	0.0830803
BRD9	4.38488e-05	AKR1C2	0.179676	CPT1A	0.220925	SEC13	0.0760826
TEK	4.35323e-05	MMP13	0.178951	CCR3	0.220583	LTC4S	0.0720843
PGD	4.33523e-05	GRK6	0.178806	AGTR1	0.220373	LCT	0.0688045
MMP14	4.18466e-05	EDNRA	0.177811	CDK9	0.219997	PLAU	0.0652848
MMP7	4.18466e-05	EDNRB	0.177811	SCN2A	0.219773	PLAUR	0.0652848
MERTK	4.14985e-05	ACACB	0.176499	TDP1	0.219261	MSH6	0.0546253
DRD1	4.05531e-05	TLR9	0.173476	PTPN22	0.219106	TNFRSF1B	0.0519411
MARK3	4.0129e-05	F9	0.173084	GABBR2	0.218911	PLAT	0.0499438
NAE1	3.9416e-05	MGAM	0.172099	AKR1C1	0.218774	JUND	0.0477182
PLAA	3.83853e-05	CHRM2	0.171995	CXCR1	0.218434	JUNB	0.0477182
XDH	3.49552e-05	GART	0.171291	CHRNA6	0.217738	AKR1C2	0.0458905
PGK1	3.44248e-05	ALDH2	0.170821	GSTM2	0.216615	PPBP	0.0379381
PRKCH	3.31606e-05	AOC3	0.170761	GSTM1	0.216615	CDK3	0.0333973
MAP3K20	3.07283e-05	AKR1A1	0.170529	ASAH1	0.216151	MMP1	0.0283201
PTPRS	3.05544e-05	BDKRB1	0.170113	SF3B3	0.214949	GADD45A	0.0257846
CALCRL	3.04503e-05	FPGS	0.168809	BRD9	0.214814	COX5A	0.0203857
FABP5	3.00363e-05	ATP12A	0.168321	CACNA2D1	0.214007	NDUFS4	0.0203857
GPBAR1	2.98307e-05	ATP4A	0.168321	GABBR1	0.213865	MT-ND3	0.0203857
ADORA2B	2.9592e-05	OPRD1	0.16817	GPER1	0.213779	ADK	0.0177993
HLA-DRB1	2.65016e-05	AKR1C4	0.167738	GSTA1	0.21375	ENTPD4	0.0177993
PDE4B	2.59333e-05	RORB	0.16746	NAT1	0.209654	TYMP	0.0177993
PDE4D	2.59333e-05	GUSB	0.166961	RORC	0.208792	DUSP1	0.0161031
PDE10A	2.59333e-05	NPC1L1	0.165459	TYMP	0.208724	FOSL2	0.0142474
PDE4A	2.59333e-05	SQLE	0.163839	F12	0.207812	FOSL1	0.0142474
PDE7A	2.59333e-05	GRM4	0.161049	MME	0.207373	ENTPD2	0.0138309
SLC37A4	2.56207e-05	OPRM1	0.158965	DRD4	0.207048	BMF	0.0119287
DRD3	2.49407e-05	CPA1	0.156622	ACE	0.206559	NFKBIB	0.0114067
ATP2A1	2.45742e-05	IGFBP1	0.156622	ASF1A	0.20588	COL5A1	0.0113877
SOAT1	2.44224e-05	MDH2	0.156327	GRM2	0.205863	OSM	0.00857353
DGAT1	2.38503e-05	CALCRL	0.155152	KDM4C	0.205087	TNFRSF25	0.00856573
FABP2	2.33743e-05	CCNC	0.15508	IDO1	0.204883	IL1R2	0.00856082
FABP3	2.33743e-05	FDFT1	0.154166	HSD11B1	0.203782	ERCC5	0.00855663
ODC1	2.33152e-05	F2R	0.152936	CHRM1	0.199454	EIF2S2	0.00855503
FAAH	2.2006e-05	GAA	0.147394	ELOVL6	0.199251	NOX4	0.00855087
CNR2	2.2006e-05	POLB	0.147277	PRCP	0.197539	PON1	0.00854753
FPR1	2.15217e-05	LIPC	0.146097	AGL	0.196194	APOA4	0.00854753
RBP4	2.15217e-05	CYP27A1	0.145205	PYGM	0.196194	APOC1	0.00854753
TDO2	2.0129e-05	GALR1	0.144782	PYGL	0.196194	MTA1	0.00573464
PREP	1.87022e-05	CPT1B	0.140743	TYMS	0.196184	ETS2	0.00573379
KCNJ11	1.83073e-05	PTGER2	0.140648	AMPD1	0.196163	LTA	0.00572513
GALR2	1.46069e-05	AMY2A	0.139729	AMPD2	0.196163	EREG	0.00572484
PDE5A	1.21356e-05	BMP4	0.138971	AMPD3	0.196163	CCN2	0.00572293
CCNC	1.11865e-05	HTR6	0.136709	S1PR4	0.1958	PTGES	0.00571959
F13A1	1.01127e-05	CXCR1	0.136073	FDFT1	0.193894	TBX21	0.00571831
GRK6	4.88763e-06	GGH	0.130808	EPHX2	0.192908	TGFB2	0.00571739
IDH1	3.51235e-06	ADRA1A	0.127706	KDM4A	0.192896	GPT	0.00571322
FNTB	1.47733e-06	ADRA1B	0.127706	UPP1	0.191871	IL5RA	0.00571296
MMP13	0	ADRA1D	0.127706	TNKS2	0.19146	MKI67	0.00571237
		HTR2C	0.127595	CHRM3	0.189967	TNFRSF10D	0.00571211
		IKBKE	0.116573	CHRM5	0.189967	ASL	0.00571036
		FLT3	0.111568	EIF4A1	0.189275	OTC	0.00571036
		ACLY	0.1101	PNMT	0.188654	ABCA1	0.00570989
		GABRB3	0.0996165	HSD11B2	0.188465	CAST	0.00570931
		GABRG2	0.0996165	HCN4	0.188434	CAPNS1	0.00570931
		ACACA	0.0982381	CES1	0.188105	DLG2	0.00570637
		FASN	0.0982381	KCNJ11	0.187165	DLG3	0.00570637
		HNF4A	0.0979648	NPC1L1	0.185938	KPNA3	0.00288173
		IDH1	0.0945311	IKBKE	0.185253	NFKBIZ	0.00288173
		FNTA	0.0856511	CPB2	0.184956	DUSP6	0.00288149
		KDM4A	0.083684	PREP	0.184182	KDM5B	0.00288114
		CTRC	0.0832934	MAP3K11	0.182073	PLA2G2A	0.00287969
		CTRB1	0.0832934	GART	0.182021	TNFRSF11A	0.0028795
		IGFBP4	0.0832934	SQLE	0.181483	HSPA1A	0.00287885
		IGFBP6	0.0832934	RORB	0.180973	COL18A1	0.00287711
		CETP	0.0830233	GRK6	0.18037	ICAM3	0.00287686
		PTGER4	0.0798817	SERPINE1	0.179794	PI4KB	0.00287625
		MELK	0.0768379	OPRM1	0.177902	IGF2R	0.00287621
		MDM4	0.0758534	FLT3	0.17779	XRCC3	0.00287536
		TEK	0.0685522	RAC1	0.176865	ACTR3	0.00287491
		HSF1	0.0679438	TAC3	0.173281	PSMD12	0.00287411
		YES1	0.0670109	BDKRB2	0.172368	NRF1	0.00287297
		PTPN2	0.0612273	F9	0.171636	HLA-G	0.00287277
		DUSP3	0.0601063	EDNRA	0.171088	MR1	0.00287277
		RAC1	0.0588217	EDNRB	0.171088	IL1RL1	0.00287198
		GABRA1	0.055454	AKR1C2	0.169619	IL18RAP	0.00287181
		GABRB2	0.055454	MMP1	0.168778	IL18R1	0.00287181
		MAPKAPK2	0.0459872	PLAT	0.168418	TF	0.00287139
		FGR	0.0445245	FBP1	0.167095	CAPZA2	0.00287031
		GABRA4	0.044374	BDKRB1	0.166223	SLC25A5	0.00286862
		MAPKAPK5	0.0432321	ALDH3A1	0.164915	PPIB	0.0028682
		CSNK2A1	0.0394104	STK3	0.164803	SMURF1	0.00286805
		PON1	0.0379754	MMP13	0.162695	LPA	0.0028667
		KDM6B	0.0362649	MELK	0.161981	DLGAP1	0.00286595
		AXL	0.034654	CHRM2	0.161674	SLC6A4	0.00286547
		WEE1	0.0282668	AKR1A1	0.161223	OAS1	0.00286519
		CDK8	0.0230103	ALDH2	0.161024	MX1	0.00286519
		BRD2	0.0199869	OPRD1	0.159288	CSTA	0.00286502
		DBH	0.0182422	CES2	0.159221	IL12A	0.0028635
		RPS6KA1	0.0179259	PON1	0.158845	EPHX2	0.0028621
		MPI	0.0179019	IGFBP1	0.158845	FCER1A	0.002862
		CCNB3	0.0166647	PTGER4	0.158845	CAT	0.00286197
		ALOX12	0.0165211	ATP12A	0.158033	ADAMTS3	0.00286116
		ALOX15B	0.0165211	ATP4A	0.158033	ADAMTS4	0.00286116
		NEK2	0.0165195	AOC3	0.157958	ADORA1	0.00285715
		TTK	0.0165189	P2RY12	0.15711	ADORA3	0.00285715
		PDE1B	0.0161595	AKR1C4	0.153385	CES2	0.00285688
		PDE1C	0.0161595	FASN	0.152962	ORC4	0.0028546
		TXK	0.0137789	PDE2A	0.152449	KCNE1	0.00285347
		CYP26B1	0.0137682	CHRNA1	0.15106	KCNH2	0.00285347
		IMPDH2	0.0137634	GUSB	0.15003	HNRNPDL	0.00285292
		IMPDH1	0.0137634	SCD	0.149081	TRA2B	0.00285292
		PDE10A	0.0134127	GRM4	0.149061	BTN3A2	0.00284529
		RPS6KA4	0.0112719	HTR1B	0.147618	PLIN2	0.00284529
		SELE	0.0110242	CACNA1G	0.141643	CYSLTR1	0.00283987
		APH1B	0.0110228	F2R	0.140598	CYSLTR2	0.00283987
		STS	0.0110197	ACLY	0.138055	S100A4	4.87839e-05
		HSPA1A	0.00828797	CYP27A1	0.137637	ZNF385A	4.87839e-05
		DAPK2	0.0082875	CHRNA2	0.136686	CLEC3B	4.42684e-05
		DAPK3	0.0082875	ADRA1A	0.12771	TNS3	4.28876e-05
		CTSD	0.00828412	ADRA1B	0.12771	DUSP5	4.05485e-05
		HDAC5	0.00828002	ADRA1D	0.12771	ERBIN	3.91501e-05
		RARG	0.00827481	DAO	0.12771	FER	3.89971e-05
		RARB	0.00827481	HAO2	0.12771	KDM3A	3.62874e-05
		AGTR2	0.00827313	HAO1	0.12771	SLC7A11	3.60354e-05
		PNMT	0.00826645	PSMB1	0.12771	CHKA	3.51464e-05
		F10	0.00826449	PSMB2	0.12771	CD55	3.46906e-05
		F7	0.00826449	PSMB5	0.12771	CLDN7	3.43084e-05
		CCR3	0.00826041	SORD	0.12727	TEK	3.42393e-05
		EHMT1	0.00554496	MDM4	0.125149	BAP1	3.39294e-05
		MKNK2	0.00554056	PRPF4	0.124113	ASPN	3.36556e-05
		RPS6KA3	0.00554044	GABRB3	0.122293	RHOG	3.22776e-05
		RPS6KA2	0.00554044	GABRA1	0.115643	PAG1	3.10367e-05
		PGK1	0.00553785	MGAM	0.115197	ADRB2	2.95791e-05
		CTSK	0.0055359	AMY2A	0.115197	KIF3A	2.95791e-05
		MBD2	0.0055358	TRPC6	0.111926	PLCD4	2.89907e-05
		PIK3C2G	0.0055352	TDO2	0.111277	IL1RL2	2.8289e-05
		ERCC5	0.0055336	CCNC	0.107541	PITRM1	2.74496e-05
		FGFR4	0.00553206	FNTA	0.10463	MMP17	2.6743e-05
		PBRM1	0.00552999	PPM1A	0.101765	IL21	2.66846e-05
		GDA	0.00552813	CPB1	0.101382	OLR1	2.66263e-05
		P2RX3	0.00552804	AXL	0.0948258	CPT1A	2.59904e-05
		P2RX7	0.00552804	CETP	0.0832967	GDF15	2.5676e-05
		NR1H2	0.005528	IGFBP4	0.0832967	HLA-DQB1	2.55907e-05
		DBF4	0.00552705	IGFBP6	0.0832967	MIF	2.55907e-05
		CTSG	0.00552671	PLA2G7	0.0832967	TSLP	2.55622e-05
		ELANE	0.00552671	PTGER1	0.0832967	BMP6	2.25235e-05
		TAOK1	0.00552489	PTGER2	0.0832967	ID2	2.21296e-05
		TAOK2	0.00552489	YES1	0.0820866	LILRA2	2.15844e-05
		TAOK3	0.00552489	CDK8	0.0819588	FURIN	2.15329e-05
		LGMN	0.00552356	CENPE	0.0781865	DLGAP3	2.11996e-05
		PLAT	0.0055233	CHRND	0.0652101	AMH	2.06921e-05
		TK1	0.00552129	CHRNB1	0.0652101	WIF1	2.06417e-05
		QDPR	0.00551664	TEK	0.0580178	RAB2A	2.00916e-05
		PFKFB3	0.0055165	FGR	0.0563491	GABARAP	1.90139e-05
		XPO1	0.00279778	KMO	0.0525447	F9	1.88211e-05
		SETD7	0.00279733	DUSP1	0.0513069	KLRB1	1.77543e-05
		BCL2A1	0.00279368	CHRNG	0.0499631	COL7A1	1.76375e-05
		WNT3	0.00279301	FARS2	0.0499631	USP15	1.76142e-05
		CA9	0.00279059	KCNJ1	0.0489596	TAP2	1.75444e-05
		CTSH	0.00278906	ABAT	0.0467947	TAF6	1.66028e-05
		CTSV	0.00278906	MAP3K14	0.0466285	HLCS	1.65122e-05
		KDM5B	0.00278867	DUSP3	0.0458115	PCSK1	1.64218e-05
		BAZ2A	0.00278859	CPA1	0.0453891	UBE2A	1.53098e-05
		KDM5C	0.00278857	CHRNB3	0.0401258	NR1I2	1.45723e-05
		PARP3	0.00278841	GABRG2	0.039382	IL17B	1.39759e-05
		PLA2G2A	0.00278805	PDE11A	0.038997	DCT	1.25265e-05
		EPHA1	0.00278506	PDE10A	0.038997	FPR1	1.15063e-05
		EPHA4	0.00278463	PDE1C	0.038997	STRN4	1.10753e-05
		EPHA3	0.00278463	TTK	0.0355351	SAT1	1.09392e-05
		EPHA7	0.00278463	S1PR1	0.0339075	SUMO3	1.05918e-05
		EPHB2	0.00278463	BRD2	0.0317038	ARTN	9.53269e-06
		SF3B3	0.00278379	NLK	0.0300351	ZMPSTE24	9.40258e-06
		PGD	0.00278286	WEE1	0.0297479	SUN2	9.40258e-06
		BRD3	0.00278221	PKN2	0.0294862	ADAMTS17	8.723e-06
		AHCY	0.00278186	NOD1	0.0288048	FST	8.19977e-06
		SORT1	0.00278028	ITGA1	0.0247556	COL10A1	7.00415e-06
		S1PR3	0.00277992	TEC	0.0196944	AKR1A1	6.67768e-06
		MIF	0.00277978	CBX4	0.0192619	EHHADH	6.67768e-06
		MAP3K20	0.00277978	CBX7	0.0192619	DEK	6.45617e-06
		KLK1	0.0027784	CBX8	0.0192619	MYF5	6.40526e-06
		PDE4B	0.00277807	RPS6KA1	0.0188122	P2RY1	6.38831e-06
		PDE7A	0.00277807	CCNB3	0.0179598	IARS1	5.75066e-06
		CAPNS1	0.00277807	NEK2	0.0165127	CDK19	4.13084e-06
		SLC5A2	0.00277666	PBK	0.0165126	DLST	4.06774e-06
		PREP	0.00277666	ALDH1A1	0.0165087	NPPB	4.06774e-06
		TNNC1	0.00277621	CYP26B1	0.0165087	VPS4A	3.25881e-06
		TNNT2	0.00277621	CYP26A1	0.0165087	GALR2	3.22811e-06
		PLAU	0.00277598	STS	0.0165074	UNG	1.86288e-06
		ADORA1	0.00277408	PTPN2	0.0137754	PEF1	9.52457e-07
		ADORA3	0.00277408	TXK	0.0137715	B4GALT1	0
		LTA4H	0.0027735	ALOX12	0.0137673
		ALOX5AP	0.0027735	IMPDH2	0.0137576
		PDE5A	0.00277284	IMPDH1	0.0137576
		HTR1B	0.00277272	RPS6KA4	0.0110213
		FAAH	0.00277174	SELE	0.0110179
		OAT	0.00277131	APH1B	0.0110168
		CHRNA7	0.00276899	RARG	0.0110147
		CPT2	0.00276894	RARB	0.0110147
		LIPG	0.00276857	CHRNA7	0.0110049
		SOAT2	0.00276752	RPS6KA3	0.00828162
		SOAT1	0.00276752	RPS6KA2	0.00828162
		HTR2B	0.00276359	DAPK2	0.00828056
		ECE1	0.00276354	DAPK3	0.00828056
		ATP4B	0.00276277	INSRR	0.00827778
		SCD	0.00275401	CTSD	0.00827658
		HIPK4	5.0385e-05	MAPKAPK5	0.0082744
		KMT5A	5.0385e-05	P2RX3	0.00826941
		KDM4B	4.73678e-05	P2RX7	0.00826941
		BMX	4.63101e-05	P2RX4	0.00826941
		NR5A1	4.5363e-05	HTR2B	0.00826939
		SLC5A1	4.44091e-05	DBF4	0.00826826
		KDM5A	4.17504e-05	NR1H2	0.00826784
		CSF1R	4.13624e-05	AGTR2	0.00826678
		TUBB1	3.93786e-05	TAOK1	0.00826624
		TUBB3	3.93786e-05	TAOK2	0.00826624
		MARK1	3.93786e-05	TAOK3	0.00826624
		PLA2G10	3.82204e-05	QDPR	0.00826559
		EPHA8	3.78185e-05	F10	0.00825916
		EPHB3	3.78185e-05	F7	0.00825916
		EPHB4	3.78185e-05	HSF1	0.00553565
		EPHA6	3.78185e-05	PTPRA	0.00553415
		EPHB1	3.78185e-05	PHLPP2	0.00553351
		EPHA5	3.78185e-05	MKNK2	0.00553346
		PITRM1	3.74439e-05	CTSK	0.00552877
		NAE1	3.74439e-05	PGK1	0.00552858
		TYR	3.71885e-05	PARP3	0.00552768
		CMA1	3.70039e-05	CAMK2D	0.00552664
		CDC42BPA	3.69119e-05	PTPRF	0.00552576
		IGFBP5	3.54256e-05	SHH	0.0055215
		PLEC	3.53814e-05	CTSG	0.00552048
		POLA1	3.53814e-05	ELANE	0.00552048
		MARK3	3.47691e-05	SIRT3	0.00552027
		CA2	3.44882e-05	PLAU	0.00551601
		PHKG2	3.41881e-05	PLAUR	0.00551601
		OGA	3.41454e-05	UGCG	0.00551325
		HDAC10	3.38269e-05	GBA2	0.00551325
		PPM1B	3.34484e-05	GABRB2	0.00550054
		ASF1A	3.31775e-05	SMYD2	0.00279167
		ACKR3	3.26826e-05	SLC2A1	0.00278967
		MERTK	3.19128e-05	KCNMA1	0.00278705
		PLAA	3.17728e-05	ATP1A1	0.00278648
		S1PR1	3.16135e-05	BCL2A1	0.00278624
		S1PR2	3.16135e-05	HSPA1A	0.00278624
		MMP14	3.14351e-05	CSF1R	0.0027834
		MMP7	3.14351e-05	CA9	0.00278211
		BCHE	2.97185e-05	CTSH	0.00278188
		ATP2A1	2.95496e-05	CTSC	0.00278188
		TNNI3K	2.94002e-05	CTSV	0.00278188
		NOX4	2.93629e-05	PI4KB	0.0027813
		GNRHR	2.75325e-05	PIK3C2G	0.0027813
		CHRM4	2.7269e-05	KDM5B	0.00278077
		P2RY12	2.71119e-05	KDM5C	0.00278065
		ADORA2B	2.66279e-05	KDM6B	0.00278047
		PRKCH	2.64397e-05	TNK2	0.00278033
		PDE6D	2.6016e-05	EIF2AK1	0.00277976
		PDE9A	2.6016e-05	PLA2G2A	0.00277964
		DUT	2.50865e-05	CAMK1	0.00277869
		RBP4	2.43906e-05	EPHA1	0.00277753
		FABP5	2.41514e-05	EPHA4	0.00277716
		GPBAR1	2.4088e-05	EPHA3	0.00277716
		SLC10A2	2.4088e-05	EPHA7	0.00277716
		CNR2	2.32279e-05	EPHB2	0.00277716
		MT-ND4	2.29668e-05	BRD3	0.00277556
		FPR1	2.29057e-05	PBRM1	0.00277553
		SLC37A4	2.27382e-05	HMOX1	0.0027753
		F13A1	2.23161e-05	PGD	0.00277496
		FABP2	2.21072e-05	AHCY	0.00277467
		FABP3	2.21072e-05	S1PR3	0.0027743
		DRD5	2.1944e-05	SORT1	0.00277313
		FFAR1	2.1944e-05	MIF	0.00277312
		GCGR	2.1944e-05	MAP3K6	0.00277248
		GIPR	2.1944e-05	KLK1	0.00277209
		HLA-DRB1	2.15618e-05	MMP3	0.00277206
		CACNA2D1	2.07832e-05	CAPNS1	0.00277165
		CACNA2D2	2.07832e-05	ADRB1	0.00277161
		DGAT1	2.07547e-05	ADRB3	0.00277161
		SCN9A	2.07547e-05	TNNC1	0.00277097
		DRD3	2.06412e-05	TNNT2	0.00277097
		ESRRA	2.0514e-05	SLC5A2	0.00277071
		LNPEP	2.00521e-05	GLP1R	0.00277071
		CASR	1.98032e-05	ABCB11	0.00276954
		KCNJ11	1.98032e-05	ADORA1	0.00276838
		SRM	1.96385e-05	ADORA3	0.00276838
		PDCD4	1.92306e-05	LTA4H	0.00276745
		MMP10	1.90556e-05	ALOX5AP	0.00276745
		TDO2	1.89083e-05	EBP	0.00276724
		MTNR1A	1.84185e-05	PORCN	0.00276708
		SERPINA6	1.77439e-05	WNT3	0.00276708
		ADAMTS4	1.72988e-05	PDE5A	0.0027668
		ABAT	1.45505e-05	CDK13	0.00276638
		CALCA	1.45276e-05	FAAH	0.00276622
		GALR2	1.33019e-05	CALCRL	0.00276569
		HTR7	1.23402e-05	RAMP1	0.00276569
		SLC19A1	1.13023e-05	SOAT2	0.00276479
		MGMT	6.86067e-06	SOAT1	0.00276479
		PTGER1	5.37173e-06	CCR8	0.00276476
		FNTB	5.27798e-06	TK1	0.00276462
		PGGT1B	5.27798e-06	CHRNA5	0.00276426
		PLA2G7	0	HTR1D	0.00276235
				ECE1	0.00275936
				MPI	0.0027587
				PFKFB3	0.0027587
				ATP4B	0.00275837
				GABRA4	0.00275367
				GAA	0.00275353
				HIPK4	4.15022e-05
				KMT5A	4.15022e-05
				PIN1	4.15022e-05
				ATAD2	3.97099e-05
				KCNK2	3.88903e-05
				BMX	3.83383e-05
				SLC5A1	3.68828e-05
				RASGRP1	3.52716e-05
				RASGRP3	3.52716e-05
				BAZ2A	3.37692e-05
				KDM5A	3.37692e-05
				TUBB1	3.2913e-05
				TUBB3	3.2913e-05
				MARK1	3.2913e-05
				DNM1	3.24246e-05
				RET	3.24246e-05
				PITRM1	3.20964e-05
				NAE1	3.20964e-05
				PLA2G10	3.074e-05
				NOX4	3.04824e-05
				EPHA8	3.02813e-05
				EPHB3	3.02813e-05
				EPHB4	3.02813e-05
				EPHA6	3.02813e-05
				EPHB1	3.02813e-05
				EPHA5	3.02813e-05
				CMA1	3.02631e-05
				CDC42BPA	3.00634e-05
				MARK3	2.92408e-05
				PHKG2	2.87498e-05
				CA2	2.8715e-05
				CX3CR1	2.86803e-05
				IGFBP5	2.85416e-05
				PRMT8	2.76544e-05
				HDAC10	2.72031e-05
				OGA	2.71534e-05
				HASPIN	2.71534e-05
				MERTK	2.68072e-05
				MAP3K10	2.67253e-05
				MAP3K13	2.67253e-05
				MAP3K12	2.67253e-05
				S1PR2	2.60779e-05
				ACKR3	2.58543e-05
				DRD1	2.58384e-05
				PLAA	2.55535e-05
				MMP14	2.50998e-05
				MMP7	2.50998e-05
				LGALS9	2.43327e-05
				PTPRCAP	2.43327e-05
				ATP2A1	2.35548e-05
				ACPP	2.24383e-05
				CECR2	2.19443e-05
				HDAC8	2.19443e-05
				PRKCH	2.1749e-05
				GNRHR	2.17351e-05
				GSTK1	2.15964e-05
				CHRM4	2.14997e-05
				PHOSPHO1	2.05634e-05
				DKK1	2.02051e-05
				ADORA2B	2.01788e-05
				PDE9A	1.98513e-05
				POLA1	1.97084e-05
				LAP3	1.95919e-05
				MC1R	1.94375e-05
				PDE8B	1.92711e-05
				PDE4B	1.92711e-05
				PDE7A	1.92711e-05
				OAT	1.88782e-05
				FPR1	1.86901e-05
				RBP4	1.86901e-05
				GPBAR1	1.85156e-05
				SLC10A2	1.85156e-05
				FABP5	1.8466e-05
				CNR2	1.80719e-05
				TRPV3	1.80475e-05
				LIPA	1.79135e-05
				GPR119	1.77438e-05
				SLC18A3	1.76714e-05
				CPT2	1.72648e-05
				FABP2	1.69344e-05
				FABP3	1.69344e-05
				HLA-DRB1	1.69109e-05
				USP47	1.67707e-05
				TDP2	1.6666e-05
				ABHD6	1.65964e-05
				LIPG	1.65964e-05
				SCN9A	1.65617e-05
				SCN4A	1.65617e-05
				F13A1	1.63198e-05
				DRD3	1.57528e-05
				CASR	1.54848e-05
				CYP24A1	1.54404e-05
				LNPEP	1.48158e-05
				HCN1	1.42481e-05
				DUT	1.40897e-05
				ABCC9	1.38383e-05
				EIF4H	1.33428e-05
				PDCD4	1.33428e-05
				PABPC1	1.33428e-05
				DPP8	1.32204e-05
				DPP9	1.32204e-05
				ADAMTS4	1.2038e-05
				TACR3	1.1787e-05
				TACR1	1.1787e-05
				TACR2	1.1787e-05
				P2RY1	1.14911e-05
				FADS1	1.0153e-05
				IDH1	9.0572e-06
				KHK	8.24941e-06
				PRPF4B	8.20811e-06
				FNTB	5.55086e-06
				PGGT1B	5.55086e-06
				AADAT	7.68925e-07
				CTRC	0

## Sheet: Table 8
Supplementary Table 8: Final Score Calculation Results for TSD, YJD, PQT, and LDH Targets
label	target name	final_score
TSD and LDH	TP53	0.525491
TSD and LDH	STAT3	0.433801
TSD and LDH	AKT1	0.557524
TSD and LDH	ESR1	0.817863
TSD and LDH	PIK3CA	0.338976
TSD and LDH	MAPK1	0.302091
TSD and LDH	MAPK3	0.331677
TSD and LDH	CTNNB1	0.385099
TSD and LDH	PIK3R1	0.345233
TSD and LDH	EGFR	0.680329
TSD and LDH	HSP90AB1	0.287972
TSD and LDH	JUN	0.422848
TSD and LDH	PIK3CB	0.280541
TSD and LDH	PIK3CD	0.290095
TSD and LDH	BCL2	0.298906
TSD and LDH	CREBBP	0.291873
TSD and LDH	HIF1A	0.240036
TSD and LDH	CASP3	0.309718
TSD and LDH	HDAC1	0.323796
TSD and LDH	PTGS2	0.610078
TSD and LDH	ERBB2	0.271169
TSD and LDH	TNF	0.393287
TSD and LDH	CCND1	0.293878
TSD and LDH	GSK3B	0.372138
TSD and LDH	SIRT1	0.21478
TSD and LDH	MAPK14	0.319959
TSD and LDH	IL6	0.364907
TSD and LDH	MTOR	0.258608
TSD and LDH	RAF1	0.23696
TSD and LDH	NR3C1	0.580893
TSD and LDH	BCL2L1	0.265972
TSD and LDH	MDM2	0.318473
TSD and LDH	PRKCB	0.191744
TSD and LDH	LYN	0.212669
TSD and LDH	PPARG	0.310207
TSD and LDH	PRKCD	0.270067
TSD and LDH	IKBKB	0.248176
TSD and LDH	CDK2	0.359643
TSD and LDH	NCOR2	0.159306
TSD and LDH	CCNB1	0.273971
TSD and LDH	CCNA2	0.234625
TSD and LDH	MET	0.315194
TSD and LDH	APP	0.302872
TSD and LDH	FGFR1	0.184821
TSD and LDH	G6PD	0.363236
TSD and LDH	IL1B	0.332541
TSD and LDH	FGF2	0.251595
TSD and LDH	PRKCE	0.150839
TSD and LDH	BRD4	0.195896
TSD and LDH	LCK	0.261643
TSD and LDH	ITGB2	0.241436
TSD and LDH	CDK4	0.239342
TSD and LDH	PARP1	0.344527
TSD and LDH	PPARA	0.194867
TSD and LDH	CYP3A4	0.145327
TSD and LDH	THRB	0.165568
TSD and LDH	PIK3CG	0.25961
TSD and LDH	RPS6KB1	0.206635
TSD and LDH	MAP2K1	0.173056
TSD and LDH	CYP1A1	0.160475
TSD and LDH	DNMT1	0.189523
TSD and LDH	KNG1	0.140846
TSD and LDH	TRPV1	0.128135
TSD and LDH	MAP2K2	0.147146
TSD and LDH	IL6ST	0.173417
TSD and LDH	PTK2B	0.138106
TSD and LDH	ICAM1	0.318825
TSD and LDH	CALM1	0.166354
TSD and LDH	ATM	0.181423
TSD and LDH	MMP9	0.351628
TSD and LDH	AHR	0.220922
TSD and LDH	AURKA	0.241291
TSD and LDH	EZR	0.174338
TSD and LDH	TYK2	0.18107
TSD and LDH	IL2	0.209673
TSD and LDH	MMP2	0.308847
TSD and LDH	CCNE1	0.20354
TSD and LDH	MCL1	0.190819
TSD and LDH	CYP2C9	0.181897
TSD and LDH	TGFBR2	0.172543
TSD and LDH	ITGA2	0.165177
TSD and LDH	NOS2	0.350764
TSD and LDH	CDC25A	0.354981
TSD and LDH	STAT6	0.172836
TSD and LDH	CYP2C19	0.300987
TSD and LDH	HCK	0.159325
TSD and LDH	PLA2G4A	0.139786
TSD and LDH	VCAM1	0.219807
TSD and LDH	CAPN1	0.201329
TSD and LDH	CAPN2	0.185683
TSD and LDH	CTSB	0.184618
TSD and LDH	AKR1C3	0.170583
TSD and LDH	KCNH2	0.0240359
TSD and LDH	HDAC3	0.164636
TSD and LDH	ADK	0.0235759
TSD and LDH	CTSL	0.171475
TSD and LDH	UGT2B7	0.204456
TSD and LDH	SNCA	0.14051
TSD and LDH	PTGS1	0.216086
TSD and LDH	CASP7	0.1605
TSD and LDH	COMT	0.0899567
TSD and LDH	UBA2	0.101642
TSD and LDH	CASP6	0.152667
TSD and LDH	SCARB1	0.136818
TSD and LDH	PTGES	0.0707939
TSD and LDH	REN	0.0871224
TSD and LDH	CASP1	0.180183
TSD and LDH	SELL	0.171885
TSD and LDH	ADORA2A	0.146132
TSD and LDH	PPARD	0.168901
TSD and LDH	SLC2A1	0.161669
TSD and LDH	MPO	0.16262
TSD and LDH	NR1I2	0.0170251
TSD and LDH	CPT1A	0.0111824
TSD and LDH	AGTR1	0.121661
TSD and LDH	ANPEP	0.130207
TSD and LDH	CYP1B1	0.17084
TSD and LDH	GSR	0.187923
TSD and LDH	SLC6A4	0.119347
TSD and LDH	AKR1C1	0.12811
TSD and LDH	GSTM1	0.130896
TSD and LDH	GSTA1	0.0877734
TSD and LDH	MMP1	0.0627687
TSD and LDH	EPHX2	0.0349288
TSD and LDH	ACE	0.152296
TSD and LDH	CES1	0.0955513
TSD and LDH	IDO1	0.160253
TSD and LDH	FPR2	0.0842863
TSD and LDH	TERT	0.232243
TSD and LDH	ALDH2	0.069467
TSD and LDH	CES2	0.121507
TSD and LDH	OPRD1	0.093613
TSD and LDH	EDNRB	0.0996076
TSD and LDH	F2	0.176009
TSD and LDH	AKR1A1	0.02287
TSD and LDH	F2R	0.104901
TSD and LDH	DNMT3B	0.0665618
TSD and LDH	CSNK2A1	0.190111
TSD and LDH	PTGER2	0.0966281
TSD and LDH	OPRM1	0.0964802
TSD and LDH	ACACA	0.110048
TSD and LDH	FGR	0.0459193
TSD and LDH	CCR3	0.118377
TSD and LDH	MIF	0.00116904
TSD and LDH	SELP	0.156261
TSD and LDH	KCNE1	0.00162386
TSD and LDH	KCNQ1	0.0901263
TSD and LDH	AKR1C2	0.024719
TSD and LDH	HSPA1A	0.0015391
TSD and LDH	PI4KB	0.00173702
TSD and LDH	KDM5B	0.00153998
TSD and LDH	PLA2G2A	0.00183769
TSD and LDH	CAPNS1	0.00305292
TSD and LDH	MMP3	0.135675
TSD and LDH	ADORA1	0.00291252
TSD and LDH	ADORA3	0.00281358
TSD and LDH	F9	0.000107689
TSD and LDH	TYR	0.0840773
TSD and LDH	TEK	1.93404e-05
TSD and LDH	MMP14	0.129946
TSD and LDH	MMP7	0.123336
TSD and LDH	XDH	0.0598014
TSD and LDH	HLA-DRB1	0.078641
TSD and LDH	ODC1	0.0775507
TSD and LDH	FPR1	6.8511e-06
TSD and LDH	GALR2	1.9864e-06
TSD and LDH	MMP13	0.0645232
YJD and LDH	TP53	0.517348
YJD and LDH	AKT1	0.521784
YJD and LDH	MAPK1	0.365447
YJD and LDH	MAPK3	0.366868
YJD and LDH	ESR1	0.817863
YJD and LDH	STAT3	0.466144
YJD and LDH	PIK3CA	0.392086
YJD and LDH	CTNNB1	0.349886
YJD and LDH	PIK3R1	0.345102
YJD and LDH	EGFR	0.63812
YJD and LDH	JUN	0.388635
YJD and LDH	HSP90AB1	0.378017
YJD and LDH	HIF1A	0.245966
YJD and LDH	PIK3CB	0.310575
YJD and LDH	HDAC1	0.347685
YJD and LDH	PIK3CD	0.312315
YJD and LDH	RELA	0.287129
YJD and LDH	NFKB1	0.286495
YJD and LDH	CREBBP	0.288523
YJD and LDH	BCL2	0.299235
YJD and LDH	AKT2	0.2414
YJD and LDH	CASP3	0.312947
YJD and LDH	SIRT1	0.223327
YJD and LDH	GSK3B	0.394099
YJD and LDH	APP	0.305682
YJD and LDH	IL6	0.370511
YJD and LDH	MAPK14	0.333111
YJD and LDH	PTGS2	0.562757
YJD and LDH	RAF1	0.307818
YJD and LDH	CCND1	0.339656
YJD and LDH	TNF	0.493537
YJD and LDH	PPARG	0.402695
YJD and LDH	ERBB2	0.317967
YJD and LDH	MTOR	0.310234
YJD and LDH	MDM2	0.355905
YJD and LDH	IKBKB	0.254162
YJD and LDH	PRKCB	0.203566
YJD and LDH	CHUK	0.213673
YJD and LDH	NR3C1	0.475893
YJD and LDH	BCL2L1	0.309703
YJD and LDH	CDK2	0.414114
YJD and LDH	CDC42	0.20074
YJD and LDH	LYN	0.221293
YJD and LDH	PRKCD	0.251002
YJD and LDH	NCOR2	0.17533
YJD and LDH	G6PD	0.299302
YJD and LDH	CCNA2	0.263662
YJD and LDH	STAT5B	0.188986
YJD and LDH	MAP2K1	0.204259
YJD and LDH	VAV1	0.178957
YJD and LDH	RPS6KB1	0.22763
YJD and LDH	PPARA	0.284158
YJD and LDH	CCNB1	0.322792
YJD and LDH	IL1B	0.327672
YJD and LDH	BRD4	0.196869
YJD and LDH	CALM1	0.168824
YJD and LDH	FGFR1	0.184958
YJD and LDH	MAP2K2	0.149468
YJD and LDH	ITGB2	0.231781
YJD and LDH	FGF2	0.233692
YJD and LDH	BAD	0.162152
YJD and LDH	HSPA5	0.173567
YJD and LDH	CASP8	0.228861
YJD and LDH	ATM	0.181371
YJD and LDH	MET	0.314054
YJD and LDH	DNMT1	0.184796
YJD and LDH	EZR	0.18727
YJD and LDH	CDK4	0.290249
YJD and LDH	ICAM1	0.281249
YJD and LDH	ITGA2	0.163448
YJD and LDH	HSPB1	0.164708
YJD and LDH	TRPV1	0.186723
YJD and LDH	CYP1A2	0.153381
YJD and LDH	PIK3CG	0.260413
YJD and LDH	PARP1	0.329668
YJD and LDH	GSTP1	0.171552
YJD and LDH	PRKCE	0.164647
YJD and LDH	RIPK1	0.189452
YJD and LDH	TGFB1	0.215816
YJD and LDH	THRB	0.164883
YJD and LDH	TERT	0.325237
YJD and LDH	CYP3A4	0.158937
YJD and LDH	LCK	0.265518
YJD and LDH	CHEK2	0.169038
YJD and LDH	KNG1	0.131106
YJD and LDH	MMP9	0.344566
YJD and LDH	CYP1A1	0.159544
YJD and LDH	HDAC4	0.154576
YJD and LDH	PTK2B	0.132458
YJD and LDH	STAT6	0.178865
YJD and LDH	XIAP	0.197686
YJD and LDH	AURKA	0.253044
YJD and LDH	IL6ST	0.176471
YJD and LDH	ITGB3	0.195631
YJD and LDH	AHR	0.202172
YJD and LDH	TGFBR2	0.163871
YJD and LDH	SNCA	0.151221
YJD and LDH	HDAC3	0.18558
YJD and LDH	NLRP3	0.171982
YJD and LDH	PLA2G4A	0.177046
YJD and LDH	TYK2	0.195261
YJD and LDH	CYP2C9	0.200358
YJD and LDH	MCL1	0.223607
YJD and LDH	ALB	0.201028
YJD and LDH	CCNE1	0.228081
YJD and LDH	IL2	0.249157
YJD and LDH	MMP2	0.339794
YJD and LDH	VCAM1	0.196111
YJD and LDH	EHMT2	0.146352
YJD and LDH	NOS2	0.349822
YJD and LDH	CDC25A	0.299362
YJD and LDH	CYP2C19	0.225673
YJD and LDH	ITGA2B	0.182291
YJD and LDH	HCK	0.176788
YJD and LDH	SLC2A1	0.164162
YJD and LDH	ATR	0.148519
YJD and LDH	CAPN1	0.212545
YJD and LDH	CAPN2	0.180193
YJD and LDH	NQO1	0.162552
YJD and LDH	CTSB	0.191002
YJD and LDH	AKR1C3	0.172455
YJD and LDH	CCND3	0.15202
YJD and LDH	CASP7	0.162624
YJD and LDH	KCNH2	0.034282
YJD and LDH	ADRB2	0.0137644
YJD and LDH	HPGDS	0.160955
YJD and LDH	ADK	0.0275933
YJD and LDH	ADORA2A	0.196686
YJD and LDH	DNMT3B	0.0692933
YJD and LDH	XDH	0.12496
YJD and LDH	PTGS1	0.26104
YJD and LDH	UGT2B7	0.127825
YJD and LDH	KCNE1	0.00635023
YJD and LDH	KCNQ1	0.0948526
YJD and LDH	CASP1	0.17947
YJD and LDH	CASP6	0.156047
YJD and LDH	CYP1B1	0.186123
YJD and LDH	CTSL	0.182939
YJD and LDH	COMT	0.106893
YJD and LDH	PI4KB	0.0152393
YJD and LDH	F2	0.214138
YJD and LDH	SELL	0.165263
YJD and LDH	GSR	0.182963
YJD and LDH	PTGES	0.101441
YJD and LDH	SELP	0.166733
YJD and LDH	REN	0.0892755
YJD and LDH	UBA2	0.105056
YJD and LDH	SCARB1	0.134949
YJD and LDH	PPARD	0.145502
YJD and LDH	CPT1A	0.0140502
YJD and LDH	ANPEP	0.130747
YJD and LDH	MPO	0.153964
YJD and LDH	NR1I2	0.0177432
YJD and LDH	CDK3	0.0315677
YJD and LDH	ACE	0.159918
YJD and LDH	FPR2	0.0851601
YJD and LDH	GSTM1	0.131011
YJD and LDH	GSTA1	0.0877479
YJD and LDH	AGTR1	0.140031
YJD and LDH	TYMP	0.0153486
YJD and LDH	AKR1C1	0.119475
YJD and LDH	SLC6A4	0.0755451
YJD and LDH	CXCR3	0.142277
YJD and LDH	CES1	0.11991
YJD and LDH	ODC1	0.110921
YJD and LDH	EPHX2	0.0371397
YJD and LDH	IDO1	0.164893
YJD and LDH	MMP1	0.0907278
YJD and LDH	MMP3	0.244279
YJD and LDH	CES2	0.122937
YJD and LDH	AKR1C2	0.0593299
YJD and LDH	MMP13	0.13493
YJD and LDH	EDNRB	0.110633
YJD and LDH	F9	0.00401341
YJD and LDH	ALDH2	0.101053
YJD and LDH	AKR1A1	0.0236821
YJD and LDH	OPRD1	0.0962849
YJD and LDH	OPRM1	0.103555
YJD and LDH	F2R	0.102723
YJD and LDH	PTGER2	0.107153
YJD and LDH	ACACA	0.109898
YJD and LDH	TEK	0.00318941
YJD and LDH	HSF1	0.124072
YJD and LDH	RAC1	0.113094
YJD and LDH	FGR	0.0463583
YJD and LDH	CSNK2A1	0.16876
YJD and LDH	PON1	0.00559154
YJD and LDH	HSPA1A	0.00158298
YJD and LDH	CCR3	0.116728
YJD and LDH	ERCC5	0.00431005
YJD and LDH	CTSG	0.108304
YJD and LDH	PLAT	0.0250355
YJD and LDH	KDM5B	0.00150485
YJD and LDH	PLA2G2A	0.00184289
YJD and LDH	MIF	0.000511142
YJD and LDH	CAPNS1	0.00296692
YJD and LDH	PLAU	0.0328509
YJD and LDH	ADORA1	0.0027445
YJD and LDH	ADORA3	0.00255189
YJD and LDH	PITRM1	1.47936e-05
YJD and LDH	TYR	0.0840796
YJD and LDH	MMP14	0.129946
YJD and LDH	MMP7	0.123337
YJD and LDH	NOX4	0.0042854
YJD and LDH	P2RY12	0.0592339
YJD and LDH	FPR1	6.31739e-06
YJD and LDH	HLA-DRB1	0.0786403
YJD and LDH	SCN9A	0.124978
YJD and LDH	ADAMTS4	0.00143075
YJD and LDH	GALR2	1.61405e-06
PQT and LDH	ALDH2	0.0819023
PQT and LDH	TP53	0.503612
PQT and LDH	ATM	0.179105
PQT and LDH	HSP90AB1	0.296089
PQT and LDH	ACACA	0.109018
PQT and LDH	CPT1A	0.000810918
PQT and LDH	ACE	0.106696
PQT and LDH	REN	0.0871172
PQT and LDH	AGTR1	0.119791
PQT and LDH	KNG1	0.133875
PQT and LDH	IL2	0.215597
PQT and LDH	ANPEP	0.108056
PQT and LDH	HSPA5	0.168368
PQT and LDH	APP	0.317759
PQT and LDH	ADORA2A	0.19863
PQT and LDH	ADK	0.0266091
PQT and LDH	TNF	0.4089
PQT and LDH	ADAMTS4	0.00143089
PQT and LDH	MMP13	0.126663
PQT and LDH	PRKCD	0.229578
PQT and LDH	ADORA1	0.00290088
PQT and LDH	ADORA3	0.00262591
PQT and LDH	ADRB2	0.00587486
PQT and LDH	F2	0.207632
PQT and LDH	DNMT3A	0.124523
PQT and LDH	DNMT1	0.181755
PQT and LDH	AHR	0.225315
PQT and LDH	ESR1	0.817863
PQT and LDH	CYP1A1	0.164357
PQT and LDH	AKR1A1	0.0321751
PQT and LDH	AKR1C3	0.194459
PQT and LDH	AKR1C1	0.137281
PQT and LDH	UGT2B7	0.147165
PQT and LDH	AKR1C2	0.0659816
PQT and LDH	CYP3A4	0.1679
PQT and LDH	HPGDS	0.140096
PQT and LDH	CYP1A2	0.147895
PQT and LDH	CYP1B1	0.1995
PQT and LDH	AKT1	0.556967
PQT and LDH	MAPK1	0.397147
PQT and LDH	RPS6KB1	0.201522
PQT and LDH	CCND1	0.279578
PQT and LDH	MAPK14	0.362576
PQT and LDH	MDM2	0.338494
PQT and LDH	MAPK3	0.426802
PQT and LDH	PIK3CA	0.455198
PQT and LDH	FGF2	0.21464
PQT and LDH	STAT3	0.526681
PQT and LDH	NOS3	0.174588
PQT and LDH	TERT	0.330001
PQT and LDH	CASP3	0.361138
PQT and LDH	GSK3B	0.451386
PQT and LDH	NOS2	0.339833
PQT and LDH	CASP9	0.188266
PQT and LDH	MTOR	0.289275
PQT and LDH	CHUK	0.213213
PQT and LDH	XIAP	0.196593
PQT and LDH	JUN	0.353966
PQT and LDH	BCL2L1	0.255059
PQT and LDH	PIK3CD	0.297267
PQT and LDH	AKT2	0.254282
PQT and LDH	BAD	0.163483
PQT and LDH	ILK	0.169689
PQT and LDH	BCL2	0.293215
PQT and LDH	RAF1	0.220208
PQT and LDH	PIK3CG	0.262714
PQT and LDH	PIK3R1	0.388605
PQT and LDH	IKBKB	0.262582
PQT and LDH	HIF1A	0.270723
PQT and LDH	VAV1	0.181071
PQT and LDH	AKT3	0.243859
PQT and LDH	PIK3CB	0.30869
PQT and LDH	CDC42	0.215886
PQT and LDH	ALDH1A1	0.0742408
PQT and LDH	CYP2C9	0.194202
PQT and LDH	COMT	0.0938508
PQT and LDH	CYP2C19	0.265888
PQT and LDH	PTGS2	0.509667
PQT and LDH	PTGS1	0.2058
PQT and LDH	PLA2G4A	0.141135
PQT and LDH	PARP1	0.363153
PQT and LDH	CASP6	0.15504
PQT and LDH	CTSB	0.172824
PQT and LDH	PITRM1	1.38697e-05
PQT and LDH	FPR2	0.0838633
PQT and LDH	SNCA	0.141039
PQT and LDH	PRNP	0.135274
PQT and LDH	CREBBP	0.281444
PQT and LDH	BRD4	0.228598
PQT and LDH	HDAC1	0.314183
PQT and LDH	NCOR2	0.150507
PQT and LDH	CHEK2	0.174272
PQT and LDH	CDK4	0.233203
PQT and LDH	CDK2	0.4389
PQT and LDH	CASP8	0.241341
PQT and LDH	ERCC5	0.00449825
PQT and LDH	ATR	0.146213
PQT and LDH	AURKA	0.238073
PQT and LDH	CCNA2	0.268245
PQT and LDH	CCNB1	0.335233
PQT and LDH	MAP2K1	0.210127
PQT and LDH	CTSL	0.153041
PQT and LDH	MCL1	0.257576
PQT and LDH	CASP7	0.187579
PQT and LDH	MAP2K2	0.150532
PQT and LDH	PRKCE	0.174455
PQT and LDH	PRKCB	0.219448
PQT and LDH	RELA	0.263687
PQT and LDH	LYN	0.217287
PQT and LDH	CALM1	0.172582
PQT and LDH	SELL	0.172585
PQT and LDH	TRPV1	0.166346
PQT and LDH	HDAC4	0.149596
PQT and LDH	CAPN1	0.202055
PQT and LDH	CAPN2	0.166069
PQT and LDH	CAPNS1	0.00287718
PQT and LDH	CASP1	0.189018
PQT and LDH	IL1B	0.280185
PQT and LDH	NLRP3	0.160504
PQT and LDH	PTGES	0.0868058
PQT and LDH	CCNE1	0.20701
PQT and LDH	CDC25A	0.329763
PQT and LDH	CDK3	0.0241204
PQT and LDH	HDAC3	0.147818
PQT and LDH	ERBB2	0.303081
PQT and LDH	CCND3	0.13406
PQT and LDH	FOS	0.238098
PQT and LDH	CXCR3	0.142655
PQT and LDH	CXCL8	0.236627
PQT and LDH	CCR3	0.121174
PQT and LDH	SIRT1	0.222238
PQT and LDH	SCARB1	0.133082
PQT and LDH	EGFR	0.666094
PQT and LDH	PPARG	0.327203
PQT and LDH	CES1	0.153209
PQT and LDH	MPO	0.176371
PQT and LDH	NAT1	0.0928079
PQT and LDH	CES2	0.123773
PQT and LDH	PON1	0.00470405
PQT and LDH	F2R	0.109095
PQT and LDH	CHRNA3	0.134419
PQT and LDH	CHRNA5	0.125024
PQT and LDH	NFKBIA	0.214995
PQT and LDH	MMP2	0.331136
PQT and LDH	MMP9	0.393805
PQT and LDH	SLC6A4	0.129026
PQT and LDH	PLAT	0.0293819
PQT and LDH	PPARA	0.202752
PQT and LDH	NR3C1	0.425039
PQT and LDH	FGFR1	0.182984
PQT and LDH	LCK	0.26256
PQT and LDH	CSNK2A1	0.250271
PQT and LDH	CTSG	0.108364
PQT and LDH	CX3CR1	0.0801711
PQT and LDH	ICAM1	0.252229
PQT and LDH	IL6	0.364731
PQT and LDH	MIF	5.78663e-05
PQT and LDH	VCAM1	0.198644
PQT and LDH	GSTM1	0.118007
PQT and LDH	GSTA1	0.0852706
PQT and LDH	IDO1	0.167049
PQT and LDH	GSTP1	0.170736
PQT and LDH	XDH	0.143443
PQT and LDH	TYMP	0.0115382
PQT and LDH	P2RY12	0.0633476
PQT and LDH	EPHX2	0.0477638
PQT and LDH	NR1I2	0.0137087
PQT and LDH	EHMT2	0.142538
PQT and LDH	DUSP1	0.0135644
PQT and LDH	EDNRB	0.101231
PQT and LDH	MET	0.322658
PQT and LDH	EZR	0.170869
PQT and LDH	F9	0.00450371
PQT and LDH	SELP	0.175053
PQT and LDH	PPARD	0.129845
PQT and LDH	TEK	0.00232211
PQT and LDH	FGR	0.0457799
PQT and LDH	PTK2B	0.133695
PQT and LDH	FPR1	6.07382e-06
PQT and LDH	G6PD	0.273142
PQT and LDH	GSR	0.137349
PQT and LDH	IL6ST	0.17862
PQT and LDH	OPRM1	0.126485
PQT and LDH	HSF1	0.122973
PQT and LDH	HCK	0.148003
PQT and LDH	KDM5B	0.00157615
PQT and LDH	SLC2A1	0.138499
PQT and LDH	HLA-DRB1	0.0786404
PQT and LDH	HMOX1	0.103372
PQT and LDH	NQO1	0.166306
PQT and LDH	KCNH2	0.0441134
PQT and LDH	HSPA1A	0.00148723
PQT and LDH	ITGA2B	0.182381
PQT and LDH	ITGB2	0.187307
PQT and LDH	ITGB3	0.19965
PQT and LDH	TYK2	0.184092
PQT and LDH	ITGA5	0.138353
PQT and LDH	ITGA2	0.16183
PQT and LDH	KCNE1	0.0129896
PQT and LDH	KCNQ1	0.101492
PQT and LDH	KCNK2	0.124978
PQT and LDH	KDM3A	0.00990927
PQT and LDH	OPRD1	0.101335
PQT and LDH	THRB	0.167153
PQT and LDH	TYR	0.156818
PQT and LDH	MMP1	0.0521066
PQT and LDH	MMP3	0.13459
PQT and LDH	MMP14	0.129945
PQT and LDH	MMP7	0.123333
PQT and LDH	NOX4	0.00428653
PQT and LDH	P2RY1	3.28754e-06
PQT and LDH	RAC1	0.118517
PQT and LDH	PI4KB	0.00147328
PQT and LDH	PLA2G2A	0.00180879
PQT and LDH	PLAU	0.0327918
PQT and LDH	PLAUR	0.0327121
PQT and LDH	PLD2	0.0871677
PQT and LDH	PTGER2	0.0780576
PQT and LDH	UBA2	0.101411
PQT and LDH	SCN9A	0.12498

## Sheet: Table 9
Supplementary Table 9: Thermal Hyperalgesia Test Results
Date	Number of Rats	Control Group	Model Group	TSD Group	YJD Group	PQT Group
Day 6 of Adaptive Feeding	1	18.85	21.87	19.96	18.45	20.27
Day 6 of Adaptive Feeding	2	16.69	15.98	18.12	18.96	18.72
Day 6 of Adaptive Feeding	3	18.45	16.56	18.1	20.45	15.61
Day 6 of Adaptive Feeding	4	17.28	21.12	19.11	18.02	18.39
Day 6 of Adaptive Feeding	5	18.58	17.27	17.38	15.96	13
Day 6 of Adaptive Feeding	6	20.83	14.69	21.89	16.81	18.56
Day 1 Post Modeling	1	18.34	6.32	8.3	3.9	8.62
Day 1 Post Modeling	2	18.02	7.47	6.91	6.53	8.08
Day 1 Post Modeling	3	15.38	7.01	7.49	9.75	6.01
Day 1 Post Modeling	4	15.07	7.87	5.89	6.77	7.58
Day 1 Post Modeling	5	16.16	7.89	5.93	4.29	4.91
Day 1 Post Modeling	6	17.85	4.45	5.87	5.99	5.47
Day 1 of Drug Intervention	1	18.05	5.05	4.33	9.93	6.52
Day 1 of Drug Intervention	2	23.81	8.4	7.72	7.54	3.86
Day 1 of Drug Intervention	3	15.01	9.54	10.64	6.42	10.88
Day 1 of Drug Intervention	4	19.51	5.62	4.66	7.59	9.11
Day 1 of Drug Intervention	5	19.22	8.37	9.59	9.18	10.72
Day 1 of Drug Intervention	6	18.04	5.5	10.61	4.9	6.54
Day 7 of Drug Intervention	1	15.01	9.45	10.45	9.52	11.24
Day 7 of Drug Intervention	2	16.91	9.16	9.9	9.69	9.74
Day 7 of Drug Intervention	3	19.43	8.89	6.94	11.81	8.9
Day 7 of Drug Intervention	4	18.78	5.53	6.84	10.9	10.07
Day 7 of Drug Intervention	5	20.81	8.24	6.55	11.18	12.15
Day 7 of Drug Intervention	6	16.64	7.22	13.94	9.36	8.78
Day 14 of Drug Intervention	1	17.98	12.33	6.97	9.12	11.55
Day 14 of Drug Intervention	2	18.77	9	9.3	8.71	12.71
Day 14 of Drug Intervention	3	14.87	6.01	8.77	13.19	13.72
Day 14 of Drug Intervention	4	19.75	7.86	10.01	11	14.41
Day 14 of Drug Intervention	5	17.27	7.84	12.44	12.25	8.9
Day 14 of Drug Intervention	6	19.71	9.95	5.85	15.02	9.22
Day 21 of Drug Intervention	1	20.25	9.91	7.23	10.47	15.31
Day 21 of Drug Intervention	2	18.81	6.7	8.82	13.37	15.51
Day 21 of Drug Intervention	3	16.63	12.06	10.83	15.45	9.97
Day 21 of Drug Intervention	4	16.66	9.85	8.33	15.14	10.95
Day 21 of Drug Intervention	5	19.16	7.91	10.19	15.71	11.23
Day 21 of Drug Intervention	6	15.29	7.29	11.88	15.03	10.86
Day 28 of Drug Intervention	1	18.28	7.14	12.94	15.72	12.47
Day 28 of Drug Intervention	2	17.48	8.12	8.51	15.21	13.55
Day 28 of Drug Intervention	3	16.39	11.05	8.07	16.87	13.94
Day 28 of Drug Intervention	4	15.21	10.4	12.06	16.49	14.6
Day 28 of Drug Intervention	5	16.65	5.98	10.43	14.33	15.93
Day 28 of Drug Intervention	6	17.4	7.52	10.84	14.68	13.64
